# Supplementary material for: Assessing the potential return on investment of the proposed UK NHS diabetes prevention programme in different population subgroups: an economic evaluation
Source: PubMed Central journal article supplement — BMJ Open. 2017 Aug 21;7(8):e014953. doi: 10.1136/bmjopen-2016-014953 (PMC5724090; doi:10.1136/bmjopen-2016-014953), 2017-08-21
Supplement: bmjopen-2016-014953supp001.pdf [file bmjopen-2016-014953supp001.pdf]

## ONLINE ONLY SUPPLEMENTAL MATERIAL

Full Title: Assessing the Potential Return on Investment of the Proposed NHS Diabetes Prevention Programme in Different Population Subgroups: An Economic Evaluation

Running Title: Return on Investment of the NHS DPP

Chloe Thomas, Susi Sadler, Penny Breeze, Hazel Squires, Michael Gillett, Alan Brennan

A) SUPPLEMENTARY TABLES & FIGURES

B) SUPPLEMENTARY METHODS

## CONTENTS

|                                                               |    |
|---------------------------------------------------------------|----|
| A) SUPPLEMENTARY TABLES & FIGURES .....                       | 2  |
| B) SUPPLEMENTARY METHODS .....                                | 9  |
| CONCEPTUAL MODELLING .....                                    | 9  |
| MODEL STRUCTURE.....                                          | 9  |
| DATA SELECTION.....                                           | 10 |
| BASELINE POPULATION .....                                     | 10 |
| MISSING DATA IMPUTATION .....                                 | 14 |
| POPULATION SELECTION.....                                     | 20 |
| GP ATTENDENCE IN THE GENERAL POPULATION .....                 | 20 |
| LONGITUDINAL TRAJECTORIES OF METABOLIC RISK FACTORS .....     | 21 |
| METABOLIC RISK FACTOR SCREENING, DIAGNOSIS AND TREATMENT..... | 23 |
| COMORBID OUTCOMES AND MORTALITY .....                         | 25 |
| UTILITIES.....                                                | 41 |
| COSTS .....                                                   | 43 |
| INTERVENTION.....                                             | 48 |
| MODEL PARAMETERS.....                                         | 52 |
| QUALITY ASSURANCE.....                                        | 63 |
| REFERENCE LIST .....                                          | 64 |

## A) SUPPLEMENTARY TABLES & FIGURES

| CHARACTERISTIC                                                                                                                                                                                                                                                          | NUMBER | PERCENTAGE         |        |
|-------------------------------------------------------------------------------------------------------------------------------------------------------------------------------------------------------------------------------------------------------------------------|--------|--------------------|--------|
| Male                                                                                                                                                                                                                                                                    | 644    | 43.2%              |        |
| Female                                                                                                                                                                                                                                                                  | 848    | 56.8%              |        |
| White                                                                                                                                                                                                                                                                   | 1332   | 89.3%              |        |
| BME                                                                                                                                                                                                                                                                     | 160    | 10.7%              |        |
| <i>Indian</i>                                                                                                                                                                                                                                                           | 46     | 3.1%               |        |
| <i>Pakistani</i>                                                                                                                                                                                                                                                        | 23     | 1.5%               |        |
| <i>Bangladeshi</i>                                                                                                                                                                                                                                                      | 5      | 0.3%               |        |
| <i>Other Asian</i>                                                                                                                                                                                                                                                      | 19     | 1.3%               |        |
| <i>Caribbean</i>                                                                                                                                                                                                                                                        | 16     | 1.1%               |        |
| <i>African</i>                                                                                                                                                                                                                                                          | 28     | 1.9%               |        |
| <i>Chinese</i>                                                                                                                                                                                                                                                          | 4      | 0.3%               |        |
| <i>Other</i>                                                                                                                                                                                                                                                            | 19     | 1.3%               |        |
| Age1 < 40                                                                                                                                                                                                                                                               | 279    | 18.7%              |        |
| Age2 40-59                                                                                                                                                                                                                                                              | 482    | 32.3%              |        |
| Age3 60-74                                                                                                                                                                                                                                                              | 453    | 30.4%              |        |
| Age4 75+                                                                                                                                                                                                                                                                | 278    | 18.6%              |        |
| IMD 1 (least deprived)                                                                                                                                                                                                                                                  | 339    | 22.7%              |        |
| IMD 2                                                                                                                                                                                                                                                                   | 436    | 29.2%              |        |
| IMD 3                                                                                                                                                                                                                                                                   | 177    | 11.9%              |        |
| IMD 4                                                                                                                                                                                                                                                                   | 297    | 19.9%              |        |
| IMD 5 (most deprived)                                                                                                                                                                                                                                                   | 243    | 16.3%              |        |
| Working                                                                                                                                                                                                                                                                 | 679    | 45.5%              |        |
| Retired                                                                                                                                                                                                                                                                 | 584    | 39.1%              |        |
| Other                                                                                                                                                                                                                                                                   | 229    | 15.3%              |        |
| BMI1 < 25 kg/m <sup>2</sup>                                                                                                                                                                                                                                             | 409    | 27.4%              |        |
| BMI2 25-29 kg/m <sup>2</sup>                                                                                                                                                                                                                                            | 586    | 39.3%              |        |
| BMI3 30-34 kg/m <sup>2</sup>                                                                                                                                                                                                                                            | 324    | 21.7%              |        |
| BMI4 ≥ 35 kg/m <sup>2</sup>                                                                                                                                                                                                                                             | 173    | 11.6%              |        |
| HbA1c 6-6.1 % (42-44 mmol/mol )                                                                                                                                                                                                                                         | 763    | 51.1%              |        |
| HbA1c 6.2-6.4 % (45-47 mmol/mol)                                                                                                                                                                                                                                        | 729    | 48.9%              |        |
|                                                                                                                                                                                                                                                                         | MEAN   | STANDARD DEVIATION | MEDIAN |
| Age (years)                                                                                                                                                                                                                                                             | 57.1   | 17.8               | 58.0   |
| BMI (kg/m <sup>2</sup> )                                                                                                                                                                                                                                                | 28.4   | 5.7                | 27.8   |
| Total Cholesterol (mmol/l)                                                                                                                                                                                                                                              | 5.7    | 1.0                | 5.7    |
| HDL Cholesterol (mmol/l)                                                                                                                                                                                                                                                | 1.5    | 0.4                | 1.5    |
| HbA1c (%)                                                                                                                                                                                                                                                               | 6.19   | 0.14               | 6.19   |
| Systolic Blood Pressure (mm Hg)                                                                                                                                                                                                                                         | 129.7  | 17.2               | 128.5  |
| EQ-5D (TTO)                                                                                                                                                                                                                                                             | 0.739  | 0.307              | 0.796  |
| BME Black and Minority Ethnic; BMI Body Mass Index; IMD Index of Multiple Deprivation; CVD Cardiovascular Disease; IGR Impaired Glucose Regulation; HDL High Density Lipoprotein; EQ-5D 5 dimensions Euroqol (health related quality of life index); TTO Time Trade-Off |        |                    |        |

Table S1: Baseline characteristics of the IGR individuals from HSE 2011, following imputation of missing metabolic data (N=1,492).

| SPECIFICATION                                                                                                                                                       | BASE-CASE | SA 1        | SA 2         | SA 3           | SA 4        |
|---------------------------------------------------------------------------------------------------------------------------------------------------------------------|-----------|-------------|--------------|----------------|-------------|
| Intervention Uptake*                                                                                                                                                | 32%       | 32%         | 32%          | 32%            | 32%         |
| Intervention Effectiveness <sup>6,15</sup> :                                                                                                                        |           |             |              |                |             |
| <i>Mean weight change (kg)</i>                                                                                                                                      | -3.24     | -3.24       | <b>-2.43</b> | -3.24          | -3.24       |
| <i>Mean BMI change (kg/m<sup>2</sup>)</i>                                                                                                                           | -1.47     | -1.47       | <b>-1.10</b> | -1.47          | -1.47       |
| <i>Mean SBP change (mmHg)</i>                                                                                                                                       | -6.57     | -6.57       | <b>-0.15</b> | -6.57          | -6.57       |
| <i>Mean cholesterol change (mmol/l)</i>                                                                                                                             | -0.28     | -0.28       | <b>-4.93</b> | -0.28          | -0.28       |
| <i>Mean HbA1c change (%)</i>                                                                                                                                        | -0.20     | -0.20       | <b>-0.21</b> | -0.20          | -0.20       |
| Stratification of Intervention Effectiveness (kg) <sup>6 **</sup>                                                                                                   | -0.23     | <b>None</b> | -0.23        | -0.23          | -0.23       |
| Intervention Cost*                                                                                                                                                  | £270      | £270        | £270         | £270           | <b>£350</b> |
| Time to Weight Regain*                                                                                                                                              | 5 years   | 5 years     | 5 years      | <b>3 years</b> | 5 years     |
| * PHE estimates of expected values                                                                                                                                  |           |             |              |                |             |
| ** extra weight loss per unit increase in baseline BMI above 31.5 kg/m <sup>2</sup> , or weight gain per unit decrease in baseline BMI below 31.5 kg/m <sup>2</sup> |           |             |              |                |             |

Table S2: Key intervention specification parameters in the basecase and one-way sensitivity analysis (SA) scenarios. Values in bold indicate differences from basecase.

|                                                                                        | TOTAL COST | QALYS | NET MONETARY BENEFIT* | PROBABILITY COST-EFFECTIVE** | PROBABILITY COST-SAVING |
|----------------------------------------------------------------------------------------|------------|-------|-----------------------|------------------------------|-------------------------|
| Total Population                                                                       | -£131      | 0.038 | -£3,376               | 97%                          | 70%                     |
| <i>IMD Q1: low deprivation</i>                                                         | -£110      | 0.041 | -£2,638               | 83%                          | 57%                     |
| <i>IMD Q2</i>                                                                          | -£121      | 0.039 | -£3,034               | 87%                          | 60%                     |
| <i>IMD Q3</i>                                                                          | -£141      | 0.039 | -£3,608               | 71%                          | 53%                     |
| <i>IMD Q4</i>                                                                          | -£138      | 0.039 | -£3,543               | 83%                          | 58%                     |
| <i>IMD Q5: high deprivation</i>                                                        | -£159      | 0.033 | -£4,760               | 78%                          | 60%                     |
| <i>Age &lt;40</i>                                                                      | -£35       | 0.019 | -£1,811               | 64%                          | 46%                     |
| <i>Age 40-59</i>                                                                       | -£215      | 0.036 | -£5,909               | 89%                          | 72%                     |
| <i>Age 60-74</i>                                                                       | -£194      | 0.054 | -£3,591               | 91%                          | 66%                     |
| <i>Age 75+</i>                                                                         | £24        | 0.043 | £563                  | 81%                          | 40%                     |
| <i>Male</i>                                                                            | -£105      | 0.041 | -£2,529               | 91%                          | 59%                     |
| <i>Female</i>                                                                          | -£156      | 0.036 | -£4,303               | 94%                          | 68%                     |
| <i>BMI &lt;25</i>                                                                      | £123       | 0.016 | £7,396                | 51%                          | 26%                     |
| <i>BMI 25-29</i>                                                                       | -£83       | 0.039 | -£2,130               | 89%                          | 55%                     |
| <i>BMI 30-34</i>                                                                       | -£277      | 0.051 | -£5,360               | 92%                          | 74%                     |
| <i>BMI 35+</i>                                                                         | -£627      | 0.067 | -£9,286               | 93%                          | 83%                     |
| <i>White</i>                                                                           | -£132      | 0.039 | -£3,311               | 97%                          | 70%                     |
| <i>BME</i>                                                                             | -£121      | 0.030 | -£4,045               | 61%                          | 51%                     |
| <i>HbA1c 6-6.1</i>                                                                     | -£39       | 0.029 | -£1,305               | 87%                          | 49%                     |
| <i>HbA1c 6.2-6.4</i>                                                                   | -£226      | 0.048 | -£4,706               | 96%                          | 76%                     |
| <i>Working</i>                                                                         | -£150      | 0.036 | -£4,090               | 91%                          | 68%                     |
| <i>Retired</i>                                                                         | -£102      | 0.048 | -£2,088               | 93%                          | 58%                     |
| <i>Other</i>                                                                           | -£101      | 0.025 | -£3,915               | 68%                          | 52%                     |
| *Value of a QALY assumed to be £60,000 for net monetary benefit analysis <sup>17</sup> |            |       |                       |                              |                         |
| **At a willingness to pay threshold of £20,000 per QALY                                |            |       |                       |                              |                         |

Table S3: Summary table showing incremental PSA results for each subgroup compared with no DPP intervention. All results are reported per person given the intervention at 20 years following intervention implementation. Costs are discounted at 3.5% and QALYs at 1.5%. Higher cost savings, QALY gains and net monetary benefit are shown in deeper shades of red, whereas lowest cost savings, QALY gains and net monetary benefit are shown in blue.

|                      | BASECASE* |         | SA1     |         | SA2     |         | SA3     |         | SA4     |         |
|----------------------|-----------|---------|---------|---------|---------|---------|---------|---------|---------|---------|
|                      | Year CS   | Year CE | Year CS | Year CE | Year CS | Year CE | Year CS | Year CE | Year CS | Year CE |
| Total Population     | 12        | 6       | 10      | 5       | 20      | 7       | NCS     | 8       | NCS     | 7       |
| <i>IMD Q1</i>        | 13        | 6       | 10      | 5       | NCS     | 7       | NCS     | 8       | NCS     | 7       |
| <i>IMD Q2</i>        | 12        | 5       | 10      | 5       | NCS     | 6       | NCS     | 7       | NCS     | 6       |
| <i>IMD Q3</i>        | 13        | 6       | 10      | 5       | NCS     | 7       | NCS     | 8       | NCS     | 7       |
| <i>IMD Q4</i>        | 11        | 6       | 10      | 5       | 16      | 6       | NCS     | 8       | 17      | 7       |
| <i>IMD Q5</i>        | 11        | 6       | 9       | 5       | 16      | 7       | NCS     | 9       | 17      | 7       |
| <i>Age &lt;40</i>    | 19        | 9       | 11      | 8       | NCS     | 11      | NCS     | 17      | NCS     | 11      |
| <i>Age 40-59</i>     | 11        | 6       | 9       | 6       | 14      | 7       | NCS     | 9       | 14      | 7       |
| <i>Age 60-74</i>     | 9         | 5       | 8       | 4       | 12      | 6       | NCS     | 6       | 13      | 6       |
| <i>Age 75+</i>       | NCS       | 4       | NCS     | 4       | NCS     | 5       | NCS     | 5       | NCS     | 5       |
| <i>Male</i>          | 13        | 6       | 10      | 5       | NCS     | 6       | NCS     | 8       | NCS     | 7       |
| <i>Female</i>        | 11        | 6       | 10      | 5       | 16      | 7       | NCS     | 8       | 18      | 7       |
| <i>BMI &lt;25</i>    | NCS       | 10      | 11      | 6       | NCS     | 13      | NCS     | NCE     | NCS     | 13      |
| <i>BMI 25-29</i>     | 16        | 6       | 10      | 5       | NCS     | 7       | NCS     | 8       | NCS     | 7       |
| <i>BMI 30-34</i>     | 9         | 5       | 9       | 5       | 11      | 6       | NCS     | 6       | 11      | 6       |
| <i>BMI 35+</i>       | 5         | 3       | 7       | 4       | 6       | 4       | 8       | 4       | 7       | 4       |
| <i>White</i>         | 11        | 6       | 10      | 5       | 19      | 6       | NCS     | 7       | NCS     | 6       |
| <i>BME</i>           | 14        | 7       | 10      | 6       | NCS     | 9       | NCS     | 11      | NCS     | 9       |
| <i>HbA1c 6-6.1</i>   | NCS       | 7       | 14      | 6       | NCS     | 8       | NCS     | 10      | NCS     | 9       |
| <i>HbA1c 6.2-6.4</i> | 9         | 5       | 8       | 4       | 12      | 6       | NCS     | 6       | 12      | 6       |
| <i>Working</i>       | 12        | 7       | 10      | 6       | 17      | 8       | NCS     | 9       | 19      | 8       |
| <i>Retired</i>       | 11        | 5       | 9       | 4       | NCS     | 5       | NCS     | 6       | NCS     | 5       |
| <i>Other</i>         | 14        | 7       | 10      | 6       | NCS     | 8       | NCS     | 11      | NCS     | 9       |

CS Cost-Saving; CE Cost-Effective; NCS Not Cost-Saving within 20 years; NCE Not Cost-Effective within 20 years  
\*Stratified intervention effect by BMI, 5 year duration of intervention effect, intervention cost £270.

Table S4: Comparison of the year that the intervention becomes cost-saving and cost-effective (using a threshold of £20,000 per QALY) between different population subgroups for each deterministic sensitivity analysis. Depth of shading represents how early cost-savings/cost-effectiveness occur, with darker grey representing earlier years.

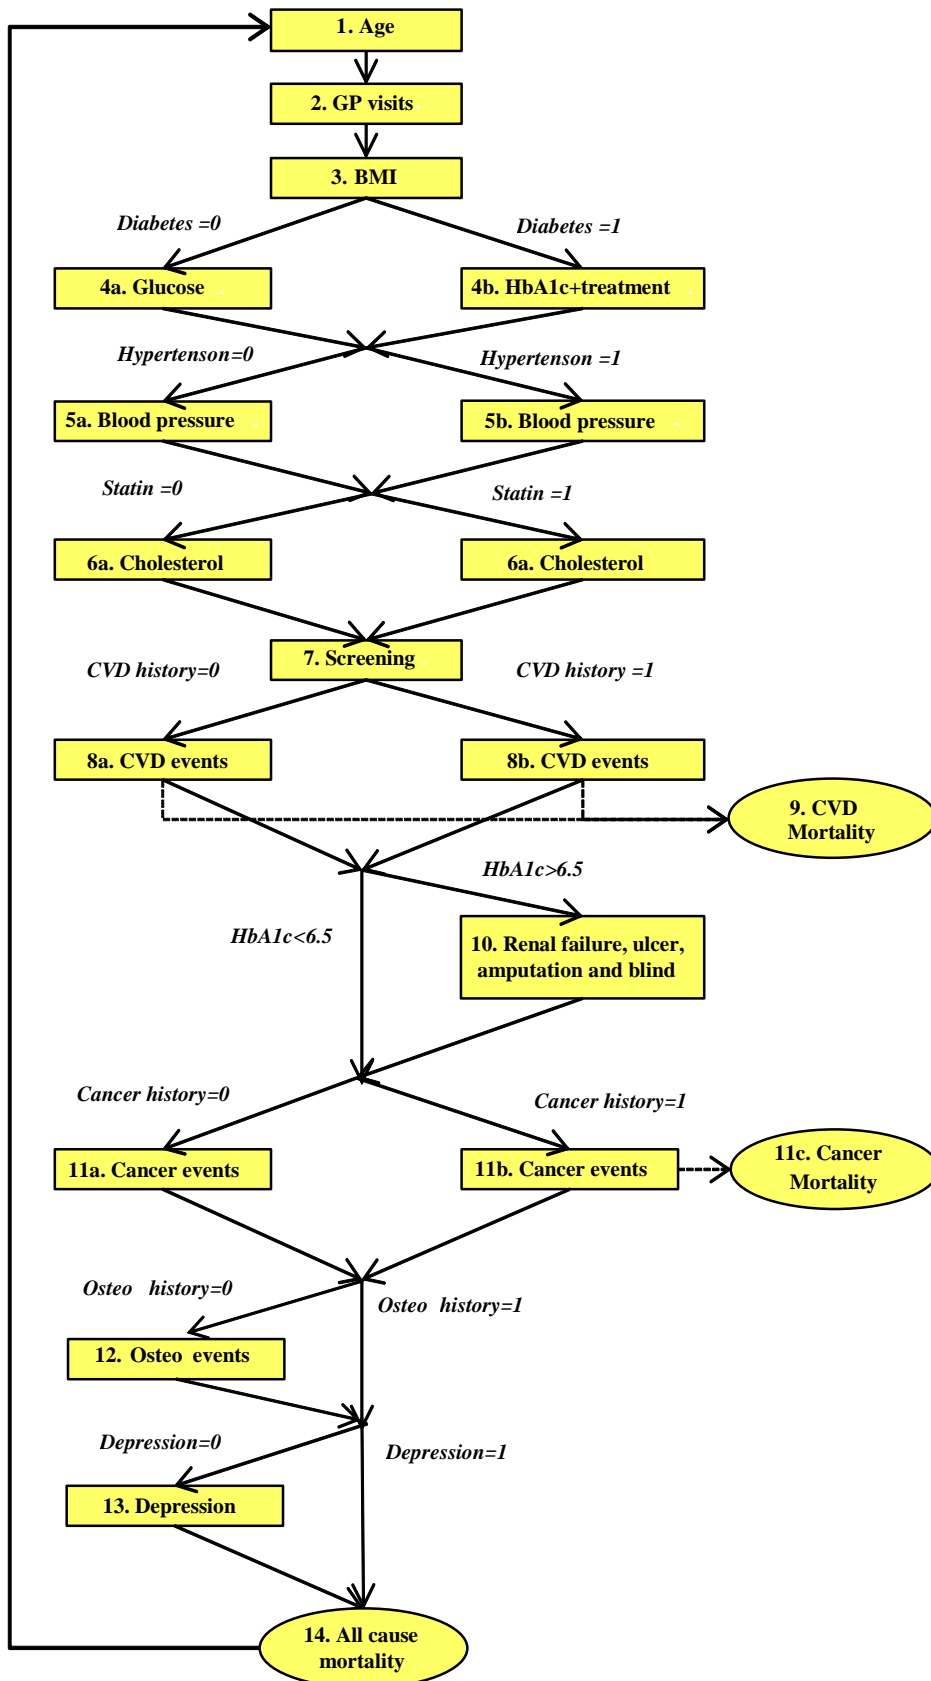

Figure S1: Model schematic showing what happens in each yearly cycle.

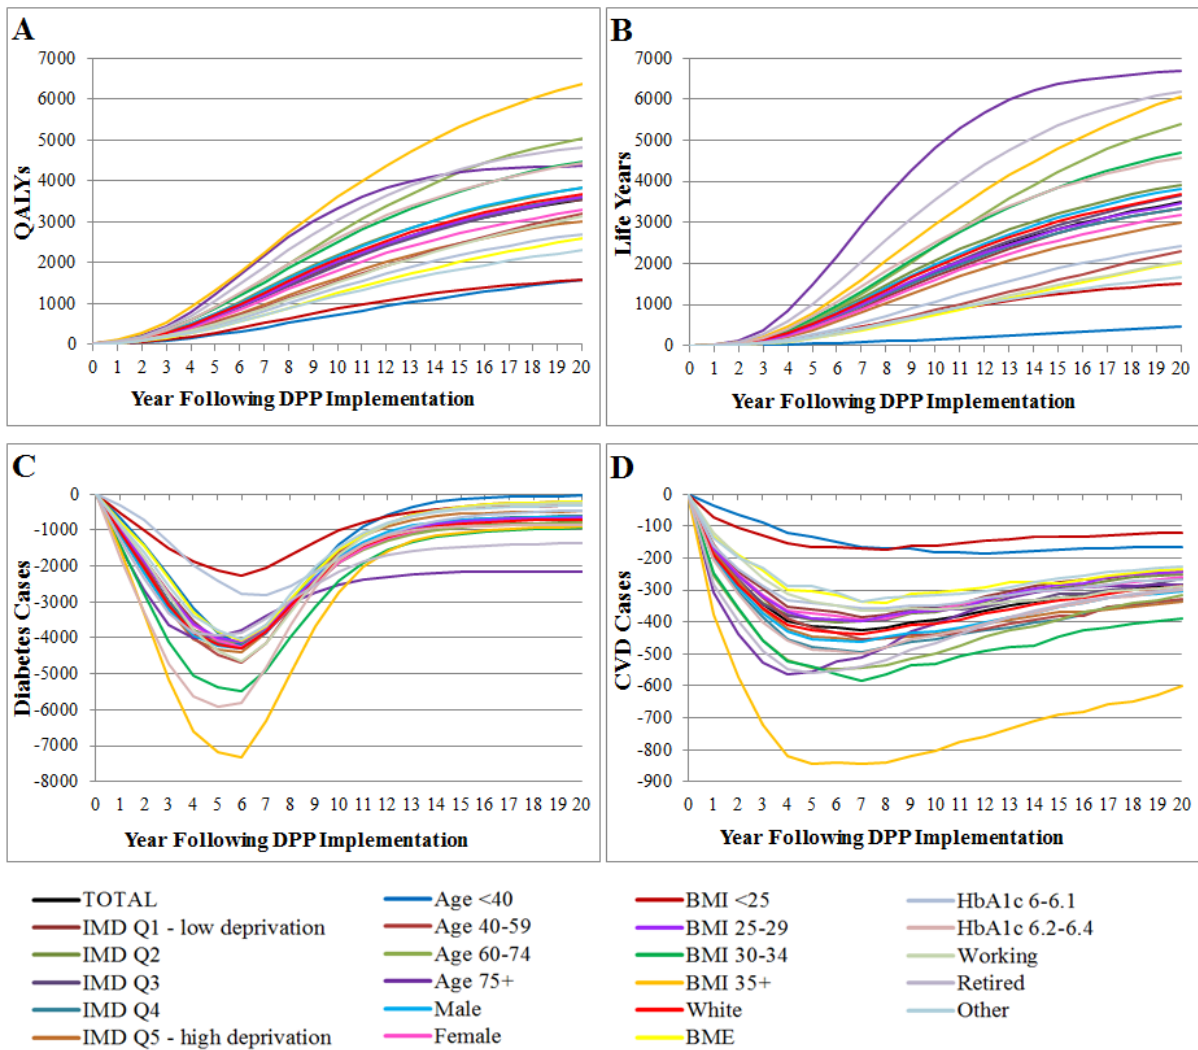

Figure S2: Graphs showing cumulative gain of A) QALYs and B) life years; and reduction in C) incremental diabetes cases and D) incremental CVD cases, per 100,000 individuals across all subgroups over 20 years.

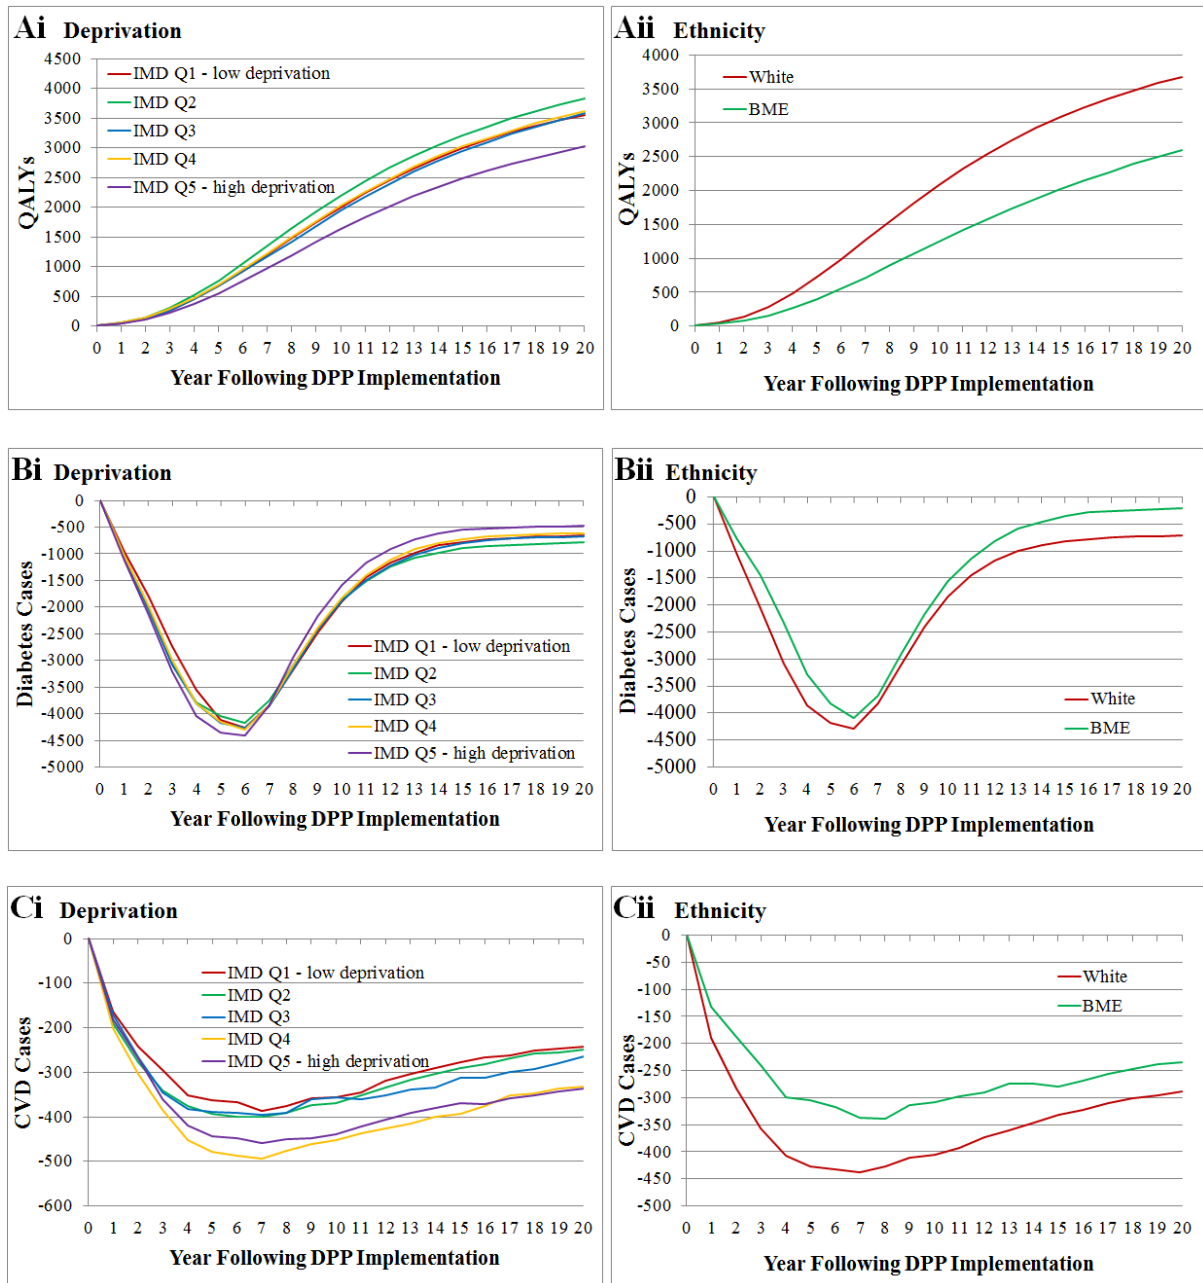

Figure S3: Graphs showing: A) cumulative incremental QALY gain; B) incremental reduction in diabetes cases and C) incremental reduction in CVD cases per 100,000 individuals in different deprivation quintiles (i) and ethnic groups (ii)



## B) SUPPLEMENTARY METHODS

### CONCEPTUAL MODELLING

A conceptual model of the problem and a model-based conceptual model were developed according to a new conceptual modelling framework for complex public health models (1). In line with this framework the conceptual models were developed in collaboration with a project stakeholder group comprising health economists, public health specialists, research collaborators from other SPHR groups, diabetologists, local commissioners and lay members. The conceptual model of the problem mapped out all relevant factors associated with diabetes based upon iterative literature searches. Key initial sources were reports of two existing diabetes prevention models used for National Institute for Health and Care Excellence public health guidance (2;3). This conceptual model of the problem was presented at a Stakeholder Workshop. Discussion at the workshop led to modifications of the model, identifying additional outcomes such as depression and helping to identify a suitable conceptual model boundary for the cost-effectiveness model structure.

### MODEL STRUCTURE

The model is based upon individual longitudinal trajectories of metabolic risk factors (BMI, systolic blood pressure [SBP], cholesterol and HbA1c [measure of blood glucose]). For each individual, yearly changes in these risk factors occur, dependent upon the individuals' baseline characteristics. Figure 1 in the main article illustrates the sequence of updating clinical characteristics and clinical events that are estimated within a cycle of the model. This sequence is repeated for every annual cycle of the model. The first stage of the sequence updates the age of the individual. The second stage estimates how many times the individual attends the GP. The third stage estimates the change in BMI of the individual from the previous period. In the fourth stage, if the individual has not been diagnosed as diabetic (Diabetes\_Dx=0) their change in glycaemia is estimated using the Whitehall II model. If they are diabetic (Diabetes\_Dx=1), it is estimated using the UKPDS model. In stages five and six the individual's blood pressure and cholesterol are updated using the Whitehall II model if the individual is not identified as hypertensive or receiving statins. In stage seven, the individual may undergo assessment for diabetes, hypertension and dyslipidaemia during a GP consultation. From stage eight onwards the individual may experience cardiovascular outcomes, diabetes related complications, cancer, osteoarthritis or depression. If the individual has a history of cardiovascular disease (CVD history=1), they follow a different pathway in stage eight to those without a history of cardiovascular disease (CVD history=0). Individuals with HbA1c greater than 6.5 are assumed to be at risk of diabetes related complications. Individuals who do not have a history of cancer (Cancer history=0) are

at risk of cancer diagnosis, whereas those with a diagnosis of cancer (Cancer history=1) are at risk of mortality due to cancer. Individuals without a history of osteoarthritis or depression may develop these conditions in stages 12 and 13. Finally, all individuals are at risk of dying due to causes other than cardiovascular or cancer mortality. Death from renal disease is included in the estimate of other-cause mortality.

## **DATA SELECTION**

Having developed and agreed the model structure and boundary with the stakeholder group the project team sought suitable sources of data for the baseline population, GP attendance, metabolic risk trajectories, treatment algorithms, and risk models for long term health outcomes, health care and health related. Given the complexity of the model it was not possible to use systematic review methods to identify all sources of data for these model inputs. As a consequence we used a series of methods to identify the most appropriate sources of data within the time constraints of the project.

Firstly, we discussed data sources with the stakeholder groups and identified key studies in the UK that have been used to investigate diabetes and its complications and comorbidities. The stakeholder group included experts in the epidemiology of non-communicable disease who provided useful insight into the strengths and limitations of prominent cohort studies and trials that have studied the risks of long term health outcomes included in the model. The stakeholder group also included diabetes prevention cost-effectiveness modellers, whose understanding of studies that could be used to inform risk parameters, costs and health related quality of life estimates. Secondly, we used a review of economic evaluations of diabetes prevention and weight management cost-effectiveness studies to identify sources of data used in similar economic evaluations (4). Thirdly, we conducted targeted literature searches where data could not be identified from large scale studies of a UK population, or could be arguably described as representative of a UK population through processes described above.

## **BASELINE POPULATION**

The model required demographic, anthropometric and metabolic characteristics that would be representative of the UK general population. The Health Survey for England (HSE) was suggested by the stakeholder group because it collects up-to-date cross-sectional data on the characteristics of all ages of the English population. It also benefits from being a reasonably good representation of the socioeconomic profile of England. A major advantage of this dataset is that it includes important clinical risk factors such as HbA1c, SBP, and cholesterol. The characteristics of individuals included

in the cost-effectiveness model were based sampled from the HSE 2011 dataset (5). The HSE 2011 focused on CVD and associated risk factors. The whole dataset was obtained from the UK Data Service. The total sample size of the HSE 2011 is 10,617 but individuals aged under 16 were excluded resulting in 8,610 in total.

Only a subset of variables reported in the HSE 2011 cohort was needed to inform the baseline characteristics in the economic model. A list of model baseline characteristics and the corresponding variable name and description from the HSE 2011 are listed below in Table 1. Two questions for smoking were combined to describe smoking status according to the QRISK2 algorithm in which former smokers and the intensity of smoking are recorded within one measure. The number of missing data for each observation in the HSE data is detailed in Table 1 and summary statistics for the data extracted from the HSE2011 dataset are reported in Table 2.

**Table 1: HSE variable names and missing data summary**

| <b>Model requirements</b>         | <b>HSE 2011 variable name</b> | <b>HSE 2011 variable description</b>                         | <b>No. Missing data entries</b> |
|-----------------------------------|-------------------------------|--------------------------------------------------------------|---------------------------------|
| Age                               | Age                           | Age last birthday                                            | 0                               |
| Sex                               | Sex                           | Sex                                                          | 0                               |
| Ethnicity                         | Origin                        | Ethnic origin of individual                                  | 36                              |
| Deprivation (Townsend)            | qimd                          | Quintile of IMD SCORE                                        | 0                               |
| Weight                            | wtval                         | Valid weight (Kg) inc. estimated>130kg                       | 1284                            |
| Height                            | htval                         | Valid height (cm)                                            | 1207                            |
| BMI                               | bmival                        | Valid BMI                                                    | 1431                            |
| Waist circumference               | wstval                        | Valid Mean Waist (cm)                                        | 2871                            |
| Waist-Hip ratio                   | whval                         | Valid Mean Waist/Hip ratio                                   | 2882                            |
| Total Cholesterol                 | cholval                       | Valid Total Cholesterol Result                               | 4760                            |
| HDL cholesterol                   | hdlval                        | Valid HDL Cholesterol Result                                 | 4760                            |
| HbA1c                             | glyhbval                      | Valid Glycated HB Result                                     | 4360                            |
| FPG                               |                               |                                                              | N/A                             |
| 2-hr glucose                      |                               |                                                              | N/A                             |
| Systolic Blood pressure           | omsysval                      | Omron Valid Mean Systolic BP                                 | 3593                            |
| Hypertension treatment            | medcinbp                      | Currently taking any medicines, tablets or pills for high BP | 6050                            |
| Gestational diabetes              | pregdi                        | Whether pregnant when told had diabetes                      | 8008                            |
| Anxiety/depression                | Anxiety                       | Anxiety/Depression                                           | 930                             |
| Smoking                           | cigsta3                       | Cigarette Smoking Status: Current/Ex-Reg/Never-Reg           | 75                              |
|                                   | cigst2                        | Cigarette Smoking Status - Banded current smokers            | 74                              |
| Statins                           | lipid                         | Lipid lowering (Cholesterol/Fibrinogen) - prescribed         | 5804                            |
| Rheumatoid Arthritis              | compm12                       | XIII Musculoskeletal system                                  | 5                               |
| Atrial Fibrillation               | murmur1                       | Doctor diagnosed heart murmur (excluding pregnant)           | 2008                            |
| Family history diabetes           |                               |                                                              | N/A                             |
| History of Cardiovascular disease | cvdis2                        | Had CVD (Angina, Heart Attack or Stroke)                     | 3                               |
| Economic Activity                 | econact                       | Economic status                                              | 37                              |

**Table 2: Characteristics of final sample from HSE 2011 (N=8610)**

| Characteristic                                                                                                                                                                                                                            | Number      | Percentage                            |               |
|-------------------------------------------------------------------------------------------------------------------------------------------------------------------------------------------------------------------------------------------|-------------|---------------------------------------|---------------|
| Male                                                                                                                                                                                                                                      | 3822        | 44.4%                                 |               |
| White                                                                                                                                                                                                                                     | 7719        | 89.7%                                 |               |
| Indian                                                                                                                                                                                                                                    | 206         | 2.4%                                  |               |
| Pakistani                                                                                                                                                                                                                                 | 141         | 1.6%                                  |               |
| Bangladeshi                                                                                                                                                                                                                               | 46          | 0.5%                                  |               |
| Other Asian                                                                                                                                                                                                                               | 97          | 1.1%                                  |               |
| Caribbean                                                                                                                                                                                                                                 | 78          | 0.9%                                  |               |
| African                                                                                                                                                                                                                                   | 120         | 1.4%                                  |               |
| Chinese                                                                                                                                                                                                                                   | 35          | 0.4%                                  |               |
| Other                                                                                                                                                                                                                                     | 168         | 2.0%                                  |               |
| IMD 1 (least deprived)                                                                                                                                                                                                                    | 1774        | 20.6%                                 |               |
| IMD 2                                                                                                                                                                                                                                     | 1823        | 21.2%                                 |               |
| IMD 3                                                                                                                                                                                                                                     | 1830        | 21.3%                                 |               |
| IMD 4                                                                                                                                                                                                                                     | 1597        | 18.5%                                 |               |
| IMD 5 (most deprived)                                                                                                                                                                                                                     | 1586        | 18.4%                                 |               |
| Non-smoker                                                                                                                                                                                                                                | 4550        | 52.8%                                 |               |
| Past smoker                                                                                                                                                                                                                               | 2353        | 27.3%                                 |               |
| Current smoker                                                                                                                                                                                                                            | 1707        | 19.8%                                 |               |
| Anti-hypertensive treatment                                                                                                                                                                                                               | 1544        | 17.9%                                 |               |
| Statins                                                                                                                                                                                                                                   | 929         | 10.8%                                 |               |
| Pre-existing CVD                                                                                                                                                                                                                          | 639         | 7.4%                                  |               |
| Diagnosed diabetes                                                                                                                                                                                                                        | 572         | 6.6%                                  |               |
| Missing HbA1c data                                                                                                                                                                                                                        | 4706        | 54.7%                                 |               |
| Undiagnosed diabetes (HbA1c $\geq$ 6.5) before imputation HbA1c                                                                                                                                                                           | 98          | 1.1%<br>(2.5% those with HbA1c data)  |               |
| Undiagnosed diabetes (HbA1c $\geq$ 6.5) after imputation HbA1c                                                                                                                                                                            | 761         | 8.8%                                  |               |
| IGR (HbA1c 6-6.4%) before imputation HbA1c                                                                                                                                                                                                | 529         | 6.1%<br>(13.6% those with HbA1c data) |               |
| IGR (HbA1c 6-6.4%) after imputation HbA1c                                                                                                                                                                                                 | 1492        | 17.3%                                 |               |
|                                                                                                                                                                                                                                           | <b>Mean</b> | <b>Standard deviation</b>             | <b>Median</b> |
| Age (years)                                                                                                                                                                                                                               | 49.6        | 18.7                                  | 49.0          |
| BMI (kg/m <sup>2</sup> )                                                                                                                                                                                                                  | 27.4        | 5.4                                   | 26.6          |
| Total Cholesterol (mmol/l)                                                                                                                                                                                                                | 5.4         | 1.1                                   | 5.4           |
| HDL Cholesterol (mmol/l)                                                                                                                                                                                                                  | 1.5         | 0.4                                   | 1.5           |
| HbA1c (%)                                                                                                                                                                                                                                 | 5.7         | 0.8                                   | 5.6           |
| Systolic Blood Pressure (mm Hg)                                                                                                                                                                                                           | 126.3       | 17.0                                  | 124.5         |
| EQ-5D (TTO)                                                                                                                                                                                                                               | 0.825       | 0.244                                 | 0.848         |
| BMI Body Mass Index; IMD Index of Multiple Deprivation; CVD Cardiovascular Disease; IGR Impaired Glucose Regulation; HDL High Density Lipoprotein; EQ-5D 5 dimensions EuroQol (health related quality of life index) ; TTO Time Trade-Off |             |                                       |               |

A complete dataset was required for all individuals at baseline. However, no measurements for Fasting Plasma Glucose (FPG) or 2 hour glucose were obtained for the HSE 2011 cohort. In addition,

the questionnaire did not collect information about individual family history of diabetes or family history of Cardiovascular Disease (CVD). These variables were imputed from other datasets.

Many individuals were lacking responses to some questions but had data for others. One way of dealing with this is to exclude all individuals with incomplete data from the sample. However, this would have reduced the sample size dramatically, which would have been detrimental to the analysis. It was decided that it would be better to make use of all the data available to represent a broad range of individuals within the UK population. With this in mind, we decided to use assumptions and imputation models to estimate missing data.

## MISSING DATA IMPUTATION

### Ethnicity

Only a small number of individuals had missing data for ethnicity. In the QRISK2 algorithm the indicator for white includes individuals for whom ethnicity is not recorded. In order to be consistent with the QRISK2 algorithm we assumed that individuals with missing ethnicity data were white.

### Anthropometric data

A large proportion of anthropometric data was missing in the cohort. Table 3 reports the number of individuals with two or more anthropometric records missing. This illustrates that only 758 individuals had no anthropometric data at all. Imputation models for anthropometric data were developed utilising observations from other measures to help improve their accuracy.

**Table 3: Multi-way assessment of missing data**

| Conditions                           | Number of individuals |
|--------------------------------------|-----------------------|
| No weight and no height              | 1060                  |
| No weight and no waist circumference | 907                   |
| No weight and no hip circumference   | 906                   |
| No height and no waist circumference | 818                   |
| No height and no hip circumference   | 817                   |
| No hip and no waist                  | 2865                  |
| No anthropometric data               | 758                   |

Two imputation models were generated for each of the following anthropometric measures: weight, height, waist circumference and hip circumference. The first imputation method included an alternative anthropometric measure to improve precision. The second included only age and/or sex, to be used if the alternative measure was also missing. Simple ordinary least squares (OLS) regression models were used to predict missing data. Summary data for each measure confirmed that the data were approximately normally distributed. Covariate selection was made by selecting the

anthropometric measure that maximised the Adjusted R-squared statistic, and age and sex were included if the coefficients were statistically significant ( $P < 0.1$ ).

The imputation models for weight are reported in Table 4. Individuals' sex and age were included in both models. A quadratic relationship between age and weight was identified. Waist circumference had a positive and significant relationship with weight. The  $R^2$  for model 1 suggested that 80% of the variation in weight is described by the model. The  $R^2$  for model 2 was much lower as only 18% of the variation in weight was described by age and sex. The residual standard error is reported for both models.

**Table 4: Imputation model for weight**

| Coefficient             | Model 1 | Model 2 |
|-------------------------|---------|---------|
| Intercept               | -17.76  | 50.249  |
| Sex                     | 2.614   | 13.036  |
| Age                     | 0.064   | 0.903   |
| Age*Age                 | -0.0027 | -0.0086 |
| Waist circumference     | 1.060   |         |
| R-squared               | 0.7981  | 0.1831  |
| Residual standard error | 7.483   | 15.31   |

The imputation models for height are reported in Table 5. Individuals' sex and age were included in both models. A quadratic relationship between age and height was identified. Waist circumference had a positive and significant relationship with height. The  $R^2$  for model 1 suggested that 53% of the variation in height is described by the model suggesting a fairly good fit. The  $R^2$  for model 2 was slightly lower in which 52% of the variation in height was described by age and sex. The residual standard error is reported for both models.

**Table 5: Imputation model for height**

| Coefficient             | Model 1 | Model 2 |
|-------------------------|---------|---------|
| Intercept               | 157.4   | 162.1   |
| Sex                     | 12.82   | 13.43   |
| Age                     | 0.081   | 0.1291  |
| Age*Age                 | -0.0021 | -0.0025 |
| Waist circumference     | 0.071   |         |
| R-squared               | 0.532   | 0.5244  |
| Residual standard error | 6.617   | 6.682   |

The imputation models for waist circumference are reported in Table 6. Individuals' sex and age were included in both models. A quadratic relationship between age and waist circumference fit to the data better than a linear relationship. Weight had a positive and significant relationship with waist circumference. The  $R^2$  for model 1 suggested that 81% of the variation in waist circumference is described by the model suggesting a very good fit. The  $R^2$  for model 2 was much lower in which only

22% of the variation in waist circumference was described by age and sex which is a moderately poor fit. The residual standard error is reported for both models.

**Table 6: Imputation model for waist**

| <b>Coefficient</b>      | <b>Model 1</b> | <b>Model 2</b> |
|-------------------------|----------------|----------------|
| Intercept               | 28.73          | 65.327         |
| Sex                     | 0.5754         | 9.569          |
| Age                     | 0.1404         | 0.7617         |
| Age*Age                 | 0.0007         | -0.0053        |
| Weight                  | 0.7098         |                |
| R-squared               | 0.8096         | 0.2196         |
| Residual standard error | 6.122          | 12.44          |

The imputation models for hip circumference are reported in Table 7. Individuals' sex and age were included in both models. A quadratic relationship between age and hip circumference fit to the data better than a linear relationship. Weight had a positive and significant relationship with hip circumference. The R<sup>2</sup> for model 1 suggested that 80% of the variation in hip circumference is described by the model suggesting a very good fit. The R<sup>2</sup> for model 2 was much lower in which only 2% of the variation in hip circumference was described by age and sex which is a very poor fit. The residual standard error is reported for both models.

**Table 7: Imputation model for hip**

| <b>Coefficient</b>      | <b>Model 1</b> | <b>Model 2</b> |
|-------------------------|----------------|----------------|
| Intercept               | 66.9145        | 96.891         |
| Sex                     | -8.3709        | -0.9783        |
| Age                     | -0.1714        | 0.3528         |
| Age*Age                 | 0.0021         | -0.0029        |
| Weight                  | 0.5866         |                |
| R-squared               | 0.7949         | 0.023          |
| Residual standard error | 4.539          | 10.1           |

### **Metabolic data**

A large proportion of metabolic data was missing in the cohort, ranging from 2997-4309 observations for each metabolic measurement. Table 8 reports the number of individuals with two or more metabolic records missing. This illustrates that 2987 individuals have no metabolic data. Imputation models for metabolic data were developed utilising observations from other measures to help improve their accuracy.



**Table 8: Multi-way assessment of missing data**

| Conditions                           | Number of individuals |
|--------------------------------------|-----------------------|
| No HbA1c and no cholesterol          | 4309                  |
| No HbA1c and no blood pressure       | 2997                  |
| No cholesterol and no blood pressure | 3050                  |
| No metabolic data                    | 2987                  |

Two imputation models were generated for each of the following metabolic measures: total cholesterol, high density lipoprotein (HDL) cholesterol, HbA1c and systolic blood pressure (SBP) and. The first imputation method included an alternative metabolic measure to improve precision. The second included only age and/or sex, to be used if the alternative measure was also missing. Simple ordinary least squares (OLS) regression models were used to predict missing data. Summary data for each measure confirmed that the data were approximately normally distributed. Covariate selection was made by selecting the metabolic measure that maximised the adjusted R-squared statistic, and age and sex were included if the coefficients were statistically significant ( $P < 0.1$ ).

These imputation models were developed to estimate metabolic data from information collected in the HSE. An alternative approach would have been to use estimates of these measures from the natural history statistical models. At the time of the analysis it was uncertain what form and design the natural history models would take, therefore the HSE imputation models were developed for use until a better alternative was found.

The imputation models for total cholesterol are reported in Table 9. Individuals' age was included in both models. A quadratic relationship between age and weight was identified. Diastolic blood pressure had a positive and significant relationship with total cholesterol. The  $R^2$  for model 1 suggested that 20% of the variation in total cholesterol is described by the model. The  $R^2$  for model 2 was lower in which only 18% of the variation in total cholesterol was described by age. The residual standard error is reported for both models.

**Table 9: Imputation model for total cholesterol**

| Coefficient              | Model 1 | Model 2 |
|--------------------------|---------|---------|
| Intercept                | 1.973   | 2.821   |
| Age                      | 0.0774  | 0.0904  |
| Age*Age                  | -0.0006 | -0.0007 |
| Diastolic blood pressure | 0.0159  |         |
| R-squared                | 0.2035  | 0.1792  |
| Residual standard error  | 0.9526  | 0.9741  |

The imputation models for HDL cholesterol are reported in Table 10. Individuals' sex and age were included in both models. A quadratic relationship between age and height was identified. Diastolic blood pressure had a negative and significant relationship with HDL cholesterol. The  $R^2$  for model 1

suggested that only 13% of the variation in HDL cholesterol is described by the model suggesting a relatively poor fit. The  $R^2$  for model 2 suggested that 12% of the variation in HDL cholesterol was described by age and sex. The residual standard error is reported for both models.

**Table 10: Imputation model for HDL Cholesterol**

| <b>Coefficient</b>       | <b>Model 1</b> | <b>Model 2</b> |
|--------------------------|----------------|----------------|
| Intercept                | 1.501          | 1.383          |
| Sex                      | -0.279         | -0.274         |
| Age                      | 0.0086         | 0.0075         |
| Age*Age                  | -0.0001        | -0.00004       |
| Diastolic blood pressure | -0.0018        |                |
| R-squared                | 0.1198         | 0.1157         |
| Residual standard error  | 0.4122         | 0.417          |

The imputation models for HbA1c are reported in Table 11. Individuals' age was included in both models. A quadratic relationship between age and HbA1c fit to the data better than a linear relationship. SBP had a positive and significant relationship with HbA1c. The  $R^2$  for model 1 suggested that only 19% of the variation in HbA1c is described by the model, suggesting a modest fit. The  $R^2$  for model 2 described 18% of the variation in HbA1c by age alone. The residual standard error is reported for both models.

**Table 11: Imputation model for HbA1c**

| <b>Coefficient</b>      | <b>Model 1</b> | <b>Model 2</b> |
|-------------------------|----------------|----------------|
| Intercept               | 4.732          | 4.962          |
| Age                     | 0.0141         | 1.422          |
| Age*Age                 | -0.00003       | -0.00003       |
| Systolic blood pressure | 0.002          |                |
| R-squared               | 0.1941         | 0.1835         |
| Residual standard error | 0.4243         | 0.4228         |

The imputation models for SBP are reported in Table 12. Individuals' sex and age were included in both models. A linear relationship between age and SBP fit to the data better than a quadratic relationship. Total cholesterol and HbA1c had a positive and significant relationship with SBP, whereas HDL cholesterol had a negative significant relationship with SBP. The  $R^2$  for model 1 suggested that 22% of the variation in SBP is described by the model suggesting a modest fit. The  $R^2$  for model 2 was similar in which only 20% of the variation in SBP was described by age and sex. The residual standard error is reported for both models.

**Table 12: Imputation model for Systolic Blood Pressure**

| <b>Coefficient</b>      | <b>Model 1</b> | <b>Model 2</b> |
|-------------------------|----------------|----------------|
| Intercept               | 84.983         | 104.132        |
| Sex                     | 6.982          | 6.396          |
| Age                     | 0.330          | 0.380          |
| Total cholesterol       | 2.093          |                |
| HDL cholesterol         | -0.746         |                |
| HbA1c                   | 1.986          |                |
| R-squared               | 0.2235         | 0.2047         |
| Residual standard error | 14.59          | 15.1           |

**Treatment for Hypertension and Statins**

A large proportion of individuals had missing data for questions relating to whether they received treatment for hypertension or high cholesterol. The majority of non-responses to these questions were coded to suggest that the question was not applicable to the individual. As a consequence it was assumed that individuals with missing treatment data were not taking these medications.

**Gestational Diabetes**

Only 30 respondents without current diabetes reported that they had been diagnosed with diabetes during a pregnancy in the past. Most individuals had missing data for this question due to it not being applicable. The missing data was assumed to indicate that individuals had not had gestational diabetes.

**Anxiety/Depression**

Most individuals who had missing data for anxiety and depression did so because the question was not applicable. A small sample N=69 refused to answer the question. We assumed that individuals with missing data for anxiety and depression did not have severe anxiety/depression.

**Smoking**

Individuals with missing data for smoking status were assumed to be non-smokers, without a history of smoking.

**Rheumatoid Arthritis and Atrial Fibrillation**

A very small sample of individuals had missing data for musculoskeletal illness (N=5) and atrial fibrillation (N=1). These individuals were assumed to not suffer from these illnesses.

**Family history of diabetes**

No questions in the HSE referred to the individual having a family history of diabetes, so this data had to be imputed. It was important that data was correlated with other risk factors for diabetes, such as HbA1c and ethnicity. We analysed a cross-section of the Whitehall II dataset to generate a logistic

regression to describe the probability that an individual has a history of diabetes conditional on their HbA1c and ethnic origin. The model is described in Table 13.

**Table 13: Imputation model for history of diabetes**

|                 | <b>Coefficient</b> |
|-----------------|--------------------|
| Intercept       | -3.29077 (0.4430)  |
| HbA1c           | 0.28960 (0.0840)   |
| HDL Cholesterol | 0.81940 (0.13878)  |

### **Economic Activity**

Individuals without information about their employment status were assumed to be retired if aged 65 or over and in employment if under 65.

## **POPULATION SELECTION**

The DPP is only eligible to individuals with impaired glucose regulation (IGR), defined as HbA1c 6-6.4% in the model. The process of identifying eligible individuals or referring them to the DPP was not explicitly modelled. Instead, all individuals from the HSE 2011 with actual or imputed HbA1c levels between 6-6.4% are assumed to have been previously identified by a variety of means, and only these IGR individuals are included in the simulation. This means that the costs of identifying IGR individuals or referring them to the DPP intervention are not included.

## **GP ATTENDANCE IN THE GENERAL POPULATION**

Frequency of GP visits (separate from NHS health checks) was simulated in the dataset for two reasons; firstly, to estimate the healthcare utilisation for the ID population without diabetes and cardiovascular disease and secondly, to predict the likelihood that individuals participate in opportunistic screening for diabetes and vascular risks. It was assumed that GP attendance in the ID population occurs at the same frequency as in the general population. However, for cost purposes, consultations were assumed to take 40% longer than the general population average (see Costs section).

GP attendance conditional on age, sex, BMI, ethnicity, and health outcomes was derived from analysis of wave 1 of the Yorkshire Health Study (11). The analysis used a negative binomial regression model to estimate self-reported rate of GP attendance per 3 months (Table 14). The estimated number of GP visits was multiplied by 4 to reflect the annual number of visits per year.

**Table 14: GP attendance reported in the Yorkshire Health Study (N= 18,437)**

|                       | Model 1 |                | Model 2 |                |
|-----------------------|---------|----------------|---------|----------------|
|                       | Mean    | Standard error | Mean    | Standard error |
| Age                   | 0.0057  | 0.0005         | 0.0076  | 0.0005         |
| Male                  | -0.1502 | 0.0155         | -0.1495 | 0.0159         |
| BMI                   | 0.0020  | 0.0015         | 0.0110  | 0.0015         |
| IMD score 2010        | 0.0043  | 0.0005         |         |                |
| Ethnicity (Non-white) | 0.1814  | 0.0370         | 0.2620  | 0.0375         |
| Heart Disease         | 0.1588  | 0.0281         | 0.2533  | 0.0289         |
| Depression            | 0.2390  | 0.0240         | 0.6127  | 0.0224         |
| Osteoarthritis        | 0.0313  | 0.0240         | 0.2641  | 0.0238         |
| Diabetes              | 0.2023  | 0.0270         | 0.2702  | 0.0278         |
| Stroke                | 0.0069  | 0.0460         | 0.1659  | 0.0474         |
| Cancer                | 0.1908  | 0.0400         | 0.2672  | 0.0414         |
| Intercept             | 0.6275  | 0.0590         | -0.5014 | 0.0468         |
| Alpha                 | 0.3328  | 0.0097         | 0.3423  | 0.0108         |

## LONGITUDINAL TRAJECTORIES OF METABOLIC RISK FACTORS

A detailed description of the statistical analysis behind the personalised metabolic risk factor trajectories that underlie disease risk in the SPHR Diabetes Prevention model has previously been published (12), so this report provides only a brief summary.

A statistical analysis of the Whitehall II cohort study (13) was developed to describe correlated longitudinal changes in metabolic risk factors including BMI, latent blood glucose (an underlying, unobservable propensity for diabetes), total cholesterol, HDL cholesterol and systolic blood pressure. Parallel latent growth modelling was used to estimate the unobservable latent glycaemia and from this identify associations with test results for HbA1c, FPG, and 2-hour glucose. The growth factors (longitudinal changes) for BMI, glycaemia, systolic blood pressure, total and HDL cholesterol could then be estimated through statistical analysis. These growth factors are conditional on several individual characteristics including age, sex, ethnicity, smoking, family history of CVD, and family history of type 2 diabetes. Deprivation was excluded from the final analysis because it was not associated with the growth models, and it estimated counter-intuitive coefficients.

Unobservable heterogeneity between individual growth factors not explained by patient characteristics was incorporated into the growth models as random error terms. Correlation between the random error terms for glycaemia, total cholesterol, HDL cholesterol and systolic blood pressure was estimated from the Whitehall II cohort. This means that in the simulation, an individual with a higher growth rate for glycaemia is more likely to have a higher growth rate of total cholesterol and systolic blood pressure.

The baseline observations for BMI, HbA1c, systolic blood pressure, cholesterol and HDL cholesterol were extracted from the Health Survey for England 2011 in order to simulate a representative sample. The predicted intercept for these metabolic risk factors was estimated using the Whitehall II analysis to give population estimates of the individuals' starting values, conditional on their characteristics. The difference between the simulated and observed baseline risk factors was taken to estimate the individuals' random deviation from the population expectation. The individual random error in the slope trajectory was sampled from a conditional multivariate normal distribution to allow correlation between the intercept and slope random errors.

Following a diagnosis of diabetes in the simulation all individuals experience an initial fall in HbA1c due to changes in diet and lifestyle as observed in the UKPDS trial (14). The expected change in HbA1c conditional on HbA1c at diagnosis was estimated by fitting a simple linear regression to three aggregate outcomes reported in the study. These showed that the change in HbA1c increases for higher HbA1c scores at diagnosis. The regression parameters to estimate change in HbA1c are reported in Table 15.

**Table 15: Estimated change in HbA1c following diabetes diagnosis**

|                           | Mean    | Standard error |
|---------------------------|---------|----------------|
| Change in HbA1c Intercept | -2.9465 | 0.0444513      |
| HbA1c at baseline         | 0.5184  | 0.4521958      |

After this initial reduction in HbA1c the longitudinal trajectory of HbA1c is estimated using the UKPDS outcomes model (15) rather than the Whitehall II statistical analysis. The UKPDS dataset is made up of a newly diagnosed diabetic population. As part of the UKPDS Outcomes model, longitudinal trial data were analysed using a random effects model, which means that unobservable differences between individuals are accounted for in the analysis. The model can be used to predict HbA1c over time from the point of diagnosis. The coefficients of the model are reported in Table 16.

**Table 16: Coefficient estimates for HbA1c estimated from UKPDS data**

|                                            | Mean Coefficient | Coefficient standard error |
|--------------------------------------------|------------------|----------------------------|
| Intercept                                  | -0.024           | 0.017                      |
| Log transformation of year since diagnosis | 0.144            | 0.009                      |
| Binary variable for year after diagnosis   | -0.333           | 0.05                       |
| HbA1c score in last period                 | 0.759            | 0.004                      |
| HbA1c score at diagnosis                   | 0.085            | 0.004                      |

It was important to maintain heterogeneity in the individual glycaemic trajectories before and after diagnosis. Therefore, the random error terms used to determine individual trajectories in glycaemia before diagnosis were used to induce random noise in the trajectory after diagnosis. We sampled the

expected random error term for each individual after diagnosis conditional on pre-diagnosis slope, assuming a 0.8 correlation between these values.

The epidemiological literature for many of the health outcomes included in the model treats diabetes diagnosis as a discrete health state, rather than a continuous risk function conditional on HbA1c. This poses two methodological challenges in type 2 diabetes modelling. Firstly, diabetes diagnosis is complex with several tests and a high proportion of undetected diagnoses. Therefore, it is not necessarily an appropriate indicator of risk in the model. Secondly, we would prefer to model the relationship on a continuous scale to avoid artificial steps in risk; however the evidence is not always available to describe risk on a continuous scale. We took two main steps to reduce the impact of this on our model. Firstly, we used the HbA1c threshold of 6.5% to indicate type-2 diabetes regardless of detection, and to ensure consistency in natural history across interventions and counterfactuals. Secondly, the QRISK2 model was adapted to incorporate continuous risk by HbA1c.

## **METABOLIC RISK FACTOR SCREENING, DIAGNOSIS AND TREATMENT**

It is assumed that individuals eligible for anti-hypertensive treatment or statins will be identified through opportunistic screening if they meet certain criteria and attend the GP for at least one visit in the simulation period.

1. Individuals with a history of cardiovascular disease;
2. Individuals with a major microvascular event (foot ulcer, blindness, renal failure or amputation);
3. Individuals with diagnosed diabetes;
4. Individuals with systolic blood pressure greater than 160mmHg.

Individuals may also be detected with diabetes through opportunistic screening if the following criteria are met.

1. Individuals with a history of cardiovascular disease;
2. Individuals with a major microvascular event (foot ulcer, blindness, renal failure or amputation);
3. At baseline individuals are assigned an HbA1c threshold above which diabetes is detected opportunistically, individuals with an HbA1c above their individual threshold will attend the GP to be diagnosed with diabetes. The threshold is sampled from the distribution of HbA1c tests in a cohort of recently diagnosed patients in clinical practice (16).

The base case has been designed to represent a health system with moderate levels of screening for hypertension, diabetes, and dyslipidaemia.

It is assumed that there are three, non-mutually exclusive outcomes from the vascular checks or opportunistic screening. Firstly, that the patient receives statins to reduce cardiovascular risk. Secondly, that the patient has high blood pressure and should be treated with anti-hypertensive medication. Thirdly, the model evaluates whether the blood glucose test indicates a diagnosis with type 2 diabetes. The following threshold estimates were used to determine these outcomes.

1. Statins are initiated if the individual has greater than or equal to 20% 10 year CVD risk estimated from the QRISK2 2012 algorithm (17).
2. Anti-hypertensive treatment is initiated if systolic blood pressure is greater than 160. If the individual has a history of CVD, diabetes or a CVD risk >20%, the threshold for systolic blood pressure is 140 (18).
3. Type 2 diabetes is diagnosed if the individual has an HbA1c test greater than 6.5. In the base case it is assumed that FPG and 2-hr glucose are not used for diabetes diagnosis. However, future adaptations of the model could use these tests for diagnosis.

It is assumed within the model that if initiated, statins are effective in reducing an individual's total cholesterol, and so an average effect is applied to all patients being prescribed them. A recent HTA reviewed the literature on the effectiveness and cost-effectiveness of statins in individuals with acute coronary syndrome (20). This report estimated the change in LDL cholesterol for four statin treatments and doses compared with placebo from a Bayesian meta-analysis. The analysis estimated a reduction in LDL cholesterol of -1.45 for simvastatin. This estimate was used to describe the effect of statins in reducing total cholesterol. It was assumed that the effect was instantaneous upon receiving statins and maintained as long as the individual receives statins. It was also assumed that individuals receiving statins no longer experienced annual changes in cholesterol. HDL cholesterol was assumed constant over time if patients received statins.

Non-adherence to statin treatment is a common problem. Two recent HTAs reviewed the literature on continuation and compliance with statin treatment. They both concluded that there was a lack of adequate reporting, but that the proportion of patients fully compliant with treatment appears to decrease with time, particularly in the first 12 months after initiating treatment, and can fall below 60% after five years (20;21). Although a certain amount of non-compliance is included within trial data, clinical trials are not considered to be representative of continuation and compliance in general practice. A yearly reduction in statin compliance used in the HTA analysis is reported in Table 17. It is based on the published estimate of compliance for the first five years of statin treatment for primary



prevention in general clinical practice (21). Compliance declines to a minimum of 65% after five years of treatment. It is assumed that there is no further drop after five years.

**Table 17: Proportion of patients assumed to be compliant with statin treatment, derived from Table 62 in (20)**

| Year after statin initiation | 1   | 2   | 3    | 4    | 5    |
|------------------------------|-----|-----|------|------|------|
| Proportion compliant         | 0.8 | 0.7 | 0.68 | 0.65 | 0.65 |

In the simulation, it is assumed in the base case that only 65% of individuals initiate statins when they are deemed eligible. However those that initiate statins remain on statins for their lifetime. Those who refuse statins may be prescribed them again at a later date.

The change in systolic blood pressure following antihypertensive treatment was obtained from a meta-analysis of anti-hypertensive treatments (22). This study identified an average change in systolic blood pressure of -8.4 mmHg for monotherapy with calcium channel blockers. It is assumed that this reduction in systolic blood pressure is maintained for as long as the individual receives anti-hypertensive treatment. For simplicity we do not assume that the individual switches between anti-hypertensive treatments over time. Once an individual is receiving anti-hypertensive treatment it is assumed that their systolic blood pressure is stable and does not change over time. Non-adherence and discontinuation are not modelled for anti-hypertensives.

## COMORBID OUTCOMES AND MORTALITY

In every model cycle individuals within the model are evaluated to determine whether they have a clinical event, including mortality, within the cycle period. In each case the simulation estimates the probability that an individual has the event and uses a random number draw to determine whether the event occurred.

### CARDIOVASCULAR DISEASE

#### First Cardiovascular event

Several statistical models for cardiovascular events were identified in a review of economic evaluations for diabetes prevention (4). The UKPDS outcomes model (23), Framingham risk equation (24) and QRISK2 (25) have all been used in previous models to estimate cardiovascular events. The Framingham risk equation was not adopted because, unlike the QRISK2 model, it is not estimated from a UK population. The UKPDS outcomes model would be ideally suited to estimate the risk of cardiovascular disease in a population diagnosed with type 2 diabetes. Whilst this is an important outcome of the cost-effectiveness model, there was concern that it would not be representative of individuals with normal glucose tolerance or impaired glucose regulation. It was important that

reductions in cardiovascular disease risk in these populations were represented to capture the population-wide benefits of public health interventions. The QRISK2 model was selected for use in the cost-effectiveness model because it is a validated model of cardiovascular risk in a UK population that could be used to generate probabilities for diabetic and non-diabetic populations. We considered using the UKPDS outcomes model specifically to estimate cardiovascular risk in patients with type 2 diabetes. However, it would not be possible to control for shifts in absolute risk generated by the different risk scores due to different baselines and covariates. This would lead to some individuals experiencing counterintuitive and favourable shifts in risk after onset of type 2 diabetes. Therefore, we decided to use diabetes as a covariate adjustment to the QRISK2 model to ensure that the change in individual status was consistent across individuals.

We accessed the 2012 version of the QRISK from the website (26). The QRISK2 equation estimates the probability of a cardiovascular event in the next year conditional on ethnicity, smoking status, age, BMI, ratio of total/HDL cholesterol, Townsend score, atrial fibrillation, rheumatoid arthritis, renal disease, hypertension, diabetes, and family history of cardiovascular disease. Data on all these variables was available from the HSE 2011. Table 18 reports the coefficient estimates for the QRISK2 algorithm. The standard errors were not reported within the open source code. Where possible, standard errors were imputed from a previous publication of the risk equation (27). Coefficients that were not reported in this publication were assumed to have standard errors of 20%.

**Table 18: Coefficients from the 2012 QRISK2 risk equation and estimate standard errors**

| Covariates             | Estimated coefficients adjusting for individual characteristics |                |           |        |                         |         |                |         |                |
|------------------------|-----------------------------------------------------------------|----------------|-----------|--------|-------------------------|---------|----------------|---------|----------------|
|                        | Women                                                           |                | Men       |        | Interaction terms       | Women   |                | Men     |                |
|                        | Mean                                                            | Standard error | Mean      | Mean   |                         | Mean    | Standard error | Mean    | Standard error |
| White                  | 0.0000                                                          | 0.0000         | 0.0000    | 0.0000 | Age1*former smoker      | 0.1774  | 0.035          | -3.881  | 0.776          |
| Indian                 | 0.2163                                                          | 0.0537         | 0.3163    | 0.0425 | Age1*light smoker       | -0.3277 | 0.066          | -16.703 | 3.341          |
| Pakistani              | 0.6905                                                          | 0.0698         | 0.6092    | 0.0547 | Age1*moderate smoker    | -1.1533 | 0.231          | -15.374 | 3.075          |
| Bangladeshi            | 0.3423                                                          | 0.1073         | 0.5958    | 0.0727 | Age1*Heavy smoker       | -1.5397 | 0.308          | -17.645 | 3.529          |
| Other Asian            | 0.0731                                                          | 0.1071         | 0.1142    | 0.0845 | Age1*AF                 | -4.6084 | 0.922          | -7.028  | 1.406          |
| Caribbean              | -0.0989                                                         | 0.0619         | -0.3489   | 0.0641 | Age1*renal disease      | -2.6401 | 0.528          | -17.015 | 3.403          |
| Black African          | -0.2352                                                         | 0.1275         | -0.3604   | 0.1094 | Age1*hypertension       | -2.2480 | 0.450          | 33.963  | 6.793          |
| Chinese                | -0.2956                                                         | 0.1721         | -0.2666   | 0.1538 | Age1*Diabetes           | -1.8452 | 0.369          | 12.789  | 2.558          |
| Other                  | -0.1010                                                         | 0.0793         | -0.1208   | 0.0734 | Age1*BMI                | -3.0851 | 0.617          | 3.268   | 0.654          |
| Non-smoker             | 0.0000                                                          | 0.0000         | 0.0000    | 0.0000 | Age1*family history CVD | -0.2481 | 0.050          | -17.922 | 3.584          |
| Former smoker          | 0.2033                                                          | 0.0152         | 0.2684    | 0.0108 | Age1*SBP                | -0.0132 | 0.003          | -0.151  | 0.030          |
| Light smoker           | 0.4820                                                          | 0.0220         | 0.5005    | 0.0166 | Age1*Townsend           | -0.0369 | 0.007          | -2.550  | 0.510          |
| Moderate smoker        | 0.6126                                                          | 0.0178         | 0.6375    | 0.0148 | Age2*former smoker      | -0.0051 | 0.001          | 7.971   | 1.594          |
| Heavy smoker           | 0.7481                                                          | 0.0194         | 0.7424    | 0.0143 | Age2*light smoker       | -0.0005 | 0.000          | 23.686  | 4.737          |
| Age 1*                 | 5.0327                                                          |                | 47.3164   |        | Age2*moderate smoker    | 0.0105  | 0.002          | 23.137  | 4.627          |
| Age 2*                 | -0.0108                                                         |                | -101.2362 |        | Age2*Heavy smoker       | 0.0155  | 0.003          | 26.867  | 5.373          |
| BMI*                   | -0.4724                                                         | 0.0423         | 0.5425    | 0.0299 | Age2*AF                 | 0.0507  | 0.010          | 14.452  | 2.890          |
| Ratio Total / HDL chol | 0.1326                                                          | 0.0044         | 0.1443    | 0.0022 | Age2*renal disease      | 0.0343  | 0.007          | 28.270  | 5.654          |
| SBP                    | 0.0106                                                          | 0.0045         | 0.0081    | 0.0046 | Age2*hypertension       | 0.0258  | 0.005          | -18.817 | 3.763          |
| Townsend               | 0.0597                                                          | 0.0068         | 0.0365    | 0.0048 | Age2*Diabetes           | 0.0180  | 0.004          | 0.963   | 0.193          |
| AF                     | 1.3261                                                          | 0.0310         | 0.7547    | 0.1018 | Age2*BMI                | 0.0345  | 0.007          | 10.551  | 2.110          |

|                                                                                                                                    |        |        |        |        |                            |         |       |        |       |
|------------------------------------------------------------------------------------------------------------------------------------|--------|--------|--------|--------|----------------------------|---------|-------|--------|-------|
| Rheumatoid arthritis                                                                                                               | 0.3626 | 0.0319 | 0.3089 | 0.0445 | Age2*family history<br>CVD | -0.0062 | 0.001 | 26.605 | 5.321 |
| Renal disease                                                                                                                      | 0.7636 | 0.0639 | 0.7441 | 0.0702 | Age2*SBP                   | 0.0000  | 0.000 | 0.291  | 0.058 |
| Hypertension                                                                                                                       | 0.5421 | 0.0115 | 0.4978 | 0.0112 | Age2*Townsend              | -0.0011 | 0.000 | 3.007  | 0.601 |
| Diabetes                                                                                                                           | 0.8940 | 0.0199 | 0.7776 | 0.0175 |                            |         |       |        |       |
| Family history of<br>CVD                                                                                                           | 0.5997 | 0.0122 | 0.6965 | 0.0111 |                            |         |       |        |       |
| AF Atrial Fibrillation CVD Cardiovascular disease SBP systolic blood pressure * covariates transformed with fractional polynomials |        |        |        |        |                            |         |       |        |       |

The QRISK2 risk equation can be used to calculate the probability of a cardiovascular event including coronary heart disease (angina or myocardial infarction), stroke, transient ischaemic attacks and fatality due to cardiovascular disease. The equation estimates the probability of a cardiovascular event in the next period conditional on the coefficients listed in Table 18. The equation for the probability of an event in the next period is calculated as

$$p(Y = 1) = 1 - S(1)^\theta$$

$$\theta = \sum \beta X$$

The probability of an event is calculated from the survival function at 1 year raised to the power of  $\theta$ , where  $\theta$  is the sum product of the coefficients reported in Table 18 multiplied by the individual's characteristics. Underlying survival curves for men and women were extracted from the QRISK2 open source file. Mean estimates for the continuous variables were also reported in the open source files.

We modified the QRISK assumptions regarding the relationship between IGR, diabetes and cardiovascular disease. Firstly, we assumed that individuals with HbA1c>6.5 have an increased risk of cardiovascular disease even if they have not received a formal diagnosis. Secondly, risk of cardiovascular disease was assumed to increase with HbA1c for test results greater than 6.5 to reflect observations from the UKPDS that HbA1c increases the risk of MI and Stroke (23). Thirdly, prior to type 2 diabetes (HbA1c>6.5) HbA1c is linearly associated with cardiovascular disease. A study from the EPIC Cohort has found that a unit increase in HbA1c increases the risk of coronary heart disease by a hazard ratio of 1.25, after adjustment for other risk factors (28). Individuals with an HbA1c greater than the mean HbA1c observed in the HSE 2011 cohort were at greater risk of CVD than those with an HbA1c lower than the HSE mean.

The QRISK algorithm identifies which individuals experience a cardiovascular event but does not specify the nature of the event. The nature of the cardiovascular event was determined independently. A targeted search of recent Health Technology appraisals of cardiovascular disease was performed to identify a model for the progression of cardiovascular disease following a first event. All QRISK events are assigned to a specific diagnosis according to age and sex specific distributions of

cardiovascular events used in a previous Health Technology Assessment (HTA) (21). Table 19 reports the probability of cardiovascular outcomes by age and gender.

**Table 19: The probability distribution of cardiovascular events by age and gender**

|       | Age   | Stable angina | Unstable angina | MI rate | Fatal CHD | TIA   | Stroke | Fatal CVD |
|-------|-------|---------------|-----------------|---------|-----------|-------|--------|-----------|
| Men   | 45-54 | 0.307         | 0.107           | 0.295   | 0.071     | 0.060 | 0.129  | 0.030     |
|       | 55-64 | 0.328         | 0.071           | 0.172   | 0.086     | 0.089 | 0.206  | 0.048     |
|       | 65-74 | 0.214         | 0.083           | 0.173   | 0.097     | 0.100 | 0.270  | 0.063     |
|       | 75-84 | 0.191         | 0.081           | 0.161   | 0.063     | 0.080 | 0.343  | 0.080     |
|       | 85+   | 0.214         | 0.096           | 0.186   | 0.055     | 0.016 | 0.351  | 0.082     |
| Women | 45-54 | 0.325         | 0.117           | 0.080   | 0.037     | 0.160 | 0.229  | 0.054     |
|       | 55-64 | 0.346         | 0.073           | 0.092   | 0.039     | 0.095 | 0.288  | 0.067     |
|       | 65-74 | 0.202         | 0.052           | 0.121   | 0.081     | 0.073 | 0.382  | 0.090     |
|       | 75-84 | 0.149         | 0.034           | 0.102   | 0.043     | 0.098 | 0.464  | 0.109     |
|       | 85+   | 0.136         | 0.029           | 0.100   | 0.030     | 0.087 | 0.501  | 0.117     |

### Subsequent Cardiovascular events

After an individual has experienced a cardiovascular event, it is not possible to predict the transition to subsequent cardiovascular events using QRISK2. Instead, as with assigning first CVD events, the probability of subsequent events was estimated from the HTA evaluating statins (21). This study reported the probability of future events, conditional on the nature of the previous event. Table 20 to Table 24 report the probabilities within a year of transitioning from stable angina, unstable angina, myocardial infarction (MI), transient ischemic attack (TIA) or stroke for individuals in different age groups. The tables suggests that, for example 99.46% of individuals with stable angina will remain in the stable angina state, but 0.13%, 0.32% and 0.01% will progress to unstable angina, MI or death from coronary heart disease (CHD) respectively.

**Table 20: Probability of cardiovascular event conditional on age and status of previous event (age 45-54)**

| Age 45-54 |                                      | To            |                   |                   |        |        |        |          |          |           |           |
|-----------|--------------------------------------|---------------|-------------------|-------------------|--------|--------|--------|----------|----------|-----------|-----------|
|           |                                      | Stable angina | Unstable angina 1 | Unstable angina 2 | MI 1   | MI 2   | TIA    | Stroke 1 | Stroke 2 | CHD death | CVD death |
| From      | Stable angina                        | 0.9946        | 0.0013            | 0                 | 0.0032 | 0      | 0      | 0        | 0        | 0.0009    | 0         |
|           | Unstable angina (1 <sup>st</sup> yr) | 0             | 0                 | 0.9127            | 0.0495 | 0      | 0      | 0        | 0        | 0.0362    | 0.0016    |
|           | Unstable angina (subsequent)         | 0             | 0                 | 0.9729            | 0.0186 | 0      | 0      | 0        | 0        | 0.0081    | 0.0004    |
|           | MI (1 <sup>st</sup> yr)              | 0             | 0                 | 0                 | 0.128  | 0.8531 | 0      | 0.0015   | 0        | 0.0167    | 0.0007    |
|           | MI (subsequent)                      | 0             | 0                 | 0                 | 0.0162 | 0.978  | 0      | 0.0004   | 0        | 0.0052    | 0.0002    |
|           | TIA                                  | 0             | 0                 | 0                 | 0.0016 | 0      | 0.9912 | 0.0035   | 0        | 0.0024    | 0.0013    |
|           | Stroke (1 <sup>st</sup> yr)          | 0             | 0                 | 0                 | 0.0016 | 0      | 0      | 0.0431   | 0.9461   | 0.0046    | 0.0046    |
|           | Stroke (subsequent)                  | 0             | 0                 | 0                 | 0.0016 | 0      | 0      | 0.0144   | 0.9798   | 0.0021    | 0.0021    |

MI Myocardial Infarction; TIA Transient Ischemic Attack; CHD Coronary Heart Disease; CVD Cerebrovascular disease

**Table 21: Probability of cardiovascular event conditional on age and status of previous event (age 55-64)**

| Age 55-64 |                                      | To            |                   |                   |        |        |        |          |          |           |           |
|-----------|--------------------------------------|---------------|-------------------|-------------------|--------|--------|--------|----------|----------|-----------|-----------|
|           |                                      | Stable angina | Unstable angina 1 | Unstable angina 2 | MI 1   | MI 2   | TIA    | Stroke 1 | Stroke 2 | CHD death | CVD death |
| From      | Stable angina                        | 0.9880        | 0.0033            | 0                 | 0.0057 | 0      | 0      | 0        | 0        | 0.0030    | 0         |
|           | Unstable angina (1 <sup>st</sup> yr) | 0             | 0                 | 0.8670            | 0.0494 | 0      | 0      | 0        | 0        | 0.0800    | 0.0036    |
|           | Unstable angina (subsequent)         | 0             | 0                 | 0.9415            | 0.0471 | 0      | 0      | 0        | 0        | 0.0109    | 0.0005    |
|           | MI (1 <sup>st</sup> yr)              | 0             | 0                 | 0                 | 0.1087 | 0.8409 | 0      | 0.0047   | 0        | 0.0439    | 0.0019    |
|           | MI (subsequent)                      | 0             | 0                 | 0                 | 0.0183 | 0.9678 | 0      | 0.0015   | 0        | 0.0119    | 0.0005    |
|           | TIA                                  | 0             | 0                 | 0                 | 0.0029 | 0      | 0.9666 | 0.0159   | 0        | 0.0079    | 0.0068    |
|           | Stroke (1 <sup>st</sup> yr)          | 0             | 0                 | 0                 | 0.0029 | 0      | 0      | 0.0471   | 0.9159   | 0.0171    | 0.0171    |
|           | Stroke (subsequent)                  | 0             | 0                 | 0                 | 0.0029 | 0      | 0      | 0.0205   | 0.9622   | 0.0072    | 0.0072    |

MI Myocardial Infarction; TIA Transient Ischemic Attack; CHD Coronary Heart Disease; CVD Cerebrovascular disease

**Table 22: Probability of cardiovascular event conditional on age and status of previous event (age 65-74)**

| Age 65-74 |                                      | To            |                   |                   |        |        |        |          |          |           |           |
|-----------|--------------------------------------|---------------|-------------------|-------------------|--------|--------|--------|----------|----------|-----------|-----------|
|           |                                      | Stable angina | Unstable angina 1 | Unstable angina 2 | MI 1   | MI 2   | TIA    | Stroke 1 | Stroke 2 | CHD death | CVD death |
| From      | Stable angina                        | 0.9760        | 0.0060            | 0                 | 0.0110 | 0      | 0      | 0        | 0        | 0.0070    | 0         |
|           | Unstable angina (1 <sup>st</sup> yr) | 0             | 0                 | 0.8144            | 0.0479 | 0      | 0      | 0        | 0        | 0.1319    | 0.0059    |
|           | Unstable angina (subsequent)         | 0             | 0                 | 0.9021            | 0.0844 | 0      | 0      | 0        | 0        | 0.0129    | 0.0006    |
|           | MI (1 <sup>st</sup> yr)              | 0             | 0                 | 0                 | 0.0948 | 0.8106 | 0      | 0.0098   | 0        | 0.0811    | 0.0036    |
|           | MI (subsequent)                      | 0             | 0                 | 0                 | 0.0183 | 0.9585 | 0      | 0.0032   | 0        | 0.0191    | 0.0008    |
|           | TIA                                  | 0             | 0                 | 0                 | 0.0055 | 0      | 0.9174 | 0.0423   | 0        | 0.0185    | 0.0163    |
|           | Stroke (1 <sup>st</sup> yr)          | 0             | 0                 | 0                 | 0.0055 | 0      | 0      | 0.0485   | 0.8673   | 0.0393    | 0.0393    |
|           | Stroke (subsequent)                  | 0             | 0                 | 0                 | 0.0055 | 0      | 0      | 0.0237   | 0.9412   | 0.0148    | 0.0148    |

MI Myocardial Infarction; TIA Transient Ischemic Attack; CHD Coronary Heart Disease; CVD Cerebrovascular disease

**Table 23: Probability of cardiovascular event conditional on age and status of previous event (age 75-84)**

| Age 75-84 |                                      | To            |                   |                   |        |        |        |          |          |           |           |
|-----------|--------------------------------------|---------------|-------------------|-------------------|--------|--------|--------|----------|----------|-----------|-----------|
|           |                                      | Stable angina | Unstable angina 1 | Unstable angina 2 | MI 1   | MI 2   | TIA    | Stroke 1 | Stroke 2 | CHD death | CVD death |
| From      | Stable angina                        | 0.9680        | 0.0087            | 0                 | 0.0163 | 0      | 0      | 0        | 0        | 0.0070    | 0         |
|           | Unstable angina (1 <sup>st</sup> yr) | 0             | 0                 | 0.7366            | 0.0448 | 0      | 0      | 0        | 0        | 0.2093    | 0.0093    |
|           | Unstable angina (subsequent)         | 0             | 0                 | 0.8360            | 0.1484 | 0      | 0      | 0        | 0        | 0.0149    | 0.0007    |
|           | MI (1 <sup>st</sup> yr)              | 0             | 0                 | 0                 | 0.0794 | 0.7502 | 0      | 0.0200   | 0        | 0.1440    | 0.0064    |
|           | MI (subsequent)                      | 0             | 0                 | 0                 | 0.0171 | 0.9466 | 0      | 0.0066   | 0        | 0.0286    | 0.0013    |
|           | TIA                                  | 0             | 0                 | 0                 | 0.0082 | 0      | 0.8514 | 0.0878   | 0        | 0.0185    | 0.0342    |
|           | Stroke (1 <sup>st</sup> yr)          | 0             | 0                 | 0                 | 0.0082 | 0      | 0      | 0.0471   | 0.7736   | 0.0856    | 0.0856    |
|           | Stroke (subsequent)                  | 0             | 0                 | 0                 | 0.0082 | 0      | 0      | 0.0251   | 0.9107   | 0.0280    | 0.0280    |

MI Myocardial Infarction; TIA Transient Ischemic Attack; CHD Coronary Heart Disease; CVD Cerebrovascular disease

**Table 24: Probability of cardiovascular event conditional on age and status of previous event (age 85-94)**

| Age 85-94 |                                      | To            |                   |                   |        |        |        |          |          |           |           |
|-----------|--------------------------------------|---------------|-------------------|-------------------|--------|--------|--------|----------|----------|-----------|-----------|
|           |                                      | Stable angina | Unstable angina 1 | Unstable angina 2 | MI 1   | MI 2   | TIA    | Stroke 1 | Stroke 2 | CHD death | CVD death |
| From      | Stable angina                        | 0.9600        | 0.0114            | 0                 | 0.0216 | 0      | 0      | 0        | 0        | 0.0070    | 0         |
|           | Unstable angina (1 <sup>st</sup> yr) | 0             | 0                 | 0.6315            | 0.0396 | 0      | 0      | 0        | 0        | 0.3149    | 0.0140    |
|           | Unstable angina (subsequent)         | 0             | 0                 | 0.7255            | 0.2568 | 0      | 0      | 0        | 0        | 0.0170    | 0.0008    |
|           | MI (1 <sup>st</sup> yr)              | 0             | 0                 | 0                 | 0.0623 | 0.6498 | 0      | 0.0380   | 0        | 0.2393    | 0.0106    |
|           | MI (subsequent)                      | 0             | 0                 | 0                 | 0.0148 | 0.9311 | 0      | 0.0124   | 0        | 0.0399    | 0.0018    |
|           | TIA                                  | 0             | 0                 | 0                 | 0.0108 | 0      | 0.7967 | 0.1286   | 0        | 0.0185    | 0.0453    |
|           | Stroke (1 <sup>st</sup> yr)          | 0             | 0                 | 0                 | 0.0108 | 0      | 0      | 0.0409   | 0.6153   | 0.1665    | 0.1665    |
|           | Stroke (subsequent)                  | 0             | 0                 | 0                 | 0.0108 | 0      | 0      | 0.0248   | 0.8655   | 0.0494    | 0.0494    |

MI Myocardial Infarction; TIA Transient Ischemic Attack; CHD Coronary Heart Disease; CVD Cerebrovascular disease

### Congestive Heart Failure

The review of previous economic evaluations of diabetes prevention cost-effectiveness studies found that only a small number of models had included congestive heart failure as a separate outcome. Discussion with the stakeholder group identified that the UKPDS Outcomes model would be an appropriate risk model for congestive heart failure in type 2 diabetes patients. However, it was suggested that this would not be an appropriate risk equation for individuals with normal glucose tolerance or impaired glucose tolerance. The Framingham risk equation was suggested as an alternative. The main limitation of this equation is that it is quite old and is based on a non-UK population. However, a citation search of this article did not identify a more recent or UK based alternative.

Congestive heart failure was included as a separate cardiovascular event because it was not included as an outcome of the QRISK2. The Framingham Heart Study has reported logistic regressions to estimate the 4 year probability of congestive heart failure for men and women (29). The equations included age, diabetes diagnosis (either formal diagnosis or HbA1c>6.5), BMI and systolic blood pressure to adjust risk based on individual characteristics. We used this risk equation to estimate the probability of congestive heart failure in the SPHR diabetes prevention model. Table 25 describes the covariates for the logit models to estimate the probability of congestive heart failure in men and women.

**Table 25: Logistic regression coefficients to estimate the 4-year probability of congestive heart failure from the Framingham study**

| Variables                                                                                                                                                                                                                                                                                                                               | Units    | Regression Coefficient | OR (95% CI)      | P     |
|-----------------------------------------------------------------------------------------------------------------------------------------------------------------------------------------------------------------------------------------------------------------------------------------------------------------------------------------|----------|------------------------|------------------|-------|
| <b>Men</b>                                                                                                                                                                                                                                                                                                                              |          |                        |                  |       |
| Intercept                                                                                                                                                                                                                                                                                                                               |          | -9.2087                |                  |       |
| Age                                                                                                                                                                                                                                                                                                                                     | 10 y     | 0.0412                 | 1.51 (1.31-1.74) | <.001 |
| Left ventricular hypertrophy                                                                                                                                                                                                                                                                                                            | Yes/no   | 0.9026                 | 2.47 (1.31-3.77) | <.001 |
| Heart rate                                                                                                                                                                                                                                                                                                                              | 10 bpm   | 0.0166                 | 1.18 (1.08-1.29) | <.001 |
| Systolic blood pressure                                                                                                                                                                                                                                                                                                                 | 20 mm Hg | 0.00804                | 1.17 (1.04-1.32) | 0.007 |
| Congenital heart disease                                                                                                                                                                                                                                                                                                                | Yes/no   | 1.6079                 | 4.99 (3.80-6.55) | <.001 |
| Valve disease                                                                                                                                                                                                                                                                                                                           | Yes/no   | 0.9714                 | 2.64 (1.89-3.69) | <.001 |
| Diabetes                                                                                                                                                                                                                                                                                                                                | Yes/no   | 0.2244                 | 1.25 (0.89-1.76) | 0.2   |
| <b>Women</b>                                                                                                                                                                                                                                                                                                                            |          |                        |                  |       |
| Intercept                                                                                                                                                                                                                                                                                                                               |          | -10.7988               |                  |       |
| Age                                                                                                                                                                                                                                                                                                                                     | 10 y     | 0.0503                 | 1.65 (1.42-1.93) | <.001 |
| left ventricular hypertrophy                                                                                                                                                                                                                                                                                                            | Yes/no   | 1.3402                 | 3.82 (2.50-5.83) | <.001 |
| Heart rate                                                                                                                                                                                                                                                                                                                              | 100 cL   | 0.0105                 | 1.11 (1.01-1.23) | 0.03  |
| Systolic blood pressure                                                                                                                                                                                                                                                                                                                 | 10 bpm   | 0.00337                | 1.07 (0.96-1.20) | 0.24  |
| congenital heart disease                                                                                                                                                                                                                                                                                                                | 20 mm Hg | 1.5549                 | 4.74 (3.49-6.42) | <.001 |
| Valve disease                                                                                                                                                                                                                                                                                                                           | Yes/no   | 1.3929                 | 4.03 (2.86-5.67) | <.001 |
| Diabetes                                                                                                                                                                                                                                                                                                                                | Yes/no   | 1.3857                 | 4.00 (2.78-5.74) | <.001 |
| BMI                                                                                                                                                                                                                                                                                                                                     | kg/m2    | 0.0578                 | 1.06 (1.03-1.09) | <.001 |
| Valve disease and diabetes                                                                                                                                                                                                                                                                                                              | Yes/no   | -0.986                 | 0.37 (0.18-0.78) | 0.009 |
| *OR indicates odds ratio; CI, confidence interval; LVH, left ventricular hypertrophy; CHD, congenital heart disease; and BMI, body mass index. Predicted probability of heart failure can be calculated as: $p = 1/(1+\exp(-x\beta))$ , where $x\beta = \text{Intercept} + \text{Sum (of regression coefficient*value of risk factor)}$ |          |                        |                  |       |

Many of the risk factors included in this risk equation were not simulated in the diabetes model. We adjusted the baseline odds of CHD to reflect the expected prevalence of these symptoms in a UK population.

The proportion of the UK population with left ventricular hypertrophy was assumed to be 5% in line with previous analyses of the Whitehall II cohort (30). The heart rate for men was assumed to be 63.0bpm and for women 65.6bpm based on data from previous Whitehall II cohort analyses (31). The prevalence of congenital heart disease was estimated from an epidemiology study in the North of England. The study reports the prevalence of congenital heart disease among live births which was used to estimate the adult prevalence (32). This may over-estimate the prevalence, because the life expectancy of births with congenital heart disease is reduced compared with the general population. However, given the low prevalence it is unlikely to impact on the results. The prevalence of valve disease was estimated from the Echocardiographic Heart of England Screening study (33).

Using the estimated population values, the intercept values were adjusted to account for the population risk in men and women. This resulted in a risk equation with age, systolic blood pressure, diabetes and BMI in women to describe the risk of congestive heart failure.

## MICROVASCULAR COMPLICATIONS

The review of previous economic evaluations identified that the UKPDS data was commonly used to estimate the incidence of microvascular complications (4). This data has the advantage of being estimated from a UK diabetic population. Given that the events described in the UKPDS outcomes model are indicative of late stage microvascular complications, we did not believe it was necessary to seek an alternative model that would be representative of an impaired glucose tolerance population.

We adopted a simple approach to modelling microvascular complications. We used both versions of the UKPDS Outcomes model to estimate the occurrence of major events relating to these complications, including renal failure, amputation, foot ulcer, and blindness (15;23). These have the greatest cost and utility impact compared with earlier stages of microvascular complications, so are more likely to have an impact on the SPHR diabetes prevention outcomes. As a consequence, we assumed that microvascular complications only occur in individuals with HbA1c>6.5. Whilst some individuals with hyperglycaemia (HbA1c>6.0) may be at risk of developing microvascular complications, it is unlikely that they will progress to renal failure, amputation or blindness before a diagnosis of diabetes. Importantly, we did not assume that only individuals who have a formal diagnosis of diabetes are at risk of these complications. This allows us to incorporate the costs of undetected diabetes into the simulation.

The UKPDS includes four statistical models to predict foot ulcers, amputation with no prior ulcer, amputation with prior ulcer and a second amputation (23). In order to simplify the simulation of neuropathy outcomes we consolidated the models for first amputation with and without prior ulcer into a single equation. The parametric survival models were used to generate estimates of the cumulative hazard in the current and previous period. From which the probability of organ damage being diagnosed was estimated.

$$p(\text{Death}) = 1 - \exp(H(t) - H(t - 1))$$

The functional form for the microvascular models included exponential and Weibull. The logistic model was also used to estimate the probability of an event over the annual time interval.

### **Retinopathy**

We used the UKPDS outcomes model v2 to estimate the incidence of blindness in individuals with HbA1c>6.5. The exponential model assumes a baseline hazard  $\lambda$ , which can be calculated from the model coefficients reported in Table 26 and the individual characteristics for  $\mathbf{X}$ .



$$\lambda = \exp(\beta_0 + X\beta_k)$$

**Table 26: Parameters of the UKPDS2 Exponential Blindness survival model**

|                   | <b>Mean coefficient</b> | <b>Standard error</b> | <b>Modified mean coefficient</b> |
|-------------------|-------------------------|-----------------------|----------------------------------|
| Lambda            | -11.607                 | 0.759                 | -10.967                          |
| Age at diagnosis  | 0.047                   | 0.009                 | 0.047                            |
| HbA1c             | 0.171                   | 0.032                 | 0.171                            |
| Heart rate        | 0.080                   | 0.039                 |                                  |
| SBP               | 0.068                   | 0.032                 | 0.068                            |
| White Blood Count | 0.052                   | 0.019                 |                                  |
| CHF History       | 0.841                   | 0.287                 | 0.841                            |
| IHD History       | 0.0610                  | 0.208                 | 0.061                            |

The age at diagnosis coefficient was multiplied by age in the current year if the individual had not been diagnosed with diabetes or by the age at diagnosis if the individual had received a diagnosis. The expected values for the risk factors not included in the SPHR model (heart rate and white blood count) were taken from Figure 3 of the UKPDS publication in which these are described (23). Assuming these mean values, it was possible to modify the baseline risk without simulating heart rate and white blood cell count.

### **Neuropathy**

We used the UKPDS outcomes model v2 to estimate the incidence of ulcer and amputation in individuals with HbA1c>6.5. The parameters of the ulcer and first amputation models are reported in Table 27.

**Table 27: Parameters of the UKPDS2 Exponential model for Ulcer, Weibull model for first amputation with no prior ulcer and exponential model for 1<sup>st</sup> amputation with prior ulcer**

|                     | Ulcer    |                | 1 <sup>st</sup> Amputation no prior ulcer |                | 1 <sup>st</sup> Amputation prior ulcer |                | 2 <sup>nd</sup> Amputation |                |
|---------------------|----------|----------------|-------------------------------------------|----------------|----------------------------------------|----------------|----------------------------|----------------|
|                     | Logistic |                | Weibull                                   |                | Exponential                            |                | Exponential                |                |
|                     | Mean     | Standard error | Mean                                      | Standard error | Mean                                   | Standard error | Mean                       | Standard error |
| lambda              | -11.295  | 1.130          | -14.844                                   | 1.205          | -0.881                                 | 1.39           | -3.455                     | 0.565          |
| Rho                 |          |                | 2.067                                     | 0.193          |                                        |                |                            |                |
| Age at diagnosis    | 0.043    | 0.014          | 0.023                                     | 0.011          | -0.065                                 | 0.027          |                            |                |
| Female              | -0.962   | 0.255          | -0.0445                                   | 0.189          |                                        |                |                            |                |
| Atrial fibrillation |          |                | 1.088                                     | 0.398          |                                        |                |                            |                |
| BMI                 | 0.053    | 0.019          |                                           |                |                                        |                |                            |                |
| HbA1c               | 0.160    | 0.056          | 0.248                                     | 0.042          |                                        |                | 0.127                      | 0.06           |
| HDL                 |          |                | -0.059                                    | 0.032          |                                        |                |                            |                |
| Heart rate          |          |                | 0.098                                     | 0.050          |                                        |                |                            |                |
| MMALB               |          |                | 0.602                                     | 0.180          |                                        |                |                            |                |
| PVD                 | 0.968    | 0.258          | 1.010                                     | 0.189          | 1.769                                  | 0.449          |                            |                |
| SBP                 |          |                | 0.086                                     | 0.043          |                                        |                |                            |                |
| WBC                 |          |                | 0.040                                     | 0.017          |                                        |                |                            |                |
| Stroke History      |          |                | 1.299                                     | 0.245          |                                        |                |                            |                |

The exponential model assumes a baseline hazard  $\lambda$ , which can be calculated from the model coefficients reported in Table 27 and the individual characteristics for  $\mathbf{X}$ .

$$\lambda = \exp(\beta_0 + \mathbf{X}\boldsymbol{\beta})$$

The Weibull model for amputation assumes a baseline hazard:

$$h(t) = \rho t^{\rho-1} \exp(\lambda)$$

where  $\lambda$  is also conditional on the coefficients and individual characteristics at time  $t$ . The logistic model for ulcer is described below.

$$\Pr(y = 1|\mathbf{X}) = \frac{\exp(\mathbf{X}\boldsymbol{\beta})}{1 + \exp(\mathbf{X}\boldsymbol{\beta})}$$

The ulcer and amputation models include a number of covariates that were not included in the simulation. As such it was necessary to adjust the statistical models to account for these measures. We estimated a value for the missing covariates and added the value multiplied by the coefficient to the baseline hazard.

The expected values for the risk factors not included in the SPHR diabetes prevention model (heart rate, white blood count, micro-/macroalbuminuria, peripheral vascular disease and atrial fibrillation)

were taken from Figure 3 of the UKPDS publication in which these are described (23). In the ulcer model we assumed that 2% of the population had peripheral vascular disease.

The amputation risk model with a history of ulcer was not included in the simulation, but was used to estimate an additional log hazard ratio to append onto the amputation model without a history of ulcer. The log hazard was estimated for each model assuming the same values for other covariates. The difference in the log hazard between the two models was used to approximate the log hazard ratio for a history of ulcer in the amputation model (10.241). The final model specifications are reported in Table 28.

**Table 28: Coefficients estimates for Ulcer and 1<sup>st</sup> Amputation**

|                  | Ulcer    |                | 1 <sup>st</sup> Amputation |                | 2 <sup>nd</sup> Amputation |                |
|------------------|----------|----------------|----------------------------|----------------|----------------------------|----------------|
|                  | Logistic |                | Weibull                    |                | Exponential                |                |
|                  | Mean     | Standard error | Mean                       | Standard error | Mean                       | Standard error |
| Lambda           | -11.276  | 1.13           | -13.954                    | 1.205          | -3.455                     | 0.565          |
| Rho              |          |                | 2.067                      | 0.193          |                            |                |
| Age at Diagnosis | 0.043    | 0.014          | 0.023                      | 0.011          |                            |                |
| Female           | -0.962   | 0.255          | -0.445                     | 0.189          |                            |                |
| BMI              | 0.053    | 0.019          |                            |                |                            |                |
| HbA1c            | 0.160    | 0.056          | 0.248                      | 0.042          | 0.127                      | 0.06           |
| HDL              |          |                | -0.059                     | 0.032          |                            |                |
| Stroke           |          |                | 1.299                      | 0.245          |                            |                |
| Foot Ulcer       |          |                | 10.241                     |                |                            |                |

## Nephropathy

We used the UKPDS outcomes model v1 to estimate the incidence of renal failure in individuals with HbA1c>6.5. Early validation analyses identified that the UKPDS v2 model implements in the SPHR model substantially overestimated the incidence of renal failure. The Weibull model for renal failure assumes a baseline hazard:

$$h(t) = \rho t^{\rho-1} \exp(\lambda)$$

where  $\lambda$  is also conditional on the coefficients and individual characteristics at time t. The parameters of the renal failure risk model are reported in Table 29.

**Table 29: Parameters of the UKPDS2 Weibull renal failure survival model**

|                 | Mean    | Standard error |
|-----------------|---------|----------------|
| Lambda          | -10.016 | 0.939          |
| Shape parameter | 1.865   | 0.387          |
| SBP             | 0.404   | 0.106          |
| BLIND History   | 2.082   | 0.551          |

## CANCER

The conceptual model identified breast cancer and colorectal cancer risk as being related to BMI. However, these outcomes were not frequently included in previous cost-effectiveness models for diabetes prevention. Discussion with stakeholders identified the EPIC Norfolk epidemiology cohort study as a key source of information about cancer risk in a UK population. Therefore, we searched publications from this cohort to identify studies reporting the incidence of these risks. In order to obtain the best quality evidence for the relationship between BMI and cancer risk we searched for a recent systematic review and meta-analysis using key terms ‘Body Mass Index’ and ‘Cancer’, filtering for meta-analysis studies.

### Breast cancer

Incidence rates for breast cancer in the UK were estimated from the European Prospective Investigation of Cancer (EPIC) cohort. This is a large multi-centre cohort study looking at diet and cancer. In 2004 the UK incidence of breast cancer by menopausal status was reported in a paper from this study investigating the relationship between body size and breast cancer (34). The estimates of the breast cancer incidence in the UK are reported in Table 30.

**Table 30: UK breast cancer incidence**

|                   | Number of Cases | Person Years | Mean BMI | Incidence Rate of per person-year | Reference |
|-------------------|-----------------|--------------|----------|-----------------------------------|-----------|
| UK pre-menopause  | 102             | 103114.6     | 24       | 0.00099                           | (34)      |
| UK post-menopause | 238             | 84214.6      | 24       | 0.00283                           | (34)      |

A large meta-analysis that included 221 prospective observational studies has reported relative risks of cancers per unit increase in BMI, including breast cancer by menopausal status (35). We included a risk adjustment in the model so that individuals with higher BMI have a higher probability of pre-and post-menopausal breast cancer (35). In the simulation we adjusted the incidence of breast cancer by multiplying the linear relative risk by the difference in the individual’s BMI and the average BMI reported in the EPIC cohort. The relative risk and confidence intervals per 5mg/m<sup>2</sup> increase in BMI are reported in Table 31.

**Table 31: Relative risk of Breast cancer by BMI**

|                   | Mean Relative risk | 2.5 <sup>th</sup> Confidence Interval | 97.5 <sup>th</sup> Confidence Interval | Reference |
|-------------------|--------------------|---------------------------------------|----------------------------------------|-----------|
| UK pre-menopause  | 0.89               | 0.84                                  | 0.94                                   | (35)      |
| UK post-menopause | 1.09               | 1.04                                  | 1.14                                   | (35)      |

## Colorectal cancer

Incidence rates for colorectal cancer in the UK were reported from the European Prospective Investigation of Cancer (EPIC) cohort. The UK incidence of colorectal cancer is reported by gender in a paper from this study investigating the relationship between body size and colon and rectal cancer (34). The estimates of the colorectal cancer incidence are reported in Table 32.

**Table 32: UK colorectal cancer incidence**

|        | Number of Cases | Person Years | Mean Age | Mean BMI | Incidence Rate of per person-year | Reference |
|--------|-----------------|--------------|----------|----------|-----------------------------------|-----------|
| Male   | 125             | 118468       | 53.1     | 25.4     | 0.00106                           | (36)      |
| Female | 145             | 277133       | 47.7     | 24.5     | 0.00052                           | (36)      |

The risk of colorectal cancer has been linked to obesity. We included a risk adjustment in the model to reflect observations that the incidence of breast cancer is increased in individuals with higher BMI. A large meta-analysis that included 221 prospective observational studies has reported relative risks of BMI and cancers, including colon cancer by gender (35). We selected linear relative risk estimates estimated from pooled European and Australian populations. In the simulation we adjusted the incidence of colorectal cancer by multiplying the relative risk by the difference in the individual's BMI and the average BMI reported in the EPIC cohort. The relative risk and confidence intervals per 5mg/m<sup>2</sup> increase in BMI are reported in Table 33.

**Table 33: Relative risk of colon cancer by BMI**

|                   | Mean Relative risk | 2.5 <sup>th</sup> Confidence Interval | 97.5 <sup>th</sup> Confidence Interval | Reference |
|-------------------|--------------------|---------------------------------------|----------------------------------------|-----------|
| UK pre-menopause  | 1.21               | 1.18                                  | 1.24                                   | (35)      |
| UK post-menopause | 1.04               | 1                                     | 1.07                                   | (35)      |

## OSTEOARTHRITIS

The stakeholder group requested that BMI and diabetes be included as independent risk factors for osteoarthritis based on recent evidence (37). Osteoarthritis had not been included as a health state in previous cost-effectiveness models. A search for studies using key words 'Diabetes', 'Osteoarthritis' and 'Cohort Studies' did not identify a UK based study with diabetes and BMI included as independent covariates in the risk model. The Bruneck cohort, a longitudinal study of inhabitants of a town in Italy reported diabetes and BMI as independent risk factors for osteoarthritis (37). The cohort may not be representative of the UK. However, the individuals are from a European country, the study has a large sample size and has estimated the independent effects of BMI and diabetes on the risk of osteoarthritis. No UK based studies identified in our searches met these requirements. The data used to estimate the incidence of osteoarthritis is reported in Table 34.

**Table 34: Incidence of osteoarthritis and estimated risk factors**

|             | No cases     | Person years | Mean BMI | Incidence rate | Reference                   |
|-------------|--------------|--------------|----------|----------------|-----------------------------|
| No diabetes | 73           | 13835        | 24.8     | 0.0053         | (37)                        |
|             | Hazard ratio | 2.5th        | 97.5th   |                | Reference                   |
| HR Diabetes | 2.06         | 1.11         | 3.84     |                | (37)                        |
| HR BMI      | 1.076        | 1.023        | 1.133    |                | (37) Personal communication |

## DEPRESSION

Depression was not included as a health state in previous cost-effectiveness models for diabetes prevention. However, a member of the stakeholder group identified that a relationship between diabetes and depression was included in the CORE diabetes treatment model (38). With this in mind, we decided to include depression as a health state in the model, but not to model its severity.

Some individuals enter the simulation with depression at baseline according to individual responses in the Health Survey for England 2011 questionnaire. Depression is described as a chronic state from which individuals do not completely remit. We did not estimate the effect of depression on the longitudinal changes for BMI, glycaemia, systolic blood pressure and cholesterol. As a consequence it was not possible to relate the impact of depression to the incidence of diabetes and CVD risk.

In the simulation, individuals can develop depression in any cycle of the model. The baseline incidence of depression among all individuals without a history of depression was estimated from a study examining the bidirectional association between depressive symptoms and type 2 diabetes (39). Although the study was not from a UK population, the US cohort included ethnically diverse men and women aged 45 to 84 years. We assumed that diagnosis of diabetes and/or cardiovascular disease increases the incidence of depression in individuals who do not have depression at baseline. We identified a method for inflating risk of depression for individuals with diabetes from the US cohort study described above (39). The risk of depression in individuals who have had a stroke was also inflated according to a US cohort study (40). Odds of depression and odds ratios for inflated risk of depression due to diabetes or stroke are presented in Table 35.

**Table 35: Baseline incidence of depression**

| Baseline Risk of depression  | Mean   | 2.5 <sup>th</sup> CI | 97.5th |
|------------------------------|--------|----------------------|--------|
| Depression cases in NGT      | 336    |                      |        |
| Person years                 | 9139   |                      |        |
| Odds of depression           | 0.0382 |                      |        |
| Log odds of depression       | -3.266 |                      |        |
| Inflated risk for Diabetes   |        |                      |        |
| Odds ratio of diabetes       | 1.52   | 1.09                 | 2.12   |
| Log odds ratio of diabetes   | 0.419  |                      |        |
| Inflate risk of stroke       |        |                      |        |
| Odds ratio of stroke         | 6.3    | 1.7                  | 23.2   |
| Log odds ratio stroke        | 1.8406 |                      |        |
| NGT Normal Glucose Tolerance |        |                      |        |

## MORTALITY

### Cardiovascular Mortality

Cardiovascular mortality is included as an event within the QRISK2 and the probability of subsequent cardiovascular events obtained from an HTA assessing statins (21) as described in the cardiovascular disease section above.

### Cancer Mortality

Cancer mortality rates were obtained from the Office of National statistics (41). The ONS report one and five year net survival rates for various cancer types, by age group and gender. Net survival was an estimate of the probability of survival from the cancer alone. It can be interpreted as the survival of cancer patients after taking into account the background mortality that the patients would have experienced if they had not had cancer.

The age-adjusted 5-year survival rate for breast cancer and colorectal cancer were used to estimate an annual risk of mortality assuming a constant rate of mortality. We assume that the mortality rate does not increase due to cancer beyond 5 years after cancer diagnosis. The five year survival rate for breast cancer is 84.3%, which translated into a 3.37% annual probability of death from breast cancer. The five year survival rate for persons with colorectal cancer is 55.3%, which translated into an 11.16% annual probability of death from colorectal cancer.

### Other cause Mortality (including diabetes risk)

Other cause mortality describes the risk of death from any cause except cardiovascular disease and cancer. All-cause mortality rates by age and sex were extracted from the Office of National Statistics (42). The mortality statistics report the number of deaths by ICD codes for 5-year age groups. We subtracted the number of cardiovascular disease, breast and colorectal cancer related deaths from the all-cause mortality total to estimate other cause mortality rates by age and sex (Table 33).

**Table 36: All cause and derived other cause mortality from the Office of National statistics**

|    | All cause | All cause | Other cause | Other cause |     | All cause | All cause | Other cause | Other cause |
|----|-----------|-----------|-------------|-------------|-----|-----------|-----------|-------------|-------------|
|    | Men       | Women     | Men         | Women       |     | Men       | Women     | Men         | Women       |
| 1  | 0.0004    | 0.0003    | 0.0003      | 0.0003      | 51  | 0.0034    | 0.0024    | 0.0025      | 0.0017      |
| 2  | 0.0002    | 0.0002    | 0.0002      | 0.0002      | 52  | 0.0039    | 0.0026    | 0.0029      | 0.0019      |
| 3  | 0.0001    | 0.0001    | 0.0001      | 0.0001      | 53  | 0.0044    | 0.0028    | 0.0032      | 0.0020      |
| 4  | 0.0001    | 0.0001    | 0.0001      | 0.0001      | 54  | 0.0045    | 0.0032    | 0.0034      | 0.0022      |
| 5  | 0.0001    | 0.0001    | 0.0001      | 0.0001      | 55  | 0.0051    | 0.0033    | 0.0037      | 0.0024      |
| 6  | 0.0001    | 0.0001    | 0.0001      | 0.0001      | 56  | 0.0057    | 0.0037    | 0.0041      | 0.0027      |
| 7  | 0.0001    | 0.0001    | 0.0001      | 0.0000      | 57  | 0.0061    | 0.0041    | 0.0044      | 0.0030      |
| 8  | 0.0001    | 0.0001    | 0.0001      | 0.0000      | 58  | 0.0069    | 0.0041    | 0.0050      | 0.0030      |
| 9  | 0.0001    | 0.0001    | 0.0001      | 0.0001      | 59  | 0.0071    | 0.0050    | 0.0052      | 0.0036      |
| 10 | 0.0001    | 0.0000    | 0.0001      | 0.0000      | 60  | 0.0081    | 0.0054    | 0.0059      | 0.0040      |
| 11 | 0.0001    | 0.0001    | 0.0001      | 0.0001      | 61  | 0.0086    | 0.0057    | 0.0063      | 0.0042      |
| 12 | 0.0001    | 0.0001    | 0.0001      | 0.0001      | 62  | 0.0096    | 0.0062    | 0.0070      | 0.0046      |
| 13 | 0.0001    | 0.0001    | 0.0001      | 0.0001      | 63  | 0.0104    | 0.0067    | 0.0076      | 0.0050      |
| 14 | 0.0001    | 0.0001    | 0.0001      | 0.0001      | 64  | 0.0108    | 0.0072    | 0.0079      | 0.0053      |
| 15 | 0.0002    | 0.0001    | 0.0002      | 0.0001      | 65  | 0.0125    | 0.0082    | 0.0091      | 0.0061      |
| 16 | 0.0002    | 0.0001    | 0.0002      | 0.0001      | 66  | 0.0141    | 0.0090    | 0.0103      | 0.0067      |
| 17 | 0.0003    | 0.0002    | 0.0003      | 0.0002      | 67  | 0.0148    | 0.0097    | 0.0108      | 0.0072      |
| 18 | 0.0004    | 0.0002    | 0.0004      | 0.0002      | 68  | 0.0162    | 0.0107    | 0.0118      | 0.0079      |
| 19 | 0.0004    | 0.0002    | 0.0004      | 0.0002      | 69  | 0.0181    | 0.0118    | 0.0132      | 0.0087      |
| 20 | 0.0005    | 0.0002    | 0.0005      | 0.0002      | 70  | 0.0218    | 0.0138    | 0.0157      | 0.0101      |
| 21 | 0.0005    | 0.0002    | 0.0005      | 0.0002      | 71  | 0.0234    | 0.0145    | 0.0168      | 0.0106      |
| 22 | 0.0005    | 0.0002    | 0.0005      | 0.0002      | 72  | 0.0252    | 0.0167    | 0.0182      | 0.0122      |
| 23 | 0.0005    | 0.0002    | 0.0005      | 0.0002      | 73  | 0.0269    | 0.0173    | 0.0193      | 0.0127      |
| 24 | 0.0005    | 0.0002    | 0.0005      | 0.0002      | 74  | 0.0310    | 0.0200    | 0.0223      | 0.0147      |
| 25 | 0.0006    | 0.0003    | 0.0006      | 0.0002      | 75  | 0.0327    | 0.0222    | 0.0233      | 0.0157      |
| 26 | 0.0006    | 0.0003    | 0.0005      | 0.0002      | 76  | 0.0375    | 0.0249    | 0.0267      | 0.0176      |
| 27 | 0.0006    | 0.0004    | 0.0005      | 0.0003      | 77  | 0.0411    | 0.0284    | 0.0293      | 0.0202      |
| 28 | 0.0007    | 0.0003    | 0.0006      | 0.0003      | 78  | 0.0458    | 0.0321    | 0.0326      | 0.0228      |
| 29 | 0.0007    | 0.0003    | 0.0006      | 0.0003      | 79  | 0.0523    | 0.0358    | 0.0372      | 0.0254      |
| 30 | 0.0007    | 0.0004    | 0.0006      | 0.0003      | 80  | 0.0585    | 0.0411    | 0.0418      | 0.0289      |
| 31 | 0.0008    | 0.0004    | 0.0007      | 0.0004      | 81  | 0.0652    | 0.0456    | 0.0465      | 0.0321      |
| 32 | 0.0007    | 0.0005    | 0.0007      | 0.0004      | 82  | 0.0745    | 0.0530    | 0.0531      | 0.0372      |
| 33 | 0.0008    | 0.0005    | 0.0007      | 0.0004      | 83  | 0.0833    | 0.0606    | 0.0594      | 0.0426      |
| 34 | 0.0009    | 0.0005    | 0.0008      | 0.0004      | 84  | 0.0931    | 0.0678    | 0.0664      | 0.0476      |
| 35 | 0.0010    | 0.0006    | 0.0008      | 0.0005      | 85  | 0.1040    | 0.0760    | 0.0738      | 0.0537      |
| 36 | 0.0011    | 0.0006    | 0.0010      | 0.0005      | 86  | 0.1147    | 0.0872    | 0.0814      | 0.0617      |
| 37 | 0.0013    | 0.0006    | 0.0011      | 0.0005      | 87  | 0.1300    | 0.0977    | 0.0923      | 0.0692      |
| 38 | 0.0013    | 0.0007    | 0.0011      | 0.0006      | 88  | 0.1468    | 0.1106    | 0.1042      | 0.0782      |
| 39 | 0.0013    | 0.0007    | 0.0011      | 0.0006      | 89  | 0.1643    | 0.1242    | 0.1166      | 0.0879      |
| 40 | 0.0015    | 0.0009    | 0.0012      | 0.0006      | 90  | 0.2285    | 0.1982    | 0.1660      | 0.1425      |
| 41 | 0.0016    | 0.0010    | 0.0013      | 0.0007      | 91  | 0.2285    | 0.1982    | 0.1660      | 0.1425      |
| 42 | 0.0018    | 0.0010    | 0.0015      | 0.0008      | 92  | 0.2285    | 0.1982    | 0.1660      | 0.1425      |
| 43 | 0.0018    | 0.0012    | 0.0015      | 0.0009      | 93  | 0.2285    | 0.1982    | 0.1660      | 0.1425      |
| 44 | 0.0020    | 0.0012    | 0.0017      | 0.0009      | 94  | 0.2285    | 0.1982    | 0.1660      | 0.1425      |
| 45 | 0.0022    | 0.0014    | 0.0017      | 0.0010      | 95  | 0.2285    | 0.1982    | 0.1751      | 0.1509      |
| 46 | 0.0023    | 0.0016    | 0.0018      | 0.0011      | 96  | 0.2285    | 0.1982    | 0.1751      | 0.1509      |
| 47 | 0.0023    | 0.0015    | 0.0018      | 0.0011      | 97  | 0.2285    | 0.1982    | 0.1751      | 0.1509      |
| 48 | 0.0027    | 0.0017    | 0.0021      | 0.0012      | 98  | 0.2285    | 0.1982    | 0.1751      | 0.1509      |
| 49 | 0.0028    | 0.0019    | 0.0022      | 0.0014      | 99  | 0.2285    | 0.1982    | 0.1751      | 0.1509      |
| 50 | 0.0030    | 0.0021    | 0.0023      | 0.0015      | 100 | 0.2285    | 0.1982    | 0.1751      | 0.1509      |

The rate of other cause mortality by age and sex was treated as the baseline hazard. Following input from stakeholders, an increased risk of mortality was assigned to individuals with diabetes using data



from a published meta-analysis (43). This study used data from 820,900 people from 97 prospective studies to calculate hazard ratios for cause-specific death, according to baseline diabetes status (43). Cause of death was separated into vascular disease, cancer and other cause mortality. From this study we estimated that individuals with a diagnosis of diabetes have a fixed increased risk of other cause mortality (Hazard ratio 1.8 (95% CI 1.71-1.9)). The estimates reported in the meta-analysis include increased risk of death from renal disease, therefore mortality from renal disease was not simulated separately to avoid double counting of benefits.

## **UTILITIES**

### **Baseline Utility**

Baseline utilities for all individuals in the cohort were extracted from the HSE 2011. The tariffs for the responses to the 3 level EQ-5D were derived from a UK population study (44). Baseline utility was assumed to decline due to ageing. In the simulation, utility declines by an absolute decrement of 0.004 per year. This estimate is based on previous HTA modelling in cardiovascular disease (21).

### **Utility Decrements**

The utility decrements for long term chronic conditions were applied to the age and BMI adjusted EQ-5D score. It was assumed that a diagnosis of diabetes was not associated with a reduction in EQ-5D independent of the utility decrements associated with complications, comorbidities or depression. Cardiovascular disease, renal failure, amputation, foot ulcers, blindness, cancer, osteoarthritis and depression were all assumed to result in utility decrements. The utility decrements are measured as a factor which is applied to the individual's age and BMI adjusted baseline. If individuals have multiple chronic conditions the utility decrements are multiplied together to give the individual's overall utility decrement from comorbidities and complications, in line with current NICE guidelines for combining comorbidities (45).

Due to the number of health states it was not practical to conduct a systematic review to identify utility decrements for all health states. A pragmatic approach was taken to search for health states within existing health technology assessments for the relevant disease area or by considering studies used in previous economic models for diabetes prevention. Discussions with experts in health economic modelling were also used to identify prominent sources of data for health state utilities.

Two sources of data were identified for diabetes related complications. A recent study from the UKPDS estimated the impact of changes in health states from a longitudinal cohort (46). They estimated the impact of myocardial infarction, ischaemic heart disease, stroke, heart failure, amputation and blindness on quality of life using seven rounds of EQ-5D questionnaires administered between 1997 and 2007. This data was used to estimate the utility decrement for amputation and

congestive heart failure. The absolute decrement for amputation was converted into utility decrement factors that could be multiplied by the individuals' current EQ-5D to estimate the relative effect of the complication.

Utility decrements for renal failure and foot ulcers were not available from the UKPDS study described above. A study by Coffey et al. (2000) was used to estimate utility decrements for renal failure and foot ulcers (47). In this study, 2,048 subjects with type 1 and type 2 diabetes were recruited from specialty clinics. The Self-Administered Quality of Well Being index (QWB-SA) was used to calculate a health utility score.

Utility decrements for cardiovascular events were taken from an HTA assessing statins to reflect the utility decrements in all patients (21) rather than using the UKPDS, which is only representative of a diabetic population. The study conducted a literature review to identify appropriate utility multipliers for stable angina, unstable angina, myocardial infarction and stroke. We used these estimates in the model and assume that transient ischaemic attack is not associated with a utility decrement in line with this HTA.

A systematic review of breast cancer utility studies was identified following consultation with colleagues with experience in this area. The review highlighted a single burden of illness study with a broad utility decrement for cancer (48), rather than utilities by cancer type or disease status. This study was most compatible with the structure of the cost-effectiveness structure. Within this study 1823 cancer survivors and 5469 age-, sex-, and educational attainment-matched control subjects completed EQ-5D questionnaires to estimate utility with and without cancer.

The utility decrement for osteoarthritis was taken from a Health Technology Assessment that assessed the clinical effectiveness and cost-effectiveness of glucosamine sulphate/hydrochloride and chondroitin sulphate in modifying the progression of osteoarthritis of the knee (49).

A review of cost-effectiveness studies highlights the scarcity of studies of health-related quality of life in depression (50). The utility studies identified in the review described depression states by severity and did not adjust for comorbid conditions. Furthermore, the valuations were variable between studies suggesting poor consistency in the estimations. Therefore, it was difficult to apply these in the model. We decided to use a study which had used the EQ-5D in an RCT, for consistency with our utility measure (51). They report an average post treatment utility of 0.67, from which we estimated the utility decrement compared with the average utility reported in the HSE dataset. The decrement was then converted into a relative utility reduction.

Table 37 reports the multiplicative utility factors that are used in the model to describe health utility decrements from comorbid complications. The mean absolute decrement estimated in each study is

reported alongside the baseline utility for each study. The utility factor was estimated by dividing the implied health utility with the comorbidity by the baseline utility.

**Table 37: Utility decrement factors**

|                                                   | Mean Absolute decrement | St. error absolute decrement | Baseline Utility | Multiplicative Utility Factor | Source         |
|---------------------------------------------------|-------------------------|------------------------------|------------------|-------------------------------|----------------|
| Foot ulcer                                        | -0.099                  | 0.013                        | 0.689            | 0.856                         | Coffey (47)    |
| Amputation                                        | -0.172                  | 0.045                        | 0.807            | 0.787                         | UKPDS (52)     |
| Blind                                             | 0.033                   | 0.027                        | 0.807            | 1.041                         | UKPDS (52)     |
| Renal failure                                     | -0.078                  | 0.026                        | 0.689            | 0.887                         | Coffey (47)    |
| Stable Angina                                     |                         |                              |                  | 0.801                         | Ward HTA (21)  |
| Unstable Angina y1                                |                         |                              |                  | 0.770                         | Ward HTA (21)  |
| Unstable Angina y2                                |                         |                              |                  | 0.770                         | Ward HTA (21)  |
| Myocardial Infarction y1                          |                         |                              |                  | 0.760                         | Ward HTA (21)  |
| Myocardial Infarction y2                          |                         |                              |                  | 0.760                         | Ward HTA (21)  |
| Transient Ischaemic Attack                        |                         |                              |                  | 1.000                         | Ward HTA (21)  |
| Stroke y1                                         |                         |                              |                  | 0.629                         | Ward HTA (21)  |
| Stroke y2                                         |                         |                              |                  | 0.629                         | Ward HTA (21)  |
| Breast Cancer                                     | -0.060                  |                              | 0.800            | 0.913                         | Yabroff (48)   |
| Colorectal Cancer                                 | -0.060                  |                              | 0.800            | 0.913                         | Yabroff (48)   |
| Osteoarthritis                                    | -0.101                  |                              |                  |                               | Black HTA (49) |
| Depression                                        | -0.116                  |                              | 0.7905           | 0.875                         | Benedict (51)  |
| Congestive Heart Failure                          | -0.101                  | 0.032                        |                  | 0.875                         | UKPDS (52)     |
| UKPDS baseline utility 0.807; HSE baseline 0.7905 |                         |                              |                  |                               |                |

## COSTS

At any given time period of the model individuals can have multiple health complications that incur direct healthcare costs. Some of the health states are mutually exclusive; however an individual can accrue multiple complications within the model. Each health state is associated with an average cost, which is accrued by all individuals for every time period for which the state is indicated. Resource use for each comorbidity is added together and no savings are assumed to be made from the use of the same resources for two or more comorbidities for an individual. An exception to this is an assumed adjustment to the utilisation of GP services for individuals with chronic diseases. In the majority of cases it is assumed that the unit costs of healthcare for someone with ID would be the same as the unit costs for an individual in the general population. The exception was cost for a GP appointment, which was expected to be 40% higher than in the general population due to increased length of consultation. All costs were inflated to 2014/15 values using the retail price index where necessary, from the Personal Social Services Research Unit (PSSRU) sources of information (53). Table 38 shows a summary of all the unit costs used in the model and their sources.

**Table 38: Summary of all drug, treatment, care and resource costs included in the model**

|                                                                      | <b>Drug, Treatment, Care and Resource Costs of</b>                                                                                      | Cost per year/<br>incident in<br>2014/15<br>prices<br>(* 2006<br>prices) | Source     |
|----------------------------------------------------------------------|-----------------------------------------------------------------------------------------------------------------------------------------|--------------------------------------------------------------------------|------------|
| <b>Screening and Intervention costs</b>                              |                                                                                                                                         |                                                                          |            |
|                                                                      | Intervention per person                                                                                                                 | £270                                                                     | PHE        |
| <b>First line diabetes treatment - low cost diabetes monotherapy</b> |                                                                                                                                         |                                                                          |            |
|                                                                      | <b>Ongoing costs of diabetes monotherapy – made up of...</b>                                                                            | <b>£79.06</b>                                                            |            |
|                                                                      | Metformin 500 mg <i>bid</i> standard (85% of patients) or modified release (15%) tablets                                                | £18.83                                                                   | BNF (54)   |
|                                                                      | Nurse at GP (consultation)                                                                                                              | £25.52                                                                   | PSSRU (53) |
|                                                                      | Health care assistant (10 mins)                                                                                                         | £3.40                                                                    | PSSRU (53) |
|                                                                      | Urine sample                                                                                                                            | £1.00                                                                    | (55)       |
|                                                                      | Eye screening                                                                                                                           | £24.31                                                                   | (56)       |
|                                                                      | Lab tests – made up of...                                                                                                               | £6.00                                                                    |            |
|                                                                      | <i>HbA1c test</i>                                                                                                                       | £3.00                                                                    | (55)       |
|                                                                      | <i>Lipids test</i>                                                                                                                      | £1.00                                                                    | (55)       |
|                                                                      | <i>Liver function test</i>                                                                                                              | £1.00                                                                    | (55)       |
|                                                                      | <i>B12 test</i>                                                                                                                         | £1.00                                                                    | (55)       |
|                                                                      | <b>Additional first year costs of diabetes monotherapy – made up of...</b>                                                              | <b>£103</b>                                                              |            |
|                                                                      | Nurse at GP (2 x consultations)                                                                                                         | £51.03                                                                   | PSSRU (53) |
|                                                                      | Health care assistant (2 x 10 mins)                                                                                                     | £6.80                                                                    | PSSRU (53) |
|                                                                      | Urine sample (x2)                                                                                                                       | £2.00                                                                    | (55)       |
|                                                                      | Lab tests as above (x2)                                                                                                                 | £12.00                                                                   | (55)       |
|                                                                      | Smoking cessation (central estimate of cost of nicotine replacement therapy) taken up by 50% of the assumed 20% of population who smoke | £30.90                                                                   | PSSRU (53) |
|                                                                      | <b>Second line diabetes treatment - Metformin and Gliptins– made up of...</b>                                                           | <b>£529</b>                                                              |            |
|                                                                      | Sitagliptin 100 mg daily                                                                                                                | £434                                                                     | BNF (54)   |
|                                                                      | Metformin 500 mg <i>bid</i> standard (85% of patients) or modified release (15%) tablets                                                | £85                                                                      | BNF (54)   |
|                                                                      | Self-monitoring strips (82 per annum) (57)                                                                                              | £16.36                                                                   | BNF (54)   |
|                                                                      | Nurse at GP (consultation)                                                                                                              | £25.52                                                                   | (53)       |
|                                                                      | Health care assistant (10 mins)                                                                                                         | £3.40                                                                    | (53)       |
|                                                                      | Urine sample                                                                                                                            | £1.00                                                                    | (55)       |
|                                                                      | Eye screening                                                                                                                           | £24.31                                                                   | (56)       |
|                                                                      | Lab tests as for first line treatment                                                                                                   | £6.00                                                                    | (55)       |
|                                                                      | <b>Third line diabetes treatment - Insulin and oral anti-diabetics – made up of...</b>                                                  | <b>£1,503</b>                                                            |            |
|                                                                      | Nurse at GP (3 x consultations)                                                                                                         | £76.55                                                                   | PSSRU (53) |
|                                                                      | Health care assistant (3 x 10 mins)                                                                                                     | £10.21                                                                   | PSSRU (53) |
|                                                                      | Urine sample (x3)                                                                                                                       | £3.00                                                                    | (55)       |
|                                                                      | Eye screening                                                                                                                           | £24.31                                                                   | (56)       |
|                                                                      | Lab tests as for first line treatment (x3)                                                                                              | £18.00                                                                   | (55)       |
|                                                                      | Insulin treatment costs – made up of...                                                                                                 | £1,376                                                                   |            |
|                                                                      | <i>Glargine</i>                                                                                                                         | £830.83                                                                  | (58)       |
|                                                                      | <i>Oral anti-diabetics</i>                                                                                                              | £57.75                                                                   | (58)       |
|                                                                      | <i>Reagent test strips</i>                                                                                                              | £292.74                                                                  | (58)       |
|                                                                      | <i>Hypoglycaemic rescue</i>                                                                                                             | £30.98                                                                   | (58)       |
|                                                                      | <i>Pen delivery devices</i>                                                                                                             | £72.44                                                                   | (58)       |
|                                                                      | <i>Sharps</i>                                                                                                                           | £90.98                                                                   | (58)       |

|                                              |                                                                                                                                                                                                                   |         |            |
|----------------------------------------------|-------------------------------------------------------------------------------------------------------------------------------------------------------------------------------------------------------------------|---------|------------|
| <b>Other primary care costs</b>              |                                                                                                                                                                                                                   |         |            |
|                                              | GP visit (17 minutes)                                                                                                                                                                                             | £46.95  | PSSRU (53) |
|                                              | Diagnosis of hypertension (including ambulatory blood pressure monitoring)                                                                                                                                        | £56.51  | (19)       |
|                                              | Annual treatment with statins (simvastatin 20 mg <i>bid</i> )                                                                                                                                                     | £26.59  | BNF (54)   |
|                                              | Annual treatment with anti-hypertensives                                                                                                                                                                          | £195.94 | (59)       |
| <b>Cardiovascular disease costs</b>          |                                                                                                                                                                                                                   |         |            |
|                                              | Unstable Angina year 1:<br><i>Secondary care costs: 100% hospitalisation, 50% revascularisation procedure, three outpatient appointments.</i><br><i>Primary care costs (three GP visits) and medications</i>      | £4,674  | (20)       |
|                                              | Myocardial infarction year 1<br><i>Secondary care costs: 100% hospitalisation, 50% revascularisation procedure, three outpatient appointments</i><br><i>Primary care costs (three GP visits) and medications.</i> | £4,813  | (20)       |
|                                              | Subsequent ACS care costs<br><i>Secondary care costs (one outpatient appointment).</i><br><i>Primary care costs (three GP visits) and medications.</i>                                                            | £410    | (20)       |
|                                              | Stroke year 1 (NHS costs)<br><i>Costs of acute events reported in Youman et al. (60) weighted by the distribution of severity of stroke (21).</i>                                                                 | £9,716  | (60)       |
|                                              | Social care costs of stroke in subsequent years<br><i>The costs of ongoing care at home or in an institution weighted by the distribution of severity of stroke and discharge locations.</i>                      | £2,730  | (20)       |
|                                              | Fatal coronary heart disease<br><i>Assumed that 50% of fatalities incurred cost.</i>                                                                                                                              | £713    | (61)       |
|                                              | Fatal non cardiac vascular event<br><i>Assumed that 50% of fatalities incurred cost.</i>                                                                                                                          | £4,443  | (60)       |
|                                              | Congestive heart failure                                                                                                                                                                                          | £3,091  | UKPDS (62) |
| <b>Other complications of diabetes costs</b> |                                                                                                                                                                                                                   |         |            |
|                                              | Renal failure – weighted composite of...                                                                                                                                                                          | £25,046 |            |
|                                              | <i>Haemodialysis with overheads</i>                                                                                                                                                                               | £42,049 | (63)       |
|                                              | <i>Automated peritoneal dialysis</i>                                                                                                                                                                              | £27,217 | (63)       |
|                                              | <i>Continuous ambulatory peritoneal dialysis</i>                                                                                                                                                                  | £19,742 | (63)       |
|                                              | <i>Transplant (year 1)</i>                                                                                                                                                                                        | £23,660 | (64)       |
|                                              | <i>Immunosuppressant (10 years)</i>                                                                                                                                                                               | £6,959  | (64)       |
|                                              | Foot ulcers                                                                                                                                                                                                       | £216    | (65)       |
|                                              | Amputation first year                                                                                                                                                                                             | £10,101 | UKPDS (66) |
|                                              | Amputation subsequent years                                                                                                                                                                                       | £1,896  | UKPDS (66) |
|                                              | Blindness first year                                                                                                                                                                                              | £1,434  | UKPDS (66) |
|                                              | Blindness subsequent years                                                                                                                                                                                        | £479    | UKPDS (66) |
|                                              | Breast cancer                                                                                                                                                                                                     | £13,818 | (67)       |
|                                              | Colorectal cancer                                                                                                                                                                                                 | £18,729 | (68)       |
|                                              | Osteoarthritis                                                                                                                                                                                                    | £962    | (69)       |
|                                              | Depression - made up of...                                                                                                                                                                                        | £137    | (70)       |
|                                              | <i>Practice nurse at surgery</i>                                                                                                                                                                                  | £13.70  |            |
|                                              | <i>Practice nurse at home visit</i>                                                                                                                                                                               | £0.54   |            |
|                                              | <i>Practice nurse telephone</i>                                                                                                                                                                                   | £0.99   |            |
|                                              | <i>Health visitor</i>                                                                                                                                                                                             | £1.94   |            |
|                                              | <i>District nurse</i>                                                                                                                                                                                             | £0.38   |            |
|                                              | <i>Other nurse</i>                                                                                                                                                                                                | £1.17   |            |
|                                              | <i>HCA phlebotomist</i>                                                                                                                                                                                           | £1.05   |            |

|                                                                                                                                                                                                                                                                                                      |  |                               |              |  |
|------------------------------------------------------------------------------------------------------------------------------------------------------------------------------------------------------------------------------------------------------------------------------------------------------|--|-------------------------------|--------------|--|
|                                                                                                                                                                                                                                                                                                      |  | <i>Other primary care</i>     | <i>£4.85</i> |  |
|                                                                                                                                                                                                                                                                                                      |  | <i>Out of hours</i>           | <i>£6.18</i> |  |
|                                                                                                                                                                                                                                                                                                      |  | <i>NHS direct</i>             | <i>£2.28</i> |  |
|                                                                                                                                                                                                                                                                                                      |  | <i>Walk-in centre</i>         | <i>£8.15</i> |  |
|                                                                                                                                                                                                                                                                                                      |  | <i>Prescribed medications</i> | <i>£74</i>   |  |
|                                                                                                                                                                                                                                                                                                      |  | <i>Secondary care</i>         | <i>£21</i>   |  |
| Assumed 20% smoking prevalence and 50% uptake of smoking cessation services<br>SANG Stable angina; UANG unstable angina; MI myocardial infarction; TIA transient ischemic attack; CHD congestive heart failure; ACS acute Coronary Syndrome; UKPDS United Kingdom prospective Diabetes Study. Assume |  |                               |              |  |

### **Opportunistic screening**

Recent guidelines for hypertension have recommended that hypertension be confirmed with ambulatory blood pressure monitoring (ABPM) (18). The cost of ABPM assessment is included in the cost of diagnosis (£53.40) (19), however, we assume that the test does not alter the initial diagnosis.

A cost of diabetes diagnosis is included in the model based on the cost of an HbA1c test.

The cost of screening for high cardiovascular risk was not included as a cost associated with initiation with statins because most GP practices in the UK routinely commission and use cardiovascular risk scores that are easy to access within a normal consultation.

### **Diabetes**

A three stage diabetes treatment regimen is applied in the model as a trade-off between model simplicity and capturing key cost differences between the interventions. At diagnosis all patients are prescribed low cost treatments, represented by Metformin (weighted average of standard and modified release) to describe the average cost of these medications. If HbA1c increases above 7.4% the individual is prescribed the more expensive Gliptins in addition to Metformin, based on a recent HTA (71). For costing purposes the second drug to be added to Metformin was assumed to be Sitagliptin. The individual continues to receive Metformin plus Gliptins for a period of time until they require insulin. Within the model the individual is switched to insulin in the first annual cycle at which HbA1c exceeds 8.5% (71). The insulin Glargine was chosen to represent insulin treatment in the UK. The cost of diabetes in the year of diagnosis is assumed to be greater than subsequent years because the individual will receive more contact time whilst their diabetes is being controlled.

### **Other Primary Care Costs**

Individuals who are prescribed statins receive a daily dose of 40mg of generic Simvastatin. The individual remains on statins for the rest of their life. A unit cost of anti-hypertensives was obtained from a 2004 study (59) and inflated to 2014/15 prices. Due to the number of different anti-hypertensive treatments available and possibilities for combination therapies, using the cost from this study of prescriptions was preferred to using costs directly from the BNF. The stakeholder group

advised that attendance at visits to monitor cardiovascular risk on statins and anti-hypertensives are not perfect. Therefore, the costs of GP attendance to monitor blood pressure and cardiovascular risk are assumed to be accounted for within the model for GP attendance.

### **Cardiovascular costs**

Costs for cardiovascular disease were obtained from a 2009 HTA for high dose lipid-lowering therapy (20). Table 38 shows the details of included costs. The costs of fatal stroke and MI were obtained from two separate studies (60;61), and it was assumed that 50% of individuals would incur these costs. The costs of congestive heart failure were estimated from the UKPDS costing study for complications related to diabetes (62).

### **Microvascular costs**

The cost of renal failure was estimated from three studies reporting the costs of dialysis type (63), the costs of transplantation (64) and the prevalence of dialysis and transplant (72). The overall cost was estimated as a weighted average of the treatment outcomes.

The cost of foot ulcers was estimated from a US Cost of Illness study (65). A search of the literature did not identify any UK based studies. The costs were converted from dollars to pounds using Purchasing Power Parities reported by the OECD (73).

The costs of amputation and blindness in the first year of surgery and in subsequent years were reported in a recent UKPDS costing study (66).

### **Costs of Other Comorbidities**

Disease progression for breast cancer and colorectal cancer was not included in the model. Therefore, a lifetime cost of cancer care was imposed at diagnosis in the model. Costs for breast and colon cancer were taken from two screening appraisals (67;68). Breast cancer costs were estimated as a weighted average depending on the prognosis at diagnosis, whereas colon cancer costs were estimated as a weighted average depending on the Dukes tumour stage.

The annual cost of osteoarthritis was estimated in a costing study (69). In this report the authors estimated the expected cost of osteoarthritis from three previous costing studies. The costs include GP attendance, nurse consultations, replacement surgery, help at home and prescription medications.

A recent trial to prevent secondary depressive episodes collected comprehensive cost data from a sample of individuals with depression (70). The resource uses identified in the control arm were extracted to estimate the costs of depression. The costs from this data were not implemented directly into the model; this would have over-estimated the number of GP visits as the model already accounts for GP attendance due to depression. Therefore, a revised estimate of the cost of depression,

excluding GP consultation was estimated using updated unit costs. Given that this cost captures the costs of depression following the first acute episode we assumed that this cost adequately described the ongoing healthcare costs for individuals with a history of depression. It is possible that this will overestimate costs for patients who successfully remit and avoid future depression. However, there is evidence from the literature to suggest that individuals with a history of depression have a high utilisation of healthcare resources to support this assumption (74).

## **INTERVENTION**

The subgroup analysis estimates the per person cost savings and health outcomes of delivering the DPP lifestyle intervention in the 22 chosen subgroups. Interventions will be commissioned from a handful of national providers and will include a mixture of dietary educational advice and physical activity, with the aim of reducing both weight and diabetes risk.

The SPHR Diabetes Prevention Model does not explicitly model changes in diet or physical activity. Instead interventions are assumed to impact directly upon individual risk factors such as BMI, blood pressure, cholesterol and HbA1c. In the model these changes then impact upon incidence rates of type 2 diabetes and related diseases. This section of the technical appendix describes the assumptions around the intervention that are used as default settings in the model.

### **Intervention Uptake**

In practice, of the IGR individuals identified through HbA1c testing, only a proportion will receive the intervention. Some individuals may not be referred for intervention. Of those referred, some will choose not to take up the intervention, and of those that do attend the first intervention session, some will not complete the intervention (Figure 2).

Referral rates are not directly modelled, and instead it is assumed that all individuals are identified and referred for intervention prior to the model start. This is partly because of lack of data around referral rates and partly because referral rates are a function of the number of available intervention places.

Intervention uptake is defined as the proportion of those referred to the intervention who decide to take up the intervention. The original aim of the analysis was to include data around differential uptake of interventions in different population subgroups. However, good quality data could not be identified and instead a uniform uptake rate of 32% has been used. It is assumed that those who decided not to take up the intervention incur no costs and no benefits of intervention. No costs of identifying or referring individuals to intervention are modelled. In practice, some individuals who start the intervention will not complete it and therefore not gain full benefit. However, non-



completion is partially accounted for in the estimate of effectiveness used in the model (74), so has not been explicitly built in. This is discussed further below.

**Figure 2: Schematic showing intervention uptake and completion in practice and in the model**

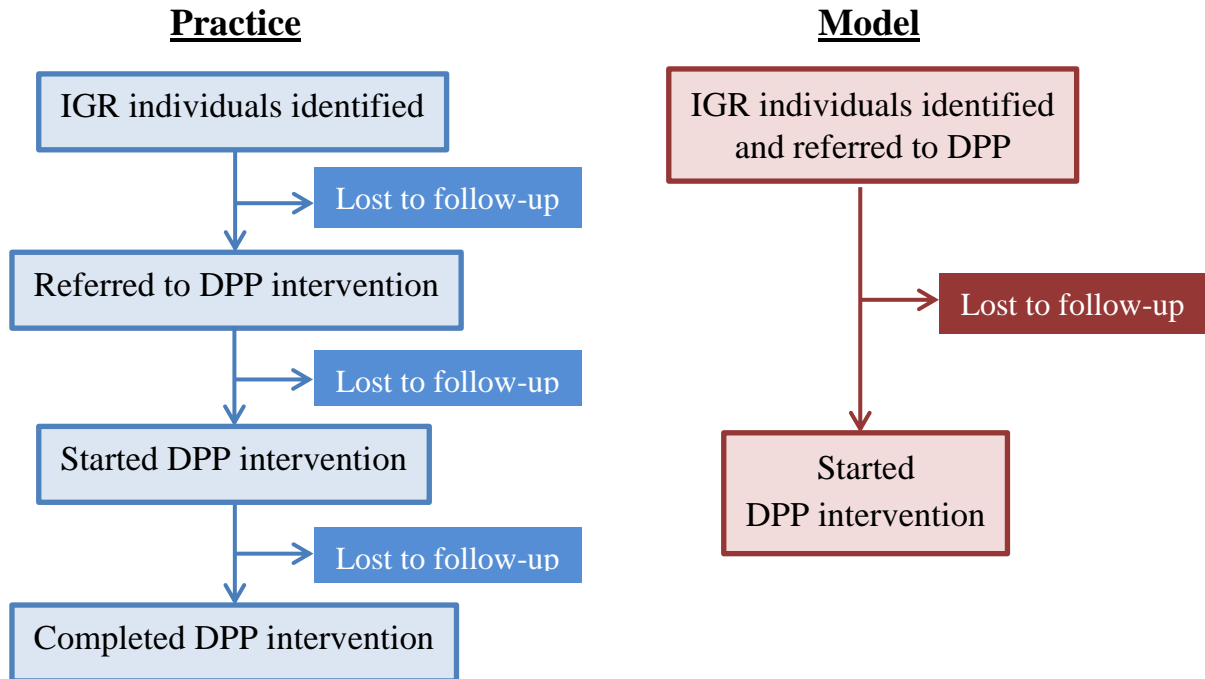

### **Intervention Effectiveness**

The effectiveness data used in the model comes from a PHE evidence review of pragmatic lifestyle interventions for prevention of type 2 diabetes (75). This updates a previous review by Dunkley and others (76). Both reviews incorporate meta-analyses of a wide range of different lifestyle interventions aimed at reducing type-2 diabetes, and report a variety of outcomes including type-2 diabetes incidence rate and weight loss. The PHE evidence review also includes some analysis of differential effectiveness in population subgroups and for different intervention characteristics.

PHE, NHS England and Diabetes UK have specified that they wish the commissioned DPP intervention to fulfil 9-12 NICE guidelines as recommended in PH38 (3). NICE guidelines include using particular strategies that are associated with increased effectiveness, specifying the minimum amount of contact time and follow-up sessions, and delivering the programme through qualified practitioners. Both the PHE evidence review and the Dunkley meta-analysis indicate that interventions have increased effectiveness if they fulfil a greater number of NICE guidelines (75;76). In line with this, the model uses the results from the subgroup analysis of interventions fulfilling 9-12 NICE guidelines as the mean effectiveness (weight loss of 3.24kg – Table 12 in the PHE Evidence Review (75)).

Unlike the Dunkley meta-analysis, the PHE evidence review does not report differences in HbA1c, systolic blood pressure (SBP) or cholesterol for this subgroup of interventions. However, it is clear from the Dunkley analysis that there will be concurrent reductions in these other metabolic factors, and that the effectiveness of the intervention would be underestimated in the model if they were not included. To incorporate these changes, the differences in HbA1c, SBP and cholesterol were extrapolated from the Dunkley analysis to reflect the updated weight loss used from the PHE evidence review. This assumes that relationships between changes in metabolic factors are linear. The intervention effectiveness for each metabolic factor used in the model is reported in Table 39.

**Table 39: Mean intervention effectiveness used in the model**

|                                | Mean values from Dunkley et al supplementary Table 7 (76) | Used in the DPP analysis: Default Mean weight loss from Table 12 of PHE evidence review for 9-12 NICE guidelines (75) | Used in the DPP analysis: Sensitivity analysis - 25% Lower |
|--------------------------------|-----------------------------------------------------------|-----------------------------------------------------------------------------------------------------------------------|------------------------------------------------------------|
| Weight (kg)                    | -2.12                                                     | -3.24                                                                                                                 | -2.43                                                      |
| BMI (kg/m <sup>2</sup> )       | -0.96                                                     | -1.47                                                                                                                 | -1.10                                                      |
| HbA1c (%)                      | -0.13                                                     | -0.20                                                                                                                 | -0.15                                                      |
| Systolic Blood Pressure (mmHg) | -4.3                                                      | -6.57                                                                                                                 | -4.93                                                      |
| Total Cholesterol (mmol/l)     | -0.18                                                     | -0.28                                                                                                                 | -0.21                                                      |

There is good evidence from the PHE evidence review and other studies that intervention effectiveness is unlikely to be uniform across the population, and in particular varies according to the baseline BMI of individuals, those with higher baseline BMI reporting increased weight loss and diabetes risk reduction than those with lower baseline BMI (75;77-79). A differential intervention effect by baseline BMI was therefore implemented in the model. Again this was taken from the PHE evidence review as shown in Table 40 (75).

**Table 40: Weight change results per unit baseline BMI from the PHE Evidence Review (75)**

| Subgroup | Weight change            | Unit                                | Study Median           |
|----------|--------------------------|-------------------------------------|------------------------|
| BMI      | -0.23 kg (-0.53 to 0.07) | Per unit increase in mean study BMI | 31.5 kg/m <sup>2</sup> |

Personalised intervention effects for each individual, dependent upon their baseline BMI were calculated using the following equation:

**Personalised Intervention Effect = Mean Intervention Effect**

$$+ \text{BMI Effect} * (\text{Individual BMI} - \text{Median BMI})$$

|        |                                                                                                                    |
|--------|--------------------------------------------------------------------------------------------------------------------|
| Where: | Mean Intervention Effect = -3.24 kg                                                                                |
|        | BMI Effect = -0.23 kg                                                                                              |
|        | Individual BMI = the baseline BMI of each individual in the population                                             |
|        | Median BMI = 31.5 kg/m <sup>2</sup> (the median of the mean BMI from each study included in the PHE meta-analysis) |

For example, for an individual with baseline BMI of 30, the personalised intervention effect would correspond to a weight loss of 2.895kg (smaller than the mean intervention effect), whereas for an individual with baseline BMI of 35, the personalised intervention effect would correspond to a weight loss of 4.045kg (larger than the mean intervention effect). Note that in individuals with BMI < 17.5, the effect of the intervention would be to actually increase weight. However, there are very few such IGR individuals in the model and an intervention focussing on weight loss may not in any case be the best option for individuals who are already underweight.

From this personalised change in weight due to the intervention, individualised changes in BMI, HbA1c, SBP and cholesterol were derived. Individuals in the intervention arm of the model who take up the intervention were assumed to receive this reduction in their metabolic factors instantaneously at the start of the model.

In practice, some individuals who start the intervention will not complete it. The PHE evidence review contains a mixture of studies that have used either intention to treat or complete case analysis (75). Intention to treat analysis takes non-completion into account, whereas complete case analysis does not. However, it is unclear which studies have been used to derive the estimate of effectiveness for 9-12 NICE guidelines. It is likely therefore that the effectiveness estimate used in the model only partially accounts for non-completion and therefore may be higher than is realistic in practice.

The Whitehall II BMI trajectory model estimates an indirect relationship between BMI change and changes in metabolic risk factors. The changes to HbA1c, systolic blood pressure and cholesterol were adjusted to avoid double counting of the indirect effects through BMI and direct effects of the intervention.

**Intervention Costs**

The actual intervention cost of the DPP will be determined through the DPP procurement process in early 2016. As this was still undergoing at the time of this analysis, PHE suggested that the mid average cost from their impact assessment of £270 per participant should be used as the default cost. This incorporates expected retention rates of participants, but does not include any local costs of identifying or referring individuals for intervention.

## Duration of Intervention Effect

There is very little published information about how long the effectiveness of intensive lifestyle interventions is likely to endure in participants before weight is regained. In the model, default intervention effectiveness is assumed to decline linearly from its peak at the start of the model until individuals reach the BMI/SBP/HbA1c/cholesterol level that they would have been without intervention. It has been assumed for the analysis that this process takes five years.

## MODEL PARAMETERS

All parameters used in the model, their distributions for PSA and their sources are documented here.

### GP Attendance in the General Population

GP attendance is estimated from statistical analysis of the Yorkshire Health Study (11). In the PSA, the parameters are sampled from a multivariate normal distribution, using the mean estimates described in Table 41 and covariance matrix in Table 42.

**Table 41: GP attendance reported in the Yorkshire Health Study (N= 18,437) <sup>(11)</sup>**

|                       | Mean    | Standard error | Uncertainty Distribution |
|-----------------------|---------|----------------|--------------------------|
| Age                   | 0.0076  | 0.0005         | MULTIVARIATE NORMAL      |
| Male                  | -0.1495 | 0.0159         | MULTIVARIATE NORMAL      |
| BMI                   | 0.0110  | 0.0015         | MULTIVARIATE NORMAL      |
| Ethnicity (Non-white) | 0.2620  | 0.0375         | MULTIVARIATE NORMAL      |
| Heart Disease         | 0.2533  | 0.0289         | MULTIVARIATE NORMAL      |
| Depression            | 0.6127  | 0.0224         | MULTIVARIATE NORMAL      |
| Osteoarthritis        | 0.2641  | 0.0238         | MULTIVARIATE NORMAL      |
| Diabetes              | 0.2702  | 0.0278         | MULTIVARIATE NORMAL      |
| Stroke                | 0.1659  | 0.0474         | MULTIVARIATE NORMAL      |
| Cancer                | 0.2672  | 0.0414         | MULTIVARIATE NORMAL      |
| Intercept             | -0.5014 | 0.0468         | MULTIVARIATE NORMAL      |
| Alpha                 | 0.3423  | 0.0108         | MULTIVARIATE NORMAL      |

**Table 42: Variance-covariance matrix for GP attendance regression**

|                       | Age    | Male   | BMI    | Ethnicity (Non-white) | Heart Disease | Depression | Osteoarthritis | Diabetes | Stroke  | Cancer | Intercept | Alpha |
|-----------------------|--------|--------|--------|-----------------------|---------------|------------|----------------|----------|---------|--------|-----------|-------|
| Age                   | 0.0000 |        |        |                       |               |            |                |          |         |        |           |       |
| Male                  | 0.0000 | 0.0003 |        |                       |               |            |                |          |         |        |           |       |
| BMI                   | 0.0000 | 0.0000 | 0.0000 |                       |               |            |                |          |         |        |           |       |
| Ethnicity (Non-white) | 0.0000 | 0.0000 | 0.0000 | 0.0014                |               |            |                |          |         |        |           |       |
| Heart Disease         | 0.0000 | 0.0000 | 0.0000 | 0.0000                | 0.0008        |            |                |          |         |        |           |       |
| Depression            | 0.0000 | 0.0000 | 0.0000 | 0.0000                | 0.0000        | 0.0005     |                |          |         |        |           |       |
| Osteoarthritis        | 0.0000 | 0.0000 | 0.0000 | 0.0000                | 0.0000        | 0.0000     | 0.0006         |          |         |        |           |       |
| Diabetes              | 0.0000 | 0.0000 | 0.0000 | 0.0000                | -0.0001       | 0.0000     | 0.0000         | 0.0008   |         |        |           |       |
| Stroke                | 0.0000 | 0.0000 | 0.0000 | 0.0000                | -0.0002       | -0.0001    | 0.0000         | -0.0001  | 0.0022  |        |           |       |
| Cancer                | 0.0000 | 0.0000 | 0.0000 | 0.0000                | 0.0000        | 0.0000     | 0.0000         | 0.0000   | -0.0001 | 0.0017 |           |       |

|           |        |        |         |         |        |        |        |        |        |        |        |        |
|-----------|--------|--------|---------|---------|--------|--------|--------|--------|--------|--------|--------|--------|
| Intercept | 0.0000 | 0.0000 | -0.0001 | -0.0002 | 0.0002 | 0.0000 | 0.0002 | 0.0003 | 0.0000 | 0.0001 | 0.0022 |        |
| Alpha     | 0.0000 | 0.0000 | 0.0000  | 0.0000  | 0.0000 | 0.0000 | 0.0000 | 0.0000 | 0.0000 | 0.0000 | 0.0000 | 0.0010 |

## Whitehall II Statistical Model of Metabolic Trajectories

The metabolic trajectories used in the model are derived from statistical analysis of the longitudinal Whitehall II cohort (13). The parameters derived from this model are described in the following tables.

**Table 43: Coefficient estimates for metabolic risk factor parallel growth models**

|                             | Parameter Description                                       | Estimated Mean | Standard error | p-value |
|-----------------------------|-------------------------------------------------------------|----------------|----------------|---------|
| <b>BMI Intercept</b>        |                                                             |                |                |         |
| $\alpha_{10}$               | Population mean BMI intercept                               | 2.2521         | 0.045          | <0.001  |
| $\gamma_{10}$               | Age at baseline coefficient for BMI intercept               | 0.0056         | 0.001          | <0.001  |
|                             | Sex coefficient for BMI intercept                           | -0.0311        | 0.012          | 0.009   |
|                             | Family history of CVD coefficient for BMI intercept         | -0.0079        | 0.012          | 0.515   |
| $\nu_{10}$                  | Random error term for BMI intercept                         | 0.1165         | 0.003          | <0.001  |
| <b>BMI linear slope</b>     |                                                             |                |                |         |
| $\alpha_{11}$               | Population mean BMI linear slope                            | 0.6409         | 0.042          | <0.001  |
| $\gamma_{11}$               | Age at baseline coefficient for BMI linear slope            | -0.0084        | 0.001          | <0.001  |
|                             | Sex coefficient for BMI linear slope                        | -0.0285        | 0.011          | 0.009   |
|                             | Family history of CVD coefficient for BMI linear slope      | -0.0155        | 0.010          | 0.117   |
| $\nu_{11}$                  | Random error term for BMI linear slope                      | 0.0222         | <0.001         | <0.001  |
| <b>BMI quadratic slope</b>  |                                                             |                |                |         |
| $\alpha_{12}$               | Population mean BMI quadratic slope                         | -0.2007        | 0.023          | <0.001  |
| $\gamma_{12}$               | Age at baseline coefficient for quadratic slope             | 0.0026         | <0.001         | <0.001  |
|                             | Sex coefficient for quadratic slope                         | 0.0089         | 0.006          | 0.147   |
|                             | Family history of CVD coefficient for quadratic slope       | 0.0104         | 0.006          | 0.061   |
| $\epsilon_1$                | Random error term for BMI                                   | 0.0104         | <0.001         | <0.001  |
| <b>Glyc Intercept</b>       |                                                             |                |                |         |
| $\alpha_{20}$               | Population mean glyc intercept                              | 0              | NA             | NA      |
| $\gamma_{20}$               | Smoker coefficient for glyc intercept                       | -0.1388        | 0.029          | <0.001  |
| $\tau_{20}$                 | Association between BMI intercept and glyc intercept        | 0.2620         | 0.024          | <0.001  |
| $\nu_{20}$                  | Random error term for glyc intercept                        | 0.0851         | 0.008          | <0.001  |
| <b>Glyc linear slope</b>    |                                                             |                |                |         |
| $\alpha_{21}$               | Population mean glyc linear slope                           | -0.4255        | 0.071          | <0.001  |
| $\gamma_{21}$               | Sex coefficient for glyc linear slope                       | 0.1486         | 0.045          | 0.001   |
|                             | Ethnicity coefficient for glyc linear slope                 | -0.0218        | 0.081          | 0.786   |
|                             | Family history of T2DM coefficient for glyc linear slope    | -0.0512        | 0.054          | 0.345   |
|                             | Smoker coefficient for glyc linear slope                    | 0.1796         | 0.066          | 0.007   |
| $\tau_{21}$                 | Association between BMI intercept and glyc linear slope     | 0.0821         | 0.024          | 0.001   |
| $\tau_{22}$                 | Association between BMI linear slope and glyc linear slope  | 0.1984         | 0.073          | 0.007   |
| $\nu_{21}$                  | Random error term for glyc linear slope                     | 0.0222         | 0.011          | 0.053   |
| <b>Glyc quadratic slope</b> |                                                             |                |                |         |
| $\alpha_{22}$               | Population mean glyc quadratic slope                        | 0.1094         | 0.025          | <0.001  |
| $\gamma_{22}$               | Sex coefficient for glyc quadratic slope                    | -0.0855        | 0.027          | 0.002   |
|                             | Ethnicity coefficient for glyc quadratic slope              | 0.0899         | 0.049          | 0.067   |
|                             | Family history of T2DM coefficient for glyc quadratic slope | 0.0633         | 0.033          | 0.052   |
|                             | Smoker coefficient for glyc quadratic slope                 | -0.0390        | 0.040          | 0.330   |
| $\nu_{22}$                  | Random error term for glyc quadratic slope                  | 0.0107         | 0.003          | 0.002   |
| $\epsilon_2$                | Glyc measurement error                                      | 0.0707         | 0.005          | <0.001  |
| <b>SBP Intercept</b>        |                                                             |                |                |         |
| $\alpha_{30}$               | Population mean SBP intercept                               | 0.6934         | 0.021          | <0.001  |
| $\gamma_{30}$               | Age at baseline coefficient for SBP intercept               | 0.0043         | <0.001         | <0.001  |

|                  |                                                           |         |        |        |
|------------------|-----------------------------------------------------------|---------|--------|--------|
|                  | Sex coefficient for SBP intercept                         | 0.0380  | 0.004  | <0.001 |
|                  | Smoking coefficient for SBP intercept                     | -0.0243 | 0.006  | <0.001 |
|                  | Ethnicity coefficient for SBP intercept                   | 0.0078  | 0.007  | 0.300  |
|                  | Family history of CVD coefficient for SBP intercept       | 0.0061  | 0.004  | 0.160  |
| $\tau_{31}$      | Association between BMI intercept and SBP intercept       | 0.1080  | 0.006  | <0.001 |
| $v_{30}$         | Random error term for SBP intercept                       | 0.0085  | 0.00   | <0.001 |
| SBP linear slope |                                                           |         |        |        |
| $\alpha_{31}$    | Population mean SBP linear slope                          | -0.0227 | 0.021  | 0.278  |
| $\gamma_{31}$    | Age at baseline coefficient for SBP linear slope          | 0.0024  | <0.001 | <0.001 |
|                  | Sex coefficient for SBP linear slope                      | -0.0004 | 0.004  | 0.927  |
|                  | Smoking coefficient for SBP linear slope                  | 0.0205  | 0.005  | <0.001 |
|                  | Ethnicity coefficient for SBP linear slope                | 0.0224  | 0.007  | 0.001  |
|                  | Family history of CVD coefficient for SBP linear slope    | -0.0013 | 0.004  | 0.748  |
| $\tau_{31}$      | Association between BMI intercept and SBP linear slope    | -0.0396 | 0.006  | <0.001 |
|                  | Association between BMI linear slope and SBP linear slope | 0.2325  | 0.019  | <0.001 |
| $v_{31}$         | Random error term for SBP linear slope                    | 0.0024  | <0.001 | <0.001 |
| $\epsilon_3$     | SBP measurement error variance                            | 0.0093  | <0.001 | <0.001 |
| TC Intercept     |                                                           |         |        |        |
| $\alpha_{40}$    | Population mean TC intercept                              | 2.9956  | 0.176  | <0.001 |
| $\gamma_{40}$    | Age at baseline coefficient for TC intercept              | 0.0456  | 0.003  | <0.001 |
|                  | Sex coefficient for TC intercept                          | 0.0660  | 0.036  | 0.070  |
| $\tau_{40}$      | Association between BMI intercept and TC intercept        | 0.4459  | 0.049  | <0.001 |
| $v_{40}$         | Random error term for TC intercept                        | 0.8960  | 0.025  | <0.001 |
| TC linear slope  |                                                           |         |        |        |
| $\alpha_{41}$    | Population mean TC linear slope                           | 2.1216  | 0.128  | <0.001 |
| $\gamma_{41}$    | Age at baseline coefficient for TC linear slope           | -0.0316 | 0.002  | <0.001 |
|                  | Sex coefficient for TC linear slope                       | -0.2677 | 0.026  | <0.001 |
| $\tau_{41}$      | Association between BMI intercept and TC linear slope     | -0.4808 | 0.035  | <0.001 |
| $\tau_{42}$      | Association between BMI linear slope and TC linear slope  | 0.9802  | 0.108  | <0.001 |
| $v_{41}$         | Random error term for TC linear slope                     | 0.1583  | 0.011  | <0.001 |
| $\epsilon_4$     | TC measurement error variance                             | 0.3426  | 0.006  | <0.001 |
| HDL Intercept    |                                                           |         |        |        |
| $\alpha_{50}$    | Population mean HDL intercept                             | 2.4124  | 0.054  | <0.001 |
| $\gamma_{50}$    | Age at baseline coefficient for HDL intercept             | 0.0032  | 0.011  | <0.001 |
|                  | Sex coefficient for HDL intercept                         | -0.3710 | 0.001  | <0.001 |
| $\tau_{51}$      | Association between BMI intercept and HDL intercept       | -0.3514 | 0.015  | <0.001 |
| $v_{50}$         | Random error term for HDL intercept                       | 0.0827  | -0.040 | <0.001 |
| HDL linear slope |                                                           |         |        |        |
| $\alpha_{51}$    | Population mean HDL linear slope                          | 0.1241  | 0.034  | <0.001 |
| $\gamma_{51}$    | Age at baseline coefficient for HDL linear slope          | 0.0020  | 0.001  | <0.001 |
|                  | Sex coefficient for HDL linear slope                      | 0.0041  | 0.007  | 0.558  |
| $\tau_{51}$      | Association between BMI intercept and HDL linear slope    | -0.0400 | 0.010  | <0.001 |
| $v_{51}$         | Random error term for HDL linear slope                    | 0.0090  | 0.001  | <0.001 |
| $\epsilon_5$     | HDL measurement error variance                            | 0.0333  | 0.001  | <0.001 |

**Table 44: Coefficient estimates for latent glycaemic measurement model**

|               | Parameter Description             | Estimated Mean | Standard error | p-value |
|---------------|-----------------------------------|----------------|----------------|---------|
| $\mu_0$       | FPG intercept                     | 4.2903         | 0.089          | <0.001  |
| $\theta_{01}$ | Glycaemic factor to FPG           | 1              | NA             | NA      |
| $\theta_{02}$ | Age to FPG                        | 0.0031         | 0.001          | 0.022   |
| $\theta_{03}$ | Sex to FPG                        | 0.2129         | 0.021          | <0.001  |
| $\theta_{04}$ | Ethnicity to FPG                  | 0.0100         | 0.037          | 0.786   |
| $\theta_{05}$ | Family history of diabetes to FPG | 0.1168         | 0.025          | <0.001  |
| $\epsilon_0$  | FPG measurement error variance    | 0.1649         | 0.007          | <0.001  |
| $\mu_1$       | 2-hr Glucose intercept            | 0.5707         | 0.223          | 0.011   |
| $\theta_{11}$ | Glycaemic factor to 2-hr glucose  | 2.4384         | 0.078          | <0.001  |
| $\theta_{12}$ | Age to 2-hr glucose               | 0.0716         | 0.003          | <0.001  |

|                 |                                            |         |       |        |
|-----------------|--------------------------------------------|---------|-------|--------|
| $\theta_{13}$   | Sex to 2-hr glucose                        | -0.1411 | 0.058 | 0.014  |
| $\theta_{14}$   | Ethnicity to 2-hr glucose                  | 0.3047  | 0.100 | 0.002  |
| $\theta_{15}$   | Family history of diabetes to 2-hr glucose | 0.3496  | 0.068 | <0.001 |
| $\varepsilon_1$ | 2-hr measurement error variance            | 2.3679  | 0.054 | <0.001 |
| $\mu_2$         | HbA1c intercept                            | 4.4769  | 0.073 | <0.001 |
| $\theta_{21}$   | Glycaemic factor to HBA1c                  | 0.5074  | 0.016 | <0.001 |
| $\theta_{22}$   | Age to HBA1c                               | 0.0101  | 0.001 | <0.001 |
| $\theta_{23}$   | Sex to HBA1c                               | -0.0457 | 0.001 | <0.001 |
| $\theta_{24}$   | Ethnicity to HBA1c                         | 0.1854  | 0.030 | <0.001 |
| $\theta_{25}$   | Family history of diabetes to HBA1c        | 0.0563  | 0.020 | 0.004  |
| $\varepsilon_2$ | HbA1c measurement error variance           | 0.1166  | 0.003 | <0.001 |

**Table 45: Covariance matrix  $\Omega$  for individual random error**

|          |          |          |          |          |          |          |          |          |          |          |          |
|----------|----------|----------|----------|----------|----------|----------|----------|----------|----------|----------|----------|
|          | $u_{10}$ | $u_{11}$ | $u_{20}$ | $u_{21}$ | $u_{22}$ | $u_{30}$ | $u_{31}$ | $u_{40}$ | $u_{41}$ | $u_{50}$ | $u_{51}$ |
| $u_{10}$ | 0.1165   |          |          |          |          |          |          |          |          |          |          |
| $u_{11}$ | 0.0095   | 0.0131   |          |          |          |          |          |          |          |          |          |
| $u_{20}$ | <0.0010  | <0.0010  | 0.0851   |          |          |          |          |          |          |          |          |
| $u_{21}$ | <0.0010  | <0.0010  | 0.0222   | 0.0209   |          |          |          |          |          |          |          |
| $u_{22}$ | <0.0010  | <0.0010  | <0.0010  | <0.0010  | 0.0107   |          |          |          |          |          |          |
| $u_{30}$ | <0.0010  | <0.0010  | 0.0080   | <0.0010  | <0.0010  | 0.0085   |          |          |          |          |          |
| $u_{31}$ | <0.0010  | <0.0010  | <0.0010  | 0.0018   | <0.0010  | <0.0017  | 0.0024   |          |          |          |          |
| $u_{40}$ | <0.0010  | <0.0010  | 0.0324   | <0.0010  | <0.0010  | 0.0031   | <0.0010  | 0.8960   |          |          |          |
| $u_{41}$ | <0.0010  | <0.0010  | <0.0010  | <0.0012  | <0.0010  | <0.0010  | 0.0066   | -0.2229  | 0.1583   |          |          |
| $u_{50}$ | <0.0010  | <0.0010  | -0.0118  | <0.0010  | <0.0010  | 0.0010   | <0.0010  | 0.0273   | <0.0010  | 0.0827   |          |
| $u_{51}$ | <0.0010  | <0.0010  | <0.0010  | -0.0059  | <0.0010  | <0.0010  | 0.0020   | <0.0010  | 0.0159   | 0.0061   | 0.0090   |

### HbA1c trajectory in individuals diagnosed with type 2 diabetes

The input parameters for the initial reduction in HbA1c and long term trend in HbA1c following diagnosis, derived from analysis of the UKPDS outcomes model (15), are reported in Table 46 and Table 47 respectively.

**Table 46: Estimated change in HbA1c in first year following diabetes diagnosis**

|                           | Distribution | Parameter 1 | Parameter 2 | Central estimate |
|---------------------------|--------------|-------------|-------------|------------------|
| Change in HbA1c Intercept | NORMAL       | -2.9465     | 0.0444513   | -2.9465          |
| HbA1c at baseline         | NORMAL       | 0.5184      | 0.4521958   | 0.5184           |

**Table 47: Estimated change in HbA1c following diabetes diagnosis over long term**

| Parameter Description                                     | Distribution | Parameter 1 | Parameter 2 | Central estimate |
|-----------------------------------------------------------|--------------|-------------|-------------|------------------|
| Longitudinal HbA1c for diabetes intercept                 | NORMAL       | -0.024      | 0.017       | -0.024           |
| Longitudinal HbA1c for diabetes log(time since diagnosis) | NORMAL       | 0.144       | 0.009       | 0.144            |
| Longitudinal HbA1c for diabetes Second year               | NORMAL       | -0.333      | 0.05        | -0.333           |
| Longitudinal HbA1c for diabetes lag HbA1c                 | NORMAL       | 0.759       | 0.004       | 0.759            |
| Longitudinal HbA1c for diabetes HbA1c at diagnosis        | NORMAL       | 0.085       | 0.004       | 0.0896           |

## Systolic blood pressure and cholesterol trajectory following treatment

The changes in systolic blood pressure and total cholesterol following treatment with anti-hypertensives or statins, and statin uptake are reported in Table 48.

**Table 48: Treatment effects following treatment**

| Parameter Description              | Distribution | Parameter 1 | Parameter 2 | Central estimate | Source |
|------------------------------------|--------------|-------------|-------------|------------------|--------|
| Simvastatin treatment effects      | NORMAL       | -1.45       | 0.11        | -1.45            | (20)   |
| Anti-hypertensive treatment effect | NORMAL       | -8.4        | 0.638       | -8.4             | (22)   |
| Statin Uptake                      | UNIFORM      | 0.65        | (0.4-0.9)   | 0.65             | (21)   |

## Metabolic Risk Factor screening

The distribution for the HbA1c threshold at which opportunistic screening for type 2 Diabetes is initiated even if the individual does not have a history of cardiovascular disease, microvascular disease or identified impaired glucose regulation is reported in Table 49.

**Table 49: Threshold for HbA1c opportunistic diagnosis**

| Parameter Description | Distribution | Parameter 1 | Parameter 2 | Central estimate | Source |
|-----------------------|--------------|-------------|-------------|------------------|--------|
| HbA1c at diagnosis    | NORMAL       | 8.1         | 0.073       | 8.1              | (16)   |

## COMORBID OUTCOMES AND MORTALITY

### Cardiovascular Disease

Cardiovascular risk is estimated using the QRISK2 model (25). Parameter distributions for men and women are reported in Table 50.

**Table 50: Input parameters of the QRISK2 risk model**

| Parameter Description    | Distribution | Parameter 1 | Parameter 2 | Central estimate |
|--------------------------|--------------|-------------|-------------|------------------|
| QRISK female ethnicity 2 | NORMAL       | 0.2163      | 0.0537      | 0.2163           |
| QRISK female ethnicity 3 | NORMAL       | 0.6905      | 0.069       | 0.6905           |
| QRISK female ethnicity 4 | NORMAL       | 0.3423      | 0.1073      | 0.3423           |
| QRISK female ethnicity 5 | NORMAL       | 0.0731      | 0.1071      | 0.0731           |
| QRISK female ethnicity 6 | NORMAL       | -0.0989     | 0.0619      | -0.0989          |
| QRISK female ethnicity 7 | NORMAL       | -0.2352     | 0.1275      | -0.2352          |
| QRISK female ethnicity 8 | NORMAL       | -0.2956     | 0.1721      | -0.2956          |
| QRISK female ethnicity 9 | NORMAL       | -0.1010     | 0.0793      | -0.1010          |
| QRISK female smoke 2     | NORMAL       | 0.2033      | 0.0152      | 0.2033           |
| QRISK female smoke 3     | NORMAL       | 0.48200     | 0.0220      | 0.4820           |
| QRISK female smoke 4     | NORMAL       | 0.6126      | 0.0178      | 0.6126           |
| QRISK female smoke 5     | NORMAL       | 0.7481      | 0.0194      | 0.7481           |
| QRISK female age 1       | NORMAL       | 5.0373      | 1.0065      | 5.0327           |
| QRISK female age 2       | NORMAL       | -0.0108     | 0.0022      | -0.0108          |
| QRISK female bmi         | NORMAL       | 0.4724      | 0.0423      | 0.4724           |
| QRISK female cholesterol | NORMAL       | 0.6375      | 0.0143      | 0.6375           |



|                                                    |          |           |          |           |
|----------------------------------------------------|----------|-----------|----------|-----------|
| QRISK female sbp                                   | NORMAL   | 0.0106    | 0.0045   | 0.0106    |
| QRISK female townsend                              | NORMAL   | 0.060     | 0.0068   | 0.060     |
| QRISK female fibrillation                          | NORMAL   | 1.3261    | 0.0310   | 1.3261    |
| QRISK female RA                                    | NORMAL   | 0.3626    | 0.0319   | 0.3626    |
| QRISK female Renal                                 | NORMAL   | 0.7636    | 0.0639   | 0.7636    |
| QRISK female Hypertension                          | NORMAL   | 0.5421    | 0.0115   | 0.5421    |
| QRISK female diabetes                              | NORMAL   | 0.8940    | 0.0199   | 0.8940    |
| QRISK female family history cvd                    | NORMAL   | 0.5997    | 0.0122   | 0.5997    |
| QRISK female age1 * smoke 1                        | NORMAL   | 0.1774    | 0.0355   | 0.1774    |
| QRISK female age 1 * smoke 2                       | NORMAL   | -0.3277   | 0.0655   | -0.3277   |
| QRISK age1 * smoke 3                               | NORMAL   | -1.1533   | 0.2307   | -1.1533   |
| QRISK female age 1 * smoke 4                       | NORMAL   | -1.5397   | 0.3079   | -1.5397   |
| QRISK female age 1 * atrial fibrillation           | NORMAL   | -4.6084   | 0.922    | -4.6084   |
| QRISK female age 1 * renal                         | NORMAL   | -2.6401   | 0.5280   | -2.6401   |
| QRISK female age 1 * hypertension                  | NORMAL   | -2.2480   | 0.4496   | -2.2480   |
| QRISK female age 1 * diabetes                      | NORMAL   | -1.8452   | 0.3690   | -1.8452   |
| QRISK female age 1 * bmi                           | NORMAL   | -3.0851   | 0.6170   | -3.0851   |
| QRISK female age 1 * family history cvd            | NORMAL   | -0.2481   | 0.0496   | -0.2481   |
| QRISK female age 1 * sbp                           | NORMAL   | -0.0132   | 0.0026   | -0.0132   |
| QRISK female age 1 * town                          | NORMAL   | -0.0369   | 0.0074   | -0.0369   |
| QRISK female age 2 * smoke 1                       | NORMAL   | -0.0053   | 0.0001   | -0.0053   |
| QRISK female age 2 * smoke 2                       | NORMAL   | -0.0005   | 0.0001   | -0.0005   |
| QRISK female age 2 * smoke 3                       | NORMAL   | -0.0105   | 0.0021   | -0.0105   |
| QRISK female age 2 * smoke 4                       | NORMAL   | -0.0155   | 0.0031   | -0.0155   |
| QRISK female age 2 * fibrillation                  | NORMAL   | -0.0507   | 0.0101   | -0.0507   |
| QRISK female age 2 * renal                         | NORMAL   | 0.0343    | 0.0069   | 0.0343    |
| QRISK female age 2 * hypertension                  | NORMAL   | 0.0258    | 0.0051   | 0.0258    |
| QRISK female age 2 * diabetes                      | NORMAL   | 0.0180    | 0.0036   | 0.0180    |
| QRISK female age 2 * bmi                           | NORMAL   | 0.0345    | 0.0069   | 0.0345    |
| QRISK female age 2 * family history cardiovascular | NORMAL   | -0.0062   | 0.0012   | -0.0062   |
| QRISK female age 2 * sbp                           | NORMAL   | -0.000029 | 0.000006 | -0.000029 |
| QRISK female age 2 * townsend                      | NORMAL   | -0.0011   | 0.0002   | -0.0011   |
| QRISK female 1 year survival                       | CONSTANT | 0.9983    | NA       | NA        |
| QRISK male ethnicity 2                             | NORMAL   | 0.3163    | 0.0425   | 0.3163    |
| QRISK male ethnicity 3                             | NORMAL   | 0.6092    | 0.0547   | 0.6092    |
| QRISK male ethnicity 4                             | NORMAL   | 0.5958    | 0.0727   | 0.5958    |
| QRISK male ethnicity 5                             | NORMAL   | 0.1142    | 0.0845   | 0.1142    |
| QRISK male ethnicity 6                             | NORMAL   | -0.3489   | 0.0641   | -0.3489   |
| QRISK male ethnicity 7                             | NORMAL   | -0.3604   | 0.1094   | -0.3604   |
| QRISK male ethnicity 8                             | NORMAL   | -0.2666   | 0.1538   | -0.2666   |
| QRISK male ethnicity 9                             | NORMAL   | -0.1208   | 0.0734   | -0.1208   |
| QRISK male SMOKE 2                                 | NORMAL   | 0.2033    | 0.0152   | 0.2033    |
| QRISK male SMOKE 3                                 | NORMAL   | 0.4820    | 0.0220   | 0.4820    |
| QRISK male SMOKE 4                                 | NORMAL   | 0.6126    | 0.0178   | 0.6126    |
| QRISK male SMOKE 5                                 | NORMAL   | 0.7481    | 0.0194   | 0.7481    |
| QRISK male age 1                                   | NORMAL   | 47.316    | 9.4630   | 47.316    |
| QRISK male age 2                                   | NORMAL   | -101.236  | 20.247   | -101.236  |
| QRISK male bmi                                     | NORMAL   | 0.5425    | 0.0299   | 0.5425    |
| QRISK male cholesterol                             | NORMAL   | 0.14425   | 0.0022   | 0.14425   |
| QRISK male sbp                                     | NORMAL   | 0.0081    | 0.0046   | 0.0081    |
| QRISK male townsend                                | NORMAL   | 0.0365    | 0.0048   | 0.0365    |
| QRISK male fibrillation                            | NORMAL   | 0.7547    | 0.1018   | 0.7547    |
| QRISK male RA                                      | NORMAL   | 0.3089    | 0.0445   | 0.3089    |
| QRISK male renal                                   | NORMAL   | 0.7441    | 0.0702   | 0.7441    |
| QRISK male hypertension                            | NORMAL   | 0.6965    | 0.011    | 0.6965    |
| QRISK male age 1 smoke 1                           | NORMAL   | -3.8805   | 0.7761   | -3.8805   |
| QRISK male age 1 smoke 2                           | NORMAL   | -16.703   | 3.3406   | -16.703   |
| QRISK male age 1 smoke 3                           | NORMAL   | -15.3738  | 3.5291   | -15.3738  |
| QRISK male age 1 smoke 4                           | NORMAL   | -17.6453  | 3.5291   | -17.6453  |

|                               |          |          |        |          |
|-------------------------------|----------|----------|--------|----------|
| QRISK male age 1 fibrillation | NORMAL   | -7.0146  | 1.4056 | -7.0282  |
| QRISK male age 1 renal        | NORMAL   | -17.015  | 3.4029 | -17.015  |
| QRISK male age 1 hypertension | NORMAL   | 33.9625  | 6.7925 | 33.9625  |
| QRISK male age 1 diabetes     | NORMAL   | 12.7886  | 2.5577 | 12.7886  |
| QRISK male age 1 bmi          | NORMAL   | 3.2680   | 0.6536 | 3.2680   |
| QRISK male age 1 fxcd         | NORMAL   | -17.9219 | 3.5844 | -17.9219 |
| QRISK male age 1 sbp          | NORMAL   | -0.1511  | 0.030  | -0.1511  |
| QRISK male age 1 town         | NORMAL   | -2.5502  | 0.5100 | -2.5502  |
| QRISK male age 2 SMOKE 1      | NORMAL   | 7.9709   | 1.5942 | 7.9709   |
| QRISK male age 2 SMOKE 2      | NORMAL   | 23.6859  | 4.7372 | 23.6859  |
| QRISK male age 2 SMOKE 3      | NORMAL   | 23.1371  | 4.6274 | 23.1371  |
| QRISK male age 2 SMOKE 4      | NORMAL   | 26.8674  | 5.3735 | 26.8674  |
| QRISK male age 2 Fibrillation | NORMAL   | 14.4518  | 2.8904 | 14.4518  |
| QRISK male age 2 renal        | NORMAL   | 28.2702  | 5.654  | 28.2702  |
| QRISK male age 2 hypertension | NORMAL   | -18.8167 | 3.7633 | -18.8167 |
| QRISK male age 2 diabetes     | NORMAL   | 0.9630   | 0.1926 | 0.963    |
| QRISK male age 2 bmi          | NORMAL   | 10.5517  | 2.1103 | 10.5517  |
| QRISK male age 2 FXCD         | NORMAL   | 26.6047  | 5.3209 | 26.6047  |
| QRISK male age 2 sbp          | NORMAL   | 0.2911   | 0.0582 | 0.2911   |
| QRISK male age 2 town         | NORMAL   | 3.007    | 0.6014 | 3.007    |
| QRISK2 male 1 year survival   | CONSTANT | 0.997    | NA     | NA       |

The QRISK2 model was modified to allow a linear relationship between HbA1c and the risk of cardiovascular disease for individuals with IGR and type 2 Diabetes (HbA1c>42 mmol/mol). The parameter distributions for these additional inputs are reported in Table 51.

**Table 51: Additional parameters for linear relationship between HbA1c and cardiovascular disease**

| Parameter Description                     | Distribution | Parameter 1 | Parameter 2 | Central estimate | Source |
|-------------------------------------------|--------------|-------------|-------------|------------------|--------|
| Female RR of MI due to HbA1c in diabetics | LOGNORMAL    | 0.078       | 0.030       | 1.08             | (25)   |
| Male RR of MI due to HbA1c in diabetics   | LOGNORMAL    | 0.108       | 0.023       | 1.11             | (25)   |
| RR of stroke due to HbA1c in diabetics    | LOGNORMAL    | 0.092       | 0.026       | 1.096            | (25)   |
| Log(RR) of cvd due to IGR                 | NORMAL       | 0.223       | 0.043       | 1.25             | (28)   |

### Congestive Heart Failure

The parameter distributions for congestive heart failure based on the Framingham Heart Study (29) are reported in Table 52.

**Table 52: Input parameters for Congestive Heart Failure Risk model for men and women**

| Parameter Description                      | Distribution | Parameter 1 | Parameter 2 | Central estimate |
|--------------------------------------------|--------------|-------------|-------------|------------------|
| Male Heart failure baseline hazard         | NORMAL       | -9.2087     | 0.9209      | -9.2087          |
| Male Heart failure Age                     | NORMAL       | 0.0412      | 0.0278      | 0.0412           |
| Male Heart failure LVH                     | NORMAL       | 0.9026      | 1.0359      | 0.9026           |
| Male Heart failure Heart rate              | NORMAL       | 0.0166      | 0.0174      | 0.0166           |
| Male Heart failure Systolic blood pressure | NORMAL       | 0.00804     | 0.0117      | 0.00804          |
| Male Heart failure CHD                     | NORMAL       | 1.6079      | 0.5336      | 1.6079           |
| Male Heart failure Valve disease           | NORMAL       | 0.9714      | 0.6557      | 0.9714           |
| Male Heart failure Diabetes                | NORMAL       | 0.2244      | 0.6682      | 0.2244           |
| Female Heart failure baseline hazard       | NORMAL       | -10.7988    | 1.0799      | -10.7988         |

|                                               |        |         |        |         |
|-----------------------------------------------|--------|---------|--------|---------|
| Female Heart failure Age                      | NORMAL | 0.0503  | 0.0301 | 0.0503  |
| Female Heart failure LVH                      | NORMAL | 1.3402  | 0.8298 | 1.3402  |
| Female Heart failure Heart rate               | NORMAL | 0.0105  | 0.0193 | 0.0105  |
| Female Heart failure Systolic blood pressure  | NORMAL | 0.00337 | 0.0109 | 0.00337 |
| Female Heart failure CHD                      | NORMAL | 1.5549  | 0.5973 | 1.5549  |
| Female Heart failure Valve disease            | NORMAL | 1.3929  | 0.6707 | 1.3929  |
| Female Heart failure Diabetes                 | NORMAL | 1.3857  | 0.7105 | 1.3857  |
| Female Heart failure BMI                      | NORMAL | 0.0578  | 0.0555 | 0.0578  |
| Female Heart failure Valve disease & Diabetes | NORMAL | -0.986  | 1.4370 | -0.986  |

## Microvascular Complications

The parameter distributions for the risk models for foot ulcer, blindness, renal failure, first amputation and second amputation are reported in Table 53. Parameters for renal failure were based on the UKPDS Outcomes Model 1 (15), whereas parameters for other microvascular complications were based on the UKPDS Outcomes Model 2 (23).

**Table 53: Input parameters for microvascular complications**

| Parameter Description                  | Distribution | Parameter 1 | Parameter 2 | Central estimate |
|----------------------------------------|--------------|-------------|-------------|------------------|
| Renal failure baseline hazard          | NORMAL       | -10.016     | 0.939       | -10.016          |
| Renal failure Weibull shape            | NORMAL       | 1.865       | 1.4352      | 1.865            |
| Renal failure systolic blood pressure  | NORMAL       | 0.404       | 0.106       | 0.404            |
| Renal failure blindness                | NORMAL       | 2.082       | 0.551       | 2.082            |
| Foot ulcer baseline hazard             | NORMAL       | -11.295     | 1.13        | -11.295          |
| Foot ulcer age at diagnosis            | NORMAL       | 0.043       | 0.014       | 0.043            |
| Foot ulcer female                      | NORMAL       | -0.962      | 0.255       | -0.962           |
| Foot ulcer BMI                         | NORMAL       | 0.053       | 0.019       | 0.053            |
| Foot ulcer HbA1c                       | NORMAL       | 0.16        | 0.056       | 0.16             |
| Foot ulcer PVD                         | NORMAL       | 0.968       | 0.258       | 0.968            |
| Amputation baseline hazard             | NORMAL       | -14.844     | 1.205       | -14.844          |
| Amputation age at diagnosis            | NORMAL       | 0.023       | 0.011       | 0.023            |
| Amputation female                      | NORMAL       | -0.445      | 0.189       | -0.445           |
| Amputation atrial fibrillation         | NORMAL       | 1.088       | 0.398       | 1.088            |
| Amputation HbA1c                       | NORMAL       | 0.248       | 0.042       | 0.248            |
| Amputation HDL                         | NORMAL       | -0.059      | 0.032       | -0.059           |
| Amputation heart rate                  | NORMAL       | 0.098       | 0.05        | 0.098            |
| Amputation MMALB                       | NORMAL       | 0.602       | 0.18        | 0.602            |
| Amputation peripheral vascular disease | NORMAL       | 1.01        | 0.189       | 1.01             |
| Amputation white blood count           | NORMAL       | 0.04        | 0.017       | 0.04             |
| Amputation Stroke                      | NORMAL       | 1.299       | 0.245       | 1.299            |
| Amputation shape                       | NORMAL       | 2.067       | 0.193       | 2.067            |
| Amputation with Ulcer lambda           | NORMAL       | -0.881      | 0.139       | -0.881           |
| Amputation with Ulcer age at diagnosis | NORMAL       | -0.065      | 0.027       | -0.065           |
| Amputation with Ulcer PVD              | NORMAL       | 1.769       | 0.449       | 1.769            |
| Second Amputation baseline hazard      | NORMAL       | -3.455      | 0.565       | -3.455           |
| Second Amputation HbA1c                | NORMAL       | 0.127       | 0.06        | 0.127            |
| Blindness baseline hazard              | NORMAL       | -10.6774    | 0.759       | -10.6774         |
| Blindness age at diagnosis             | NORMAL       | 0.047       | 0.009       | 0.047            |
| Blindness HbA1c                        | NORMAL       | 0.171       | 0.032       | 0.171            |
| Blindness heart rate                   | NORMAL       | 0.08        | 0.039       | 0.08             |
| Blindness systolic blood pressure      | NORMAL       | 0.068       | 0.032       | 0.068            |
| Blindness white blood cells            | NORMAL       | 0.052       | 0.019       | 0.052            |

|               |        |       |       |       |
|---------------|--------|-------|-------|-------|
| Blindness CHF | NORMAL | 0.841 | 0.287 | 0.841 |
| Blindness IHD | NORMAL | 0.61  | 0.208 | 0.61  |

## Cancer

The parameter distributions for the incidence and hazard ratios for breast cancer and colorectal cancer are reported in Table 54.

**Table 54: Input parameters for breast cancer and colorectal cancer risk models**

| Parameter Description                              | Distribution | Parameter 1 | Parameter 2 | Central estimate | Source          |
|----------------------------------------------------|--------------|-------------|-------------|------------------|-----------------|
| Colorectal cancer men                              | NORMAL       | 0.0011      | 0.0001      | 0.0011           | <sup>(36)</sup> |
| Colorectal cancer women                            | NORMAL       | 0.0005      | 0.0000      | 0.0005           | <sup>(36)</sup> |
| Breast cancer pre-menopause                        | NORMAL       | 0.0010      | 0.0001      | 0.0010           | <sup>(34)</sup> |
| Breast cancer post-menopause                       | NORMAL       | 0.0028      | 0.0002      | 0.0028           | <sup>(34)</sup> |
| Colorectal cancer BMI relative risk for men        | LOGNORMAL    | 0.1906      | 0.0111      | 1.21             | <sup>(35)</sup> |
| Colorectal cancer BMI relative risk for women      | LOGNORMAL    | 0.0392      | 0.0151      | 1.04             | <sup>(35)</sup> |
| Breast cancer BMI relative risk for pre-menopause  | LOGNORMAL    | -0.1165     | 0.0251      | 0.89             | <sup>(35)</sup> |
| Breast cancer BMI relative risk for post-menopause | LOGNORMAL    | 0.0862      | 0.0205      | 1.09             | <sup>(35)</sup> |

The parameter distributions for breast and colorectal cancer mortality are reported in Table 55.

**Table 55: Input parameters for breast cancer and colorectal cancer mortality (41)**

| Parameter Description             | Distribution | Parameter 1 | Parameter 2 | Central estimate |
|-----------------------------------|--------------|-------------|-------------|------------------|
| Breast cancer 5 year survival     | BETA         | 439.69      | 2354.44     | 0.157            |
| Colorectal cancer 5 year survival | BETA         | 1457.56     | 1806.35     | 0.447            |

## Osteoarthritis

The parameter distributions for the incidence and hazard ratios for osteoarthritis are reported below.

**Table 56: Input parameters for the osteoarthritis risk model (37)**

| Parameter Description         | Distribution | Parameter 1 | Parameter 2 | Central estimate |
|-------------------------------|--------------|-------------|-------------|------------------|
| Osteoarthritis incidence      | NORMAL       | 0.0053      | 0.0000004   | 0.0053           |
| Osteoarthritis RR of diabetes | LOGNORMAL    | 0.723       | 0.317       | 2.06             |
| Osteoarthritis RR of BMI      | LOGNORMAL    | 0.073       | 0.026       | 1.076            |

## Depression

The parameter distributions for the incidence and hazard ratios for depression are reported below.

**Table 57: Input parameters for the depression risk model**

| Parameter Description   | Distribution | Parameter 1 | Parameter 2 | Central estimate | Source |
|-------------------------|--------------|-------------|-------------|------------------|--------|
| Odds of depression      | BETA         | 336         | 8803        | 0.0397           | (39)   |
| Odds ratio for diabetes | LOGNORMAL    | 0.4187      | 0.1483      | 1.52             | (39)   |
| Odds ratio for stroke   | LOGNORMAL    | 1.8406      | 0.5826      | 6.3              | (40)   |

## UTILITIES

The parameter distributions used to estimate health state utilities in the model are reported below.

**Table 58: Utility input parameters**

| Parameter Description                           | Distribution | Parameter 1 | Parameter 2 | Central estimate | Source |
|-------------------------------------------------|--------------|-------------|-------------|------------------|--------|
| Renal/ulcer baseline utility                    | NORMAL       | 0.689       | 0.014       | 0.689            | (47)   |
| Renal dialysis                                  | NORMAL       | -0.078      | 0.026       | -0.078           | (47)   |
| Foot ulcer                                      | NORMAL       | -0.099      | 0.013       | -0.099           | (47)   |
| Amputation/heart failure baseline utility       | NORMAL       | 0.807       | 0.005       | 0.807            | (23)   |
| Heart failure                                   | NORMAL       | -0.101      | 0.032       | -0.101           | (23)   |
| Amputation                                      | NORMAL       | -0.172      | 0.045       | -0.172           | (23)   |
| Stable angina multiplicative factor decrement   | NORMAL       | 0.801       | 0.038       | 0.801            | (21)   |
| Unstable angina multiplicative factor decrement | NORMAL       | 0.77        | 0.038       | 0.77             | (21)   |
| MI multiplicative factor decrement              | NORMAL       | 0.76        | 0.018       | 0.76             | (21)   |
| Stroke multiplicative factor decrement          | NORMAL       | 0.629       | 0.04        | 0.629            | (21)   |
| Cancer baseline utility                         | NORMAL       | 0.8         | 0.0026      | 0.8              | (48)   |
| Cancer decrement                                | NORMAL       | -0.06       | 0.008       | -0.06            | (48)   |
| Osteoarthritis utility                          | NORMAL       | 0.69        | 0.069       | 0.69             | (49)   |
| Depression baseline utility                     | NORMAL       | 0.48        | 0.048       | 0.48             | (51)   |
| Depression remitters                            | NORMAL       | 0.31        | 0.031       | 0.31             | (51)   |
| Depression responders                           | NORMAL       | 0.20        | 0.020       | 0.20             | (51)   |
| Depression non-responders                       | NORMAL       | 0.070       | 0.007       | 0.070            | (51)   |
| Depression drop-outs                            | NORMAL       | 0.050       | 0.005       | 0.050            | (51)   |
| Age utility decrement                           | NORMAL       | -0.004      | 0.0001      | -0.004           | (21)   |

## UNIT HEALTH CARE COSTS

The parameter distributions used to estimate health state utilities in the model are reported below.

**Table 59: Cost input parameters**

| Parameter Description     | Distribution | Parameter 1 | Parameter 2 | Central estimate | Source |
|---------------------------|--------------|-------------|-------------|------------------|--------|
| DPP Intervention          | GAMMA        |             |             | £270             | PHE    |
| <b>DIABETES COSTS</b>     |              |             |             |                  |        |
| Insulin (annual cost)     | GAMMA        | 3.367       | 408.6       | £1375.72         | (58)   |
| Metformin (annual cost)   | CONSTANT     | NA          | NA          | £18.83           | (54)   |
| Sitagliptin (annual cost) | CONSTANT     | NA          | NA          | £433.77          | (54)   |

|                                       |          |          |          |           |      |
|---------------------------------------|----------|----------|----------|-----------|------|
| Nurse appointment (Advanced)          | GAMMA    | 100      | 0.26     | £25.52    | (53) |
| Health care assistant appointment     | GAMMA    | 100      | 0.03     | £3.40     | (53) |
| Eye screening                         | GAMMA    | 15.3664  | 1.58219  | £24.31    | (56) |
| HbA1c test                            | GAMMA    | 100      | 0.03     | £3.00     | (55) |
| Lipids test                           | GAMMA    | 100      | 0.01     | £1.00     | (55) |
| LfT test                              | GAMMA    | 100      | 0.01     | £1.00     | (55) |
| B12 test                              | GAMMA    | 100      | 0.01     | £1.00     | (55) |
| Urine test                            | GAMMA    | 100      | 0.01     | £1.00     | (55) |
| Nicotine replacement therapy          | GAMMA    | 100      | 1.03     | £103.00   | (53) |
| <b>CVD COSTS</b>                      |          |          |          |           |      |
| Unstable Angina hospital admission    | GAMMA    | 100      | 12.75591 | £1275.59  | (20) |
| Revascularisation in hospital         | GAMMA    | 100      | 60.36846 | £6036.85  | (20) |
| MI Hospital admission                 | GAMMA    | 100      | 15.54896 | £1554.90  | (20) |
| First Outpatient appointment          | GAMMA    | 100      | 1.653571 | £165.36   | (20) |
| Subsequent outpatient appointments    | GAMMA    | 100      | 1.100574 | £110.06   | (20) |
| Fatal CHD                             | GAMMA    | 100      | 7.125001 | £712.50   | (38) |
| Fatal Stroke                          | GAMMA    | 100      | 44.42562 | £4442.56  | (60) |
| First year stroke                     | GAMMA    | 100      | 97.15908 | £9715.91  | (60) |
| Subsequent year stroke                | GAMMA    | 100      | 27.29644 | £2729.64  | (20) |
| Glytrin Spray                         | CONSTANT | NA       | NA       | £12.61    | (20) |
| Isosorbide mononitrate                | CONSTANT | NA       | NA       | £13.54    | (20) |
| Verapamil                             | CONSTANT | NA       | NA       | £50.57    | (20) |
| Atenolol                              | CONSTANT | NA       | NA       | £36.42    | (20) |
| Aspirin                               | CONSTANT | NA       | NA       | £8.01     | (20) |
| Ramipril                              | CONSTANT | NA       | NA       | £90.45    | (20) |
| ARB                                   | CONSTANT | NA       | NA       | £253.28   | (20) |
| Clopidogrel                           | CONSTANT | NA       | NA       | £554.41   | (20) |
| Congestive Heart Failure              | GAMMA    | 67.20788 | 45.99274 | £3091.07  | (62) |
| <b>MICROVASCULAR COSTS</b>            |          |          |          |           |      |
| Blindness year 1                      | GAMMA    | 10.26317 | 139.7079 | £1433.85  | (66) |
| Blindness subsequent years            | GAMMA    | 11.31099 | 42.37999 | £479.36   | (66) |
| Amputation year 1                     | GAMMA    | 19.37193 | 521.4492 | £10101.48 | (66) |
| Amputation subsequent years           | GAMMA    | 4.597909 | 412.4212 | £1896.28  | (66) |
| Renal Haemodialysis                   | GAMMA    | 100      | 420.49   | £42049.00 | (63) |
| Renal Automated Peritoneal dialysis   | GAMMA    | 100      | 272.1714 | £27217.14 | (63) |
| Renal Ambulatory peritoneal dialysis  | GAMMA    | 100      | 197.4225 | £19742.25 | (63) |
| Renal transplant                      | GAMMA    | 100      | 236.5973 | £23659.73 | (64) |
| Immunosuppressants                    | GAMMA    | 100      | 69.58745 | £6958.75  | (64) |
| Foot ulcer not infected               | GAMMA    | 100      | 1.677526 | £167.75   | (65) |
| Foot ulcer with cellulitis            | GAMMA    | 100      | 4.431003 | £443.10   | (65) |
| Foot ulcer with osteomyelitis         | GAMMA    | 100      | 8.215817 | £821.58   | (65) |
| <b>OTHER DISEASE COSTS</b>            |          |          |          |           |      |
| Breast Cancer                         | GAMMA    | 100      | 138.1811 | £13818.11 | (67) |
| Colorectal cancer Dukes A             | GAMMA    | 100      | 100.9135 | £10091.35 | (68) |
| Colorectal cancer Dukes B             | GAMMA    | 100      | 173.1532 | £17315.32 | (68) |
| Colorectal cancer Dukes C             | GAMMA    | 100      | 265.5026 | £26550.26 | (68) |
| Colorectal cancer Dukes D             | GAMMA    | 100      | 166.2553 | £16625.53 | (68) |
| Osteoarthritis                        | GAMMA    | 100      | 9.616886 | £961.69   | (69) |
| Depression – Practice nurse surgery   | GAMMA    | 100      | 0.090154 | £9.02     | (70) |
| Depression – Practice nurse home      | GAMMA    | 100      | 0.270463 | 27.05     | (70) |
| Depression – Practice nurse telephone | GAMMA    | 100      | 0.090154 | 9.02      | (70) |
| Depression – Health visitor           | GAMMA    | 100      | 0.387834 | 38.78     | (70) |
| Depression – District nurse           | GAMMA    | 100      | 0.377628 | 37.76     | (70) |
| Depression – Other nurse              | GAMMA    | 100      | 0.090154 | 9.02      | (70) |
| Depression – HCA phlebotomist         | GAMMA    | 100      | 0.034021 | 3.40      | (70) |
| Depression – Other primary care       | GAMMA    | 100      | 0.255154 | 25.52     | (70) |
| Depression – Out of Hours             | GAMMA    | 100      | 0.268661 | 26.87     | (70) |
| Depression – NHS Direct               | GAMMA    | 100      | 0.25295  | 25.30     | (70) |
| Depression – Walk-in Centre           | GAMMA    | 100      | 0.388316 | 38.83     | (70) |
| Depression – Prescribed medicines     | GAMMA    | 100      | 0.096144 | 9.61      | (70) |

|                             |          |     |      |         |      |
|-----------------------------|----------|-----|------|---------|------|
| Depression – Secondary Care | GAMMA    | 100 | 0.81 | 81.00   | (70) |
| DIAGNOSIS AND OTHER COSTS   |          |     |      |         |      |
| GP appointment              | GAMMA    | 100 | 0.47 | £46.95  | (53) |
| Diabetes diagnosis          | GAMMA    | 100 | 0.12 | £14.81  | (55) |
| Hypertension diagnosis      | GAMMA    | 100 | 0.57 | £56.51  | (19) |
| Anti-hypertensives          | GAMMA    | 100 | 1.96 | £195.94 | (59) |
| Simvastatin                 | CONSTANT | NA  | NA   | £26.59  | (54) |

## QUALITY ASSURANCE

Within ScHARR, research is conducted within a framework of standards and systems that ensure high quality science and governance. This includes ensuring staff receive appropriate training and operate within a culture of high quality research, building sufficient time into each project for quality assurance (including error checking and validation), internal and external review of models and ideally external peer review through publication in academic journals.

The SPHR Diabetes Prevention Model has undergone an extensive process of quality assurance and error checking, both during its development and during the adaptations required for this analysis. Face validity around the model structure and assumptions was provided during model development by means of regular input from a group of stakeholders, including clinicians, diabetes researchers, patients and public health commissioners, and during model adaptation by a group of stakeholders representing the seven DPP demonstrator sites.

A guide to checking, avoiding and identifying errors in health economic models has recently been developed within ScHARR (81). Where possible, the suggested black box verification tests were carried out as part of model development. A more complex set of internal validations were also carried out to ensure that the model was behaving as planned (e.g. that metabolic trajectories and risk equations work in the intended way). The model has also undergone a series of validations against external data (82), and the structure and model assumptions have undergone formal peer review for a publications associated with the model (12). Finally, in addition to ScHARR's own process of model quality assurance and error checking, the model code was externally reviewed and refactored as part of the PHE project adaptation by Dr Mat Hall, a software engineer from the Department of Computer Science at the University of Sheffield.

## REFERENCE LIST

- (1) Squires H. A methodological framework for developing the structure of Public Health economic models. White Rose thesis online 2014. Available from: URL: <http://etheses.whiterose.ac.uk/5316/>
- (2) National Institute for Health and Care Excellence. PH35: Preventing type 2 diabetes: population and community-level interventions. National Institute for Health and Care Excellence 2011NICE public health guidance 35. Available from: URL: <http://www.nice.org.uk/nicemedia/live/13472/54345/54345.pdf>
- (3) National Institute for Health and Care Excellence. PH38 Preventing type 2 diabetes - risk identification and interventions for individuals at high risk: guidance. National Institute for Health and Care Excellence 2012NICE public health guidance 38. Available from: URL: <http://guidance.nice.org.uk/PH38/Guidance/pdf/English>
- (4) Watson P, Preston L, Squires H, Chilcott J, Brennan A. Modelling the Economics of Type 2 Diabetes Mellitus Prevention: A Literature Review of Methods. *Appl Health Econ Health Policy* 2014;12(3):239-53.
- (5) NatCen Social Research. Health Survey for England. University College London Department of Epidemiology and Public Health 2011. Available from: URL: <http://www.esds.ac.uk/findingData/hseTitles.asp>
- (6) 2011 Census. Office for National Statistics 2011. Available from: URL: <https://www.ons.gov.uk/census/2011census>
- (7) Official Statistics: English indices of deprivation 2015. Department for communities and local government 2015. Available from: URL: <https://www.gov.uk/government/statistics/english-indices-of-deprivation-2015>
- (8) Diabetes prevalence model for local authorities and CCGs. National cardiovascular intelligence network 2015.
- (9) Lomax N, Norman G. Estimating population attribute values in a table: "Get me started in" iterative proportional fitting. *The Professional Geographer* 2015.
- (10) Public Health England. NHS Health Check: Best practice guidance. 2015.
- (11) Green MA, Li J, Relton C, Strong M, Kearns B, Wu M, et al. Cohort profile: The Yorkshire Health Study. *Int J Epidemiol* 2014;1-6.
- (12) Breeze P, Squires H, Chilcott J, Stride C, Diggle PJ, Brunner E, et al. A statistical model to describe longitudinal and correlated metabolic risk factors: the Whitehall II prospective study. *Journal of Public Health* 2015.
- (13) Marmot M, Brunner E. Cohort Profile: the Whitehall II study. *Int J Epidemiol* 2005 Apr;34(2):251-6.
- (14) Colagiuri S, Cull CA, Holman RR. Are lower fasting plasma glucose levels at diagnosis of type 2 diabetes associated with improved outcomes?: U.K. prospective diabetes study 61. *Diabetes Care* 2002 Aug;25(8):1410-7.
- (15) Clarke PM, Gray AM, Briggs A, Farmer AJ, Fenn P, Stevens RJ, et al. A model to estimate the lifetime health outcomes of patients with type 2 diabetes: the United Kingdom



Prospective Diabetes Study (UKPDS) Outcomes Model (UKPDS no. 68). *Diabetologia* 2004 Oct;47(10):1747-59.

- (16) Davies MJ, Heller S, Skinner TC, Campbell MJ, Carey ME, Cradock S, et al. Effectiveness of the diabetes education and self management for ongoing and newly diagnosed (DESMOND) programme for people with newly diagnosed type 2 diabetes: cluster randomised controlled trial. *BMJ* 2008 Mar 1;336(7642):491-5.
- (17) Statins for the prevention of cardiovascular events in patients at increased risk of developing cardiovascular disease or those with established cardiovascular disease. National Institute of Health and Care Excellence 2006 Technology appraisals, TA94. Available from: URL: <http://www.nice.org.uk/TA094>
- (18) National Institute for Health and Care Excellence. Hypertension: Clinical management of primary hypertension in adults. 2011. Report No.: CG 127.
- (19) CG127 Hypertension: costing template. National Institute for Care and Clinical Excellence 2011. Available from: URL: <http://guidance.nice.org.uk/CG127/CostingTemplate/xls/English>
- (20) Ara R, Pandor A, Stevens J, Rees A, Rafia R. Early high-dose lipid-lowering therapy to avoid cardiac events: a systematic review and economic evaluation. *Health Technol Assess* 2009 Jul;13(34):1-118.
- (21) Ward S, Lloyd JM, Pandor A, Holmes M, Ara R, Ryan A, et al. A systematic review and economic evaluation of statins for the prevention of coronary events. *Health Technol Assess* 2007 Apr;11(14):1-iv.
- (22) Wald DS, Law M, Morris JK, Bestwick JP, Wald NJ. Combination therapy versus monotherapy in reducing blood pressure: meta-analysis on 11,000 participants from 42 trials. *Am J Med* 2009 Mar;122(3):290-300.
- (23) Hayes AJ, Leal J, Gray AM, Holman RR, Clarke PM. UKPDS outcomes model 2: a new version of a model to simulate lifetime health outcomes of patients with type 2 diabetes mellitus using data from the 30 year United Kingdom Prospective Diabetes Study: UKPDS 82. *Diabetologia* 2013 Sep;56(9):1925-33.
- (24) D'Agostino RB, Sr., Vasan RS, Pencina MJ, Wolf PA, Cobain M, Massaro JM, et al. General cardiovascular risk profile for use in primary care: the Framingham Heart Study. *Circulation* 2008 Feb 12;117(6):743-53.
- (25) Hippisley-Cox J, Coupland C, Vinogradova Y, Robson J, Minhas R, Sheikh A, et al. Predicting cardiovascular risk in England and Wales: prospective derivation and validation of QRISK2. *BMJ* 2008 Jun 28;336(7659):1475-82.
- (26) ClinRisk. QResearch 2013. Available from: URL: <http://www.qrisk.org/>
- (27) Hippisley-Cox J, Coupland C, Robson J, Brindle P. Derivation, validation, and evaluation of a new QRISK model to estimate lifetime risk of cardiovascular disease: cohort study using QResearch database. *BMJ* 2010 Dec 9;341:c6624. doi: 10.1136/bmj.c6624.:c6624.
- (28) Khaw KT, Wareham N, Luben R, Bingham S, Oakes S, Welch A, et al. Glycated haemoglobin, diabetes, and mortality in men in Norfolk cohort of european prospective investigation of cancer and nutrition (EPIC-Norfolk). *BMJ* 2001 Jan 6;322(7277):15-8.

- (29) Kannel WB, D'Agostino RB, Silbershatz H, Belanger AJ, Wilson PW, Levy D. Profile for estimating risk of heart failure. *Arch Intern Med* 1999 Jun 14;159(11):1197-204.
- (30) Kaffashian S, Dugravot A, Brunner EJ, Sabia S, Ankri J, Kivimaki M, et al. Midlife stroke risk and cognitive decline: a 10-year follow-up of the Whitehall II cohort study. *Alzheimers Dement* 2013 Sep;9(5):572-9.
- (31) Johansen NB, Vistisen D, Brunner EJ, Tabak AG, Shipley MJ, Wilkinson IB, et al. Determinants of aortic stiffness: 16-year follow-up of the Whitehall II study. *PLoS One* 2012;7(5):e37165.
- (32) Dadvand P, Rankin J, Shirley MD, Rushton S, Pless-Mulloli T. Descriptive epidemiology of congenital heart disease in Northern England. *Paediatr Perinat Epidemiol* 2009 Jan;23(1):58-65.
- (33) Davies M, Hobbs F, Davis R, Kenkre J, Roalfe AK, Hare R, et al. Prevalence of left-ventricular systolic dysfunction and heart failure in the Echocardiographic Heart of England Screening study: a population based study. *Lancet* 2001 Aug 11;358(9280):439-44.
- (34) Lahmann PH, Hoffmann K, Allen N, van Gils CH, Khaw KT, Tehard B, et al. Body size and breast cancer risk: findings from the European Prospective Investigation into Cancer And Nutrition (EPIC). *Int J Cancer* 2004 Sep;111(5):762-71.
- (35) Renehan AG, Tyson M, Egger M, Heller RF, Zwahlen M. Body-mass index and incidence of cancer: a systematic review and meta-analysis of prospective observational studies. *Lancet* 2008 Feb 16;371(9612):569-78.
- (36) Pischon T, Lahmann PH, Boeing H, Friedenreich C, Norat T, Tjonneland A, et al. Body size and risk of colon and rectal cancer in the European Prospective Investigation Into Cancer and Nutrition (EPIC). *J Natl Cancer Inst* 2006 Jul 5;98(13):920-31.
- (37) Schett G, Kleyer A, Perricone C, Sahinbegovic E, Iagnocco A, Zwerina J, et al. Diabetes is an independent predictor for severe osteoarthritis: results from a longitudinal cohort study. *Diabetes Care* 2013 Feb;36(2):403-9.
- (38) Palmer AJ, Roze S, Valentine WJ, Minshall ME, Foos V, Lurati FM, et al. The CORE Diabetes Model: Projecting long-term clinical outcomes, costs and cost-effectiveness of interventions in diabetes mellitus (types 1 and 2) to support clinical and reimbursement decision-making. *Curr Med Res Opin* 2004;20(Suppl. 1):S5-S26.
- (39) Golden SH, Lazo M, Carnethon M, Bertoni AG, Schreiner PJ, Diez Roux AV, et al. Examining a bidirectional association between depressive symptoms and diabetes. *JAMA* 2008 Jun 18;299(23):2751-9.
- (40) Whyte EM, Mulsant BH, Vanderbilt J, Dodge HH, Ganguli M. Depression after stroke: a prospective epidemiological study. *J Am Geriatr Soc* 2004 May;52(5):774-8.
- (41) Cancer Survival in England: Patients Diagnosed, 2006–2010 and Followed up to 2011. Office of National Statistics 2012. Available from: URL: <http://www.ons.gov.uk/ons/publications/re-reference-tables.html?edition=tcM%3A77-277733>
- (42) Mortality Statistics: Deaths registered in England and Wales (Series DR), 2011. Office of National Statistics 2013. Available from: URL: <http://www.ons.gov.uk/ons/publications/re-reference-tables.html?edition=tcM%3A77-277727>

- (43) Seshasai SR, Kaptoge S, Thompson A, Di AE, Gao P, Sarwar N, et al. Diabetes mellitus, fasting glucose, and risk of cause-specific death. *N Engl J Med* 2011 Mar 3;364(9):829-41.
- (44) Dolan P, Gudex C, Kind P, Williams A. A social tariff for EuroQoL: Results from a UK general population survey. Discussion Paper No. 138. Centre for Health Economics 1995;University of York(York).
- (45) Ara R, Wailoo A. NICE DSU Technical Support Document 12: The use of health state utility values in decision models. 2011.
- (46) Alva M, Gray A, Mihaylova B, Clarke P. The Effect of Diabetes Complications on Health-Related Quality of Life: The importance of longitudinal data to address patient heterogeneity. *Health Econ* 2013 Jul 11;10.
- (47) Coffey JT, Brandle M, Zhou H, Marriott D, Burke R, Tabaei BP, et al. Valuing health-related quality of life in diabetes. *Diabetes Care* 2002 Dec;25(12):2238-43.
- (48) Yabroff KR, Lawrence WF, Clauser S, Davis WW, Brown ML. Burden of illness in cancer survivors: findings from a population-based national sample. *J Natl Cancer Inst* 2004 Sep 1;96(17):1322-30.
- (49) Black C, Clar C, Henderson R, MacEachern C, McNamee P, Quayyum Z, et al. The clinical effectiveness of glucosamine and chondroitin supplements in slowing or arresting progression of osteoarthritis of the knee: a systematic review and economic evaluation. *Health Technol Assess* 2009 Nov;13(52):1-148.
- (50) Zimovetz EA, Wolowacz SE, Classi PM, Birt J. Methodologies used in cost-effectiveness models for evaluating treatments in major depressive disorder: a systematic review. *Cost Eff Resour Alloc* 2012 Feb 1;10(1):1-10.
- (51) Benedict A, Arellano J, De CE, Baird J. Economic evaluation of duloxetine versus serotonin selective reuptake inhibitors and venlafaxine XR in treating major depressive disorder in Scotland. *J Affect Disord* 2010 Jan;120(1-3):94-104.
- (52) Alva M, Gray A, Mihaylova B, Clarke P. The effect of diabetes complications on health-related quality of life: the importance of longitudinal data to address patient heterogeneity. *Health Econ* 2013 Jul 11;10.
- (53) Curtis L. Unit costs of health and social care. 2014.
- (54) British National Formulary. <http://www.bnf.org/> 2015
- (55) NHS reference costs 2012-13. Department of Health 2015. Available from: URL: <https://www.gov.uk/government/publications/nhs-reference-costs-2012-to-2013>
- (56) Burr JM, Mowatt G, Hernandez R, Siddiqui MA, Cook J, Lourenco T, et al. The clinical effectiveness and cost-effectiveness of screening for open angle glaucoma: a systematic review and economic evaluation. *Health Technol Assess* 2007 Oct;11(41):iii-x, 1.
- (57) Belsey JD, Pittard JB, Rao S, Urdahl H, Jameson K, Dixon T. Self blood glucose monitoring in type 2 diabetes. A financial impact analysis based on UK primary care. *Int J Clin Pract* 2009 Mar;63(3):439-48.
- (58) Poole C, Tetlow T, McEwan P, Holmes P, Currie C. The prescription cost of managing people with type 1 and type 2 diabetes following initiation of treatment with either insulin

glargine or insulin detemir in routine general practice in the UK: a retrospective database analysis. *Current Medical Research and Opinion* 2007;23(1):S41-S48.

- (59) Blak BT, Mullins CD, Shaya FT, Simoni-Wastila L, Cooke CE, Weir MR. Prescribing trends and drug budget impact of the ARBs in the UK. *Value Health* 2009 Mar;12(2):302-8.
- (60) Youman P, Wilson K, Harraf F, Kalra L. The economic burden of stroke in the United Kingdom. *Pharmacoeconomics* 2003;21 Suppl 1:43-50.:43-50.
- (61) Palmer S, Sculpher M, Philips Z, Robinson M., Ginnelly L, Bakhai A eal. A cost-effectiveness model comparing alternative management strategies for the use of glycoprotein IIb/IIIa antagonists in non-ST-elevation acute coronary syndrome. Report to the National Institute for Clinical Excellence.; 2008.
- (62) Clarke P, Gray A, Legood R, Briggs A, Holman R. The impact of diabetes-related complications on healthcare costs: results from the United Kingdom Prospective Diabetes Study (UKPDS Study No. 65). *Diabet Med* 2003 Jun;20(6):442-50.
- (63) Baboolal K, McEwan P, Sondhi S, Spiewanowski P, Wechowski J, Wilson K. The cost of renal dialysis in a UK setting--a multicentre study. *Nephrol Dial Transplant* 2008 Jun;23(6):1982-9.
- (64) Cost-effectiveness of transplantation. NHS Blood and Transplant . 2013.
- (65) Gordois A, Scuffham P, Shearer A, Oglesby A, Tobian JA. The health care costs of diabetic peripheral neuropathy in the US. *Diabetes Care* 2003 Jun;26(6):1790-5.
- (66) Alva M, Gray A, Mihaylova B, Leal J, Holman R. The impact of diabetes-related complications on healthcare costs: new results from the UKPDS (UKPDS 84). *Diabetic Medicine* 2014;459-66.
- (67) Madan J, Rawdin A, Stevenson M, Tappenden P. A rapid-response economic evaluation of the UK NHS Cancer Reform Strategy breast cancer screening program extension via a plausible bounds approach. *Value Health* 2010 Mar;13(2):215-21.
- (68) Tappenden P, Eggington S, Nixon R, Chilcott J, Sakai H, Karnon J. Colorectal cancer screening options appraisal Report to the English Bowel Cancer Screening Working Group. National Health Service 2004. Available from: URL: <http://www.cancerscreening.nhs.uk/bowel/scharr.pdf>
- (69) Osteoarthritis Costing Report: Implementing NICE guidance. National Institute for Clinical Excellence 2008. Available from: URL: <http://www.nice.org.uk/nicemedia/live/11926/39712/39712.pdf>
- (70) Chalder M, Wiles NJ, Campbell J, Hollinghurst SP, Searle A, Haase AM, et al. A pragmatic randomised controlled trial to evaluate the cost-effectiveness of a physical activity intervention as a treatment for depression: the treating depression with physical activity (TREAD) trial. *Health Technol Assess* 2012;16(10):1-iv.
- (71) Gillett M, Royle P, Snaith A, Scotland G, Poobalan A, Imamura M, et al. Non-pharmacological interventions to reduce the risk of diabetes in people with impaired glucose regulation: a systematic review and economic evaluation. *Health Technol Assess* 2012 Aug;16(33):1-iv.

- (72) Byrne C, Steenkamp R, Castledine C, Ansell D, Feehally J. UK Renal Registry 12th Annual Report (December 2009): chapter 4: UK ESRD prevalent rates in 2008: national and centre-specific analyses. *Nephron Clin Pract* 2010;115 Suppl 1:c41-67. doi: 10.1159/000301159. Epub@2010 Mar 31.:c41-c67.
- (73) OECD. Purchasing Power Parities (PPPs) for OECD Countries. [http://stats.oecd.org/Index.aspx?datasetcode=SNA\\_TABLE4](http://stats.oecd.org/Index.aspx?datasetcode=SNA_TABLE4) 2013. Available from: URL: <http://www.oecd.org/>
- (74) Rudisill C, Charlton J, Booth HP, Gulliford MC. Are healthcare costs from obesity associated with body mass index, comorbidity or depression? Cohort study using electronic health records. *Clin Obes* 2016 Jun;6(3):225-31
- (75) Ashra NB, Spong R, Carter P, Davies MJ, Dunkley A, Gillies C, et al. A systematic review and meta-analysis assessing the effectiveness of pragmatic lifestyle interventions for the prevention of type 2 diabetes mellitus in routine practice. *Public Health England*; 2015. PHE publications gateway number: 2015280.
- (76) Dunkley AJ, Bodicoat DH, Greaves CJ, Russell C, Yates T, Davies MJ, et al. Diabetes Prevention in the Real World: Effectiveness of Pragmatic Lifestyle Interventions for the Prevention of Type 2 Diabetes and of the Impact of Adherence to Guideline Recommendations: A Systematic Review and Meta-analysis. *Diabetes Care* 2014 Apr;37(4):922-33.
- (77) Crandall J, Schade D, Ma Y, Fujimoto WY, Barrett-Connor E, Fowler S, et al. The influence of age on the effects of lifestyle modification and metformin in the prevention of diabetes. *J Gerontol A Biol Sci Med Sci* 2006;61(10):1075-81.
- (78) Gillies CL, Abrams KR, Lambert PC, Cooper NJ, Sutton AJ, Hsu RT, et al. Pharmacological and lifestyle interventions to prevent or delay type 2 diabetes in people with impaired glucose tolerance: systematic review and meta-analysis. *BMJ* 2007;334:229.
- (79) Lindstrom J, Pertonen M, Eriksson J, Aunola S, Hamalainen H, Ilanne-Parikka P, et al. Determinants for the effectiveness of lifestyle intervention in the Finnish Diabetes Prevention Study. *Diabetes Care* 2008;31:857-62.
- (80) Glover G, Henderson J. Quantifying health impacts of government policies. Department of Health; 2010.
- (81) Tappenden P, Chilcott JB. Avoiding and identifying errors and other threats to the credibility of health economic models. *Pharmacoeconomics* 2014.
- (82) Thomas C, Watson P, Squires H, Chilcott J, Brennan A. A validation of the SPHR diabetes prevention model (Poster PRM 74. ID:39300). ISPOR 17th Annual European Congress, Amsterdam November 2014 Available from: URL: [http://www.ispor.org/RESEARCH\\_STUDY\\_DIGEST/research\\_index.asp](http://www.ispor.org/RESEARCH_STUDY_DIGEST/research_index.asp)
